# Supplementary material
Source: PubMed Central journal article supplement (PMC3983326)
Supplement: ol500506t_si_003.pdf [file ol500506t_si_003.pdf]

Asymmetric Synthesis of  $\alpha$ -Allyl- $\alpha$ -Aryl  $\alpha$ -Amino Acids by Tandem  
Alkylation/ $\pi$ -Allylation of  $\alpha$ -Iminoesters

*John M. Curto, Joshua S. Dickstein, Simon Berritt, Marisa C. Kozlowski\**

Supporting Information

**Table of Contents**

|                                                                     |         |
|---------------------------------------------------------------------|---------|
| General Considerations                                              | S2      |
| General Procedure for the Synthesis of $\alpha$ -Iminoesters        | S3-7    |
| Parallel Microscale Experimentation Data                            | S7-9    |
| General Procedure for Three Component Coupling                      | S9-20   |
| Studies on Allylation of <i>N</i> -Alkylated Intermediate           | S21     |
| Studies on Addition of Additives to Tandem Process                  | S22     |
| Reduction of Tandem Product to Primary Amine                        | S22-23  |
| Synthesis of Higher Ring Order Proline Analog                       | S23-24  |
| Synthesis of <i>N</i> -Alkyl $\alpha$ -Phenyl $\alpha$ -Amino acids | S24-25  |
| References                                                          | S25     |
| Spectral Data                                                       | S26-76  |
| HPLC Traces of Products                                             | S77-S94 |

## General Considerations.

Unless otherwise stated, all non-aqueous reactions were carried out under an atmosphere of dry argon in dry glassware. All glassware used in three component coupling reactions was base-washed (KOH/*i*-PrOH) prior to use. When necessary, solvents and reagents were dried prior to use. Tetrahydrofuran, diethyl ether, 2-methyltetrahydrofuran, cyclopentyl methyl ether and toluene were distilled from Na/benzophenone prior to use. Organometallic reagents (EtMgBr, *n*PentylMgBr) were purchased from Aldrich, or made from magnesium turnings/ribbon. Analytical thin layer chromatography (TLC) was performed on Silicycle 250  $\mu\text{m}$  silica-gel F-254 plates.

$^1\text{H}$  NMR and  $^{13}\text{C}$  NMR spectra were recorded on a AM-500 Fourier transform NMR spectrometer at 500 MHz and 125 MHz, respectively. Chemical shifts are reported relative to the solvent resonance peak  $\delta$  7.27 ( $\text{CDCl}_3$ ) for  $^1\text{H}$  and  $\delta$  77.16 ( $\text{CDCl}_3$ ) for  $^{13}\text{C}$ . Data are reported as follows: chemical shift, multiplicity (s = singlet, d = doublet, t = triplet, q = quartet, b = broad singlet, m = multiplet), coupling constants, and number of protons. High resolution mass spectra were obtained using a VG autospec with an ionization mode of either ESI or CI. Infrared spectra are reported in  $\text{cm}^{-1}$ . Melting points were obtained and are uncorrected. Unless otherwise noted, yields refer to isolated material on the basis of product purity  $\geq 95\%$  by  $^1\text{H}$  NMR following silica gel chromatography with Silica-P flash silica gel (50-63  $\mu\text{m}$  mesh particle size). Enantiomeric excess was determined utilizing chiral stationary phase (CSP) HPLC or SFC on OD (cellulose tris(3,5-dimethylphenylcarbamate) coated on silica gel) or IA (amylose tris(3,5-dimethylphenylcarbamate) immobilized on silica gel) columns.

### General Procedure A for the Synthesis of $\alpha$ -Iminoesters **1a-1l**

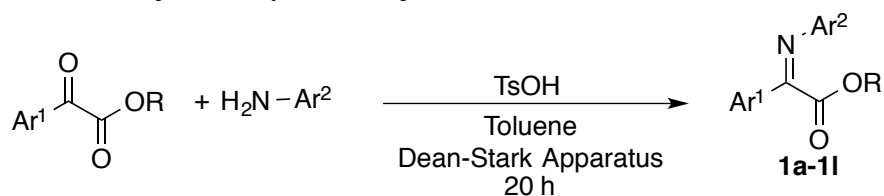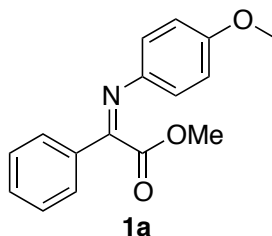

**(Z)-Methyl 2-(4-methoxyphenylimino)-2-phenylacetate (1a)** [Table 1, entry 1]. To a solution of para-anisidine (2.46 g, 20 mmol) in toluene (29 mL), tosic acid monohydrate (350 mg, 2.0 mmol) was added. To this solution was added methyl benzoylformate (3.28 g, 20 mmol). The solution was then heated at reflux with azeotropic removal of water under N<sub>2</sub> (Dean-Stark conditions) for 20 h. The mixture was then cooled, passed through SiO<sub>2</sub> with 30% EtOAc/Hexanes, and concentrated. The resulting solid was recrystallized from hexanes to afford **1a** (5.0 g) in 93% yield as a 12:1 mixture of Z:E isomers in the form of a bright yellow crystalline solid confirmed by x-ray crystallography. Spectral data agreed with those reported previously by Zhang et al.<sup>1</sup>

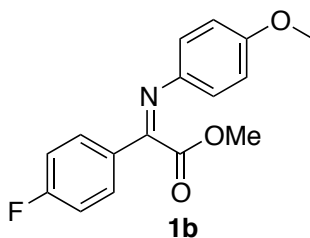

**(Z)-Methyl 2-(4-methoxyphenylimino)-2-(4-fluorophenyl)acetate (1b)** [Table 2, entry 3]. Following the general procedure A, *p*-anisidine (1.80 g, 14.6 mmol) was reacted with methyl (*p*-fluorobenzoyl)formate (2.66 g, 14.6 mmol) and TsOH (251 mg, 1.46 mmol) in toluene (21 mL) for 14.5 h under Dean-Stark conditions. After filtration, concentration and column chromatography (5% EtOAc/hexanes) product **1b** was frozen and placed *in vacuo* overnight to provide **1b** (2.64 g) in 63% yield as a 10:1 mixture of Z:E isomers in the form of a yellow solid. Spectral data agreed with those reported previously.<sup>1</sup>

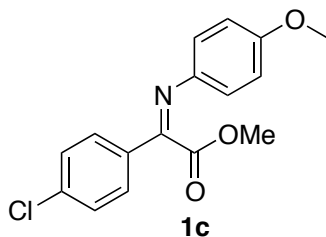

**(Z)-Methyl 2-(4-methoxyphenylimino)-2-(4-chlorophenylimino)acetate (1c)** [Table 2, entry 4]. Following the general procedure A, *p*-anisidine (305.5 mg, 2.48 mmol) was reacted with methyl (*p*-chlorobenzoyl)formate (411 mg, 2.07 mmol) and TsOH (36 mg, .207 mmol) in toluene (12.5 mL) for 20 h under Dean-Stark conditions. After filtration, concentration and column chromatography (10% EtOAc/hexanes) product **1c** (488 mg) was obtained in 79% yield as a 13:1 mixture of isomers in the form of a dark yellow oil. Spectral data agreed with those reported previously.<sup>1</sup>

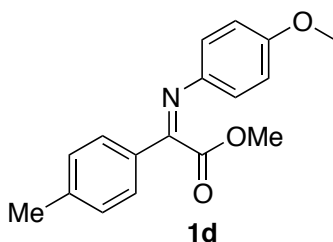

**(Z)-Methyl 2-(4-methoxyphenylimino)-2-(4-methylphenylimino)acetate (1d)** [Table 2, entry 5]. Following the general procedure A, *p*-anisidine (2.9 g, 23.5 mmol) was reacted with methyl (*p*-methylbenzoyl)formate (3.5 g, 19.6 mmol) and TsOH (337 mg, 1.96 mmol) in toluene (28 mL) for 14 h under Dean-Stark conditions. After filtration, concentration and recrystallization in hexanes product **1d** (2.4 g) was obtained in 43% yield as a 10:1 mixture of *Z*:*E* isomers in the form of dark yellow crystalline solid. Spectral data agreed with those reported previously.<sup>1</sup>

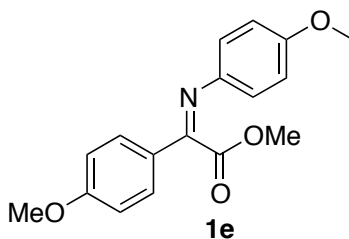

**(Z)-Methyl 2-(4-methoxyphenylimino)-2-(4-methoxyphenylimino)acetate (1e)** [Table 2, entry 6]. Following the general procedure A, *p*-anisidine (2.75 g, 22.3 mmol) was reacted with methyl (*p*-methoxybenzoyl)formate (3.6 g, 18.6 mmol) and TsOH (337 mg, 0.186 mmol) in toluene (26.5 mL) for 20 h under Dean-Stark conditions. After filtration, concentration, hot gravity filtration and recrystallization from hexanes product **1e** (2.6 g)



was obtained in 47% yield as a 19:1 mixture of Z:E isomers in the form of yellow crystalline solid. Spectral data agreed with those reported previously.<sup>1</sup>

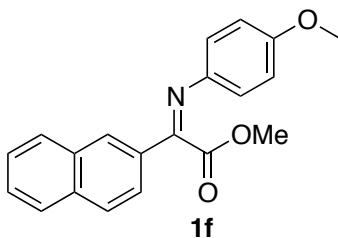

**(Z)-Methyl 2-(4-methoxyphenylimino)-2-(naphthalen-2-yl)acetate (1f)** [Table 2, entry 7]. Following the general procedure A, *p*-anisidine (788 mg, 6.44 mmol) was reacted with methyl (2-naphthalene)formate (1.36 g, 6.44 mmol) and TsOH (110 mg, .64 mmol) in toluene (9.1 mL) for 24 h under Dean-Stark conditions. After filtration, concentration, hot gravity filtration and recrystallization from 6% CH<sub>2</sub>Cl<sub>2</sub>/hexanes, product **1f** (1.1 g) was obtained in 55% yield as a 30:1 mixture of Z:E isomers in the form of yellow crystalline solid. Spectral data agreed with those reported previously.<sup>1</sup>

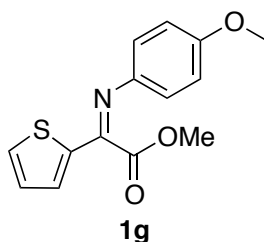

**(Z)-Methyl 2-(4-methoxyphenylimino)-2-(thiophen-2-yl)acetate (1g)** [Table 2, entry 8]. Following the general procedure A, *p*-anisidine (362 mg, 2.94 mmol) was reacted with methyl (2-thiophene)formate (417 mg, 2.45 mmol) and TsOH (42 mg, 0.245 mmol) in toluene (5 mL) for 20 h under Dean-Stark conditions. After filtration, concentration and column chromatography (10% EtOAc/hexanes) product **1g** (350 mg) was obtained in 52% yield as a 15:1 mixture of Z:E isomers in the form of a dark yellow solid: mp 92-94 °C; <sup>1</sup>H NMR (500 MHz, CDCl<sub>3</sub>) δ 7.52 (d, *J* = 5.0 Hz, 1H), 7.39 (d, *J* = 3.8 Hz, 1H), 7.10 (t, *J* = 4.2 Hz, 1H), 6.96 (d, *J* = 8.7 Hz, 2H), 6.87 (d, *J* = 8.7 Hz, 2H), 3.81 (s, 3H), 3.71 (s, 3H); <sup>13</sup>C NMR (125 MHz, CDCl<sub>3</sub>) δ 165.2, 157.7, 153.1, 142.7, 141.1, 131.2, 131.2, 128.0, 121.7, 114.3, 55.5, 52.4; IR (film) 2952, 1734, 1607, 1500, 1246 cm<sup>-1</sup>; HRMS (ESI) calcd for C<sub>14</sub>H<sub>13</sub>NO<sub>3</sub>S [M+H]<sup>+</sup> *m/z* = 276.0694; found 276.0692.

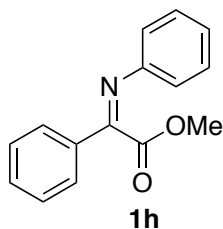

**(Z)-Methyl 2-phenyl-2-(phenylimino)acetate (1h)** [Table 2, entry 9]. Following the general procedure A, aniline (1.79 g, 19.2 mmol) was reacted with methyl benzoylformate (3 g, 18.3 mmol) and TsOH (174 mg, 0.9 mmol) in toluene (30 mL) for

7 h under Dean-Stark conditions. After filtration, concentration and recrystallization in hexanes, product **1h** (3.6 g) was obtained in 82% yield as a 10:1 mixture of Z:E isomers in the form of a pale yellow solid. Spectral data agreed with those reported previously by Hu et al.<sup>2</sup>

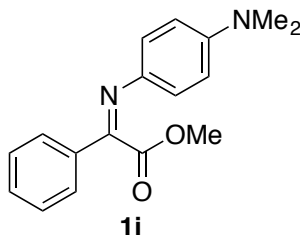

**(Z)-Methyl 2-(4-dimethylaminophenylimino)-2-phenylacetate (1i)** [Table 2, entry 10]. Following the general procedure A, *N,N*-Dimethyl-*p*-phenylenediamine (1.0 g, 7.3 mmol) was reacted with methyl benzoylformate (1.2 g, 7.3 mmol) and tosic acid monohydrate (260 mg, 1.5 mmol) in toluene (10.4 mL) for 20 h under Dean-Stark conditions. After filtration, concentration and column chromatography (7.5% EtOAc/hexanes) to afford **1i** (568 mg) in 28% yield as a 8:1 mixture of Z:E isomers in the form of a brown crystalline solid: mp 66-68 °C; <sup>1</sup>H NMR (500 MHz, CDCl<sub>3</sub>) δ 7.84 (dd, *J* = 7.8, 1.4 Hz, 2H), 7.49-7.43 (m, 3H), 7.00 (d, *J* = 8.9 Hz, 2H), 6.71 (d, *J* = 7.9 Hz, 2H), 3.74 (s, 3H), 2.97 (s, 6H); <sup>13</sup>C NMR (125 MHz, CDCl<sub>3</sub>) δ 170.0, 156.8, 148.9, 139.3, 134.8, 131.1, 128.7, 127.7, 121.9, 112.8, 52.0, 40.7 (minor rotamer peaks: 128.9, 128.5, 125.2, 111.8, 53.1, 40.4).

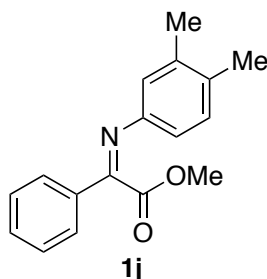

**(Z)-Methyl 2-(3,4-dimethylphenylimino)-2-phenylacetate (1j)** [Table 2, entry 11]. Following the general procedure A, 3,4-dimethyl aniline (1.0 g, 8.2 mmol) was reacted with methyl benzoylformate (1.35 g, 8.2 mmol) and tosic acid monohydrate (282 mg, 1.5 mmol) in toluene (12 mL) for 20 h under Dean-Stark conditions. After filtration, concentration and column chromatography (7% EtOAc/hexanes) to afford **1j** (1.56 g) in 71% yield as a 12:1 mixture of Z:E isomers in the form of a yellow amorphous solid; <sup>1</sup>H NMR (500 MHz, CDCl<sub>3</sub>) δ 7.86 (dd, *J* = 8.0, 1.7 Hz, 1H), 7.52-7.44 (m, 3H), 7.08 (d, *J* = 7.9 Hz, 1H), 6.81 (d, *J* = 1.8 Hz, 1H), 6.72 (dd, *J* = 7.9, 1.8 Hz, 1H), 3.69 (s, 3H), 2.25 (s, 3H), 2.24 (s, 3H); <sup>13</sup>C NMR (125 MHz, CDCl<sub>3</sub>) δ 166.0, 159.3, 147.9, 137.3, 134.3, 133.6, 131.7, 130.1, 128.8, 128.0, 121.3, 116.8, 52.0, 20.0, 19.4.

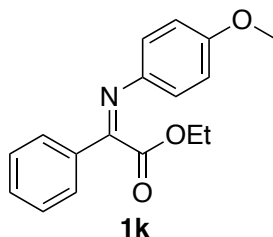

**(Z)-Ethyl 2-(4-methoxyphenylimino)-2-phenylacetate (1k)** Following the general procedure A, para-anisidine (3.9 g, 32 mmol) was reacted with ethyl benzoylformate (3.3 g, 31 mmol) and tosic acid monohydrate (300 mg, 1.5 mmol) in toluene (46 mL) for 20 h under Dean-Stark conditions. After filtration and concentration the resulting solid was recrystallized from hexanes to afford **1k** (7.3 g) in 91% yield as a 9:1 mixture of Z:E isomers in the form of a bright yellow crystalline solid. Spectral data agreed with those reported previously.<sup>1</sup>

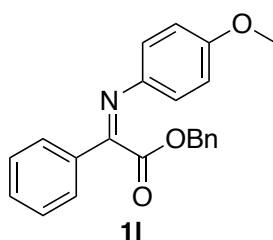

**(Z)-Benzyl 2-(4-methoxyphenylimino)-2-phenylacetate (1l)**. Following the general procedure A, para-anisidine (1.5 g, 12.5 mmol) was reacted with benzyl 2-oxo-2-phenylacetate (2.9 g, 12.1 mmol) and tosic acid monohydrate (117 mg, 0.6 mmol) in benzene (18 mL) for 20 h under Dean-Stark conditions. After filtration and concentration the resulting solid was recrystallized from hexanes to afford **1l** (3.6 g) in 86% yield in the form of a yellow solid. Spectral data agreed with those reported previously by You et al.<sup>3</sup>

### Parallel Microscale Experimentation (Table 1 and S1)

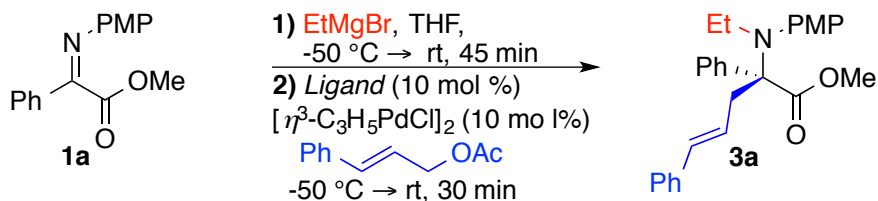

The following procedure is representative of the high-throughput experimentation reactions described in this publication. The ligands (0.86  $\mu\text{mol}$ ) were dosed into the 96-well reactor 1-mL vials as solutions (50  $\mu\text{L}$  of a 0.017 M solution in THF). Plates of these ligands may be plated in advance of the screen; the solvent is removed by evacuation on a Genevac, and the plates are stored in a glovebox. A solution of  $[\eta^3\text{-C}_3\text{H}_5\text{PdCl}]_2$  (0.86  $\mu\text{mol}$  Pd, 50  $\mu\text{L}$  of a 0.017 M solution in THF) was then added to the reaction vials and was evacuated to dryness on a Genevac. A parylene stir-bar was added to each vial. In a separate 20 dram vial,  $\alpha$ -iminoester **1a** (914  $\mu\text{mol}$ , 246 mg) was

dissolved in 4.9 mL THF. The vial was cooled to -50 °C on a Mecour Coolingbox combined with a Julabo temperature controller and 3.0 M EtMgBr in Et<sub>2</sub>O (1500 μmol, 0.50 ml) was added. The reaction mixture was warmed to ambient temperature and allowed to react for 45 min and subsequently cooled back to -50 °C. Cinnamyl acetate (8.5 μmol) was dosed into the 96 well reactor 1-mL vials with ligand/catalyst mixture at -50 °C as solutions (50 μL of a 0.17 M solution in THF). The substrate and Grignard mixture was then dosed to the reaction vials at -50 °C (50 μL of a 0.18M solution in THF). The vials were then sealed and allowed to warm to ambient temperature. After stirring for 45 min the residues were diluted with 500 μL of a 5% solution of glacial acetic acid in isopropyl alcohol and the contents were stirred for 30 min. Into a separate 96-well plate LC block was added 750 μL of MeCN per well followed by 20 μL of the diluted reaction mixtures. The 96-well plate LC block was then sealed with a polypropylene 1 mL cap mat. The reactions were analyzed using a CSP SFC (OD-H 250x4.6mm, 5 μm, MeOH/CO<sub>2</sub>, 3 mL/min, 35 C, 200 bar, 215nm, 4% MeOH for 4 min then to 40% at 6 min hold for 5 min, Peak 1 at 6.9 min and Peak 2 at 7.5 min).

**Table S1:** Selected Results from Parallel Microscale Experimentation (8.6 μmmol) and Comparison to Scale Up (0.372 mmol) when Applicable (eq S2).

| Ligand                         | Total Area | PME Screen <sup>a</sup> |        |                     | Bench top Scale Up <sup>b</sup> |                     |       |
|--------------------------------|------------|-------------------------|--------|---------------------|---------------------------------|---------------------|-------|
|                                |            | Peak 1                  | Peak 2 | er (%) <sup>c</sup> | conv. (%) <sup>d</sup>          | er (%) <sup>e</sup> |       |
| S-BINAP                        | <b>S1</b>  | 3252                    | 972    | 2280                | 30:70                           | >90                 | 90:10 |
| S-H8-BINAP                     | <b>S2</b>  | 5424                    | 3229   | 2195                | 60:40                           | >90                 | 74:26 |
| (R)-Tol-BINAP                  | <b>S3</b>  | 5127                    | 3264   | 1863                | 64:36                           | ~90                 | 56:44 |
| (R)-Segphos                    | <b>S4</b>  | 781                     | 550    | 231                 | 70:30                           | >90                 | 70:30 |
| (R)-P3-Segphos                 | <b>S5</b>  | 5358                    | 1681   | 3677                | 31:69                           | >90                 | 90:10 |
| (R)-Difluorophos               | <b>S6</b>  | 456                     | 317    | 139                 | 70:30                           | >90                 | 94:6  |
| (R)-Cl <sub>2</sub> MeO-Biphep | <b>S7</b>  | 5230                    | 3530   | 1700                | 68:32                           | ~90                 | 87:13 |
| SL-A102-1                      | <b>S8</b>  | 5126                    | 3194   | 1932                | 62:38                           | -                   | -     |
| SL-A121-1                      | <b>S9</b>  | 5311                    | 2119   | 3192                | 40:60                           | -                   | -     |
| (S)-C1-Tunephos                | <b>S10</b> | 2574                    | 742    | 1832                | 29:71                           | ~30                 | 64:36 |
| (S)-C2-Tunephos                | <b>S11</b> | 4041                    | 1228   | 2813                | 30:70                           | -                   | -     |
| (S)-C3-Tunephos                | <b>S12</b> | 5334                    | 1675   | 3659                | 31:69                           | >90                 | 89:11 |
| (S)-C4-Tunephos                | <b>S13</b> | 5248                    | 1711   | 3537                | 33:67                           | -                   | -     |
| (S)-C5-Tunephos                | <b>S14</b> | 5280                    | 1876   | 3404                | 36:64                           | -                   | -     |
| (S)-C6-Tunephos                | <b>S15</b> | 4380                    | 1475   | 2905                | 34:66                           | -                   | -     |
| (S)-Me-Soniphos                | <b>S16</b> | 2297                    | 578    | 1719                | 25:75                           | >90                 | 70:30 |
| (S)-Cyclohex-Soniphos          | <b>S17</b> | 5475                    | 1379   | 4096                | 25:75                           | >90                 | 86:14 |
| (-)-TMBTP                      | <b>S18</b> | 5512                    | 3747   | 1765                | 68:32                           | >90                 | 70:30 |
| (R)-P-Phos                     | <b>S19</b> | 520                     | 353    | 167                 | 68:32                           | >90                 | 90:10 |
| (S)-Xylyl-P-Phos               | <b>S20</b> | 964                     | 283    | 681                 | 29:71                           | -                   | -     |
| SL-W001-1                      | <b>S21</b> | 5252                    | 2043   | 3209                | 39:61                           | -                   | -     |
| SL-W009-1                      | <b>S22</b> | 5356                    | 1720   | 3636                | 32:68                           | >90                 | 74:26 |
| SL-M001-1                      | <b>S23</b> | 3623                    | 2421   | 1202                | 69:31                           | >90                 | 83:17 |
| SL-M003-1                      | <b>S24</b> | 940                     | 346    | 594                 | 37:63                           | -                   | -     |
| (R,R)-DACH-Phenyl Trost        | <b>S25</b> | 0                       | 0      | 0                   | 50:50                           | <10                 | ND    |
| (R,R)-DACH-Naphthyl            | <b>S26</b> | 499                     | 164    | 335                 | 33:67                           | -                   | -     |
| (R)-Pfaltz(Ph)                 | <b>S27</b> | 0                       | 0      | 0                   | 50:50                           | ~15                 | 57:43 |
| (S)-Xyl-SDP                    | <b>S28</b> | 5299                    | 2023   | 3276                | 38:62                           | -                   | -     |

<sup>a</sup> 8.6 μmol of **1a**, run at a starting temperature of -50 °C. <sup>b</sup> 0.372 mmol of **1a**, run at a starting temperature of -78 °C.

<sup>c</sup>Determined by chiral SFC <sup>d</sup>Conv. is determined by amount of **3a** to N-alkylated intermediate **4**. <sup>e</sup>Determined by chiral HPLC and when major enantiomer was opposite from PME screen, the opposite enantiomer of ligand was used.

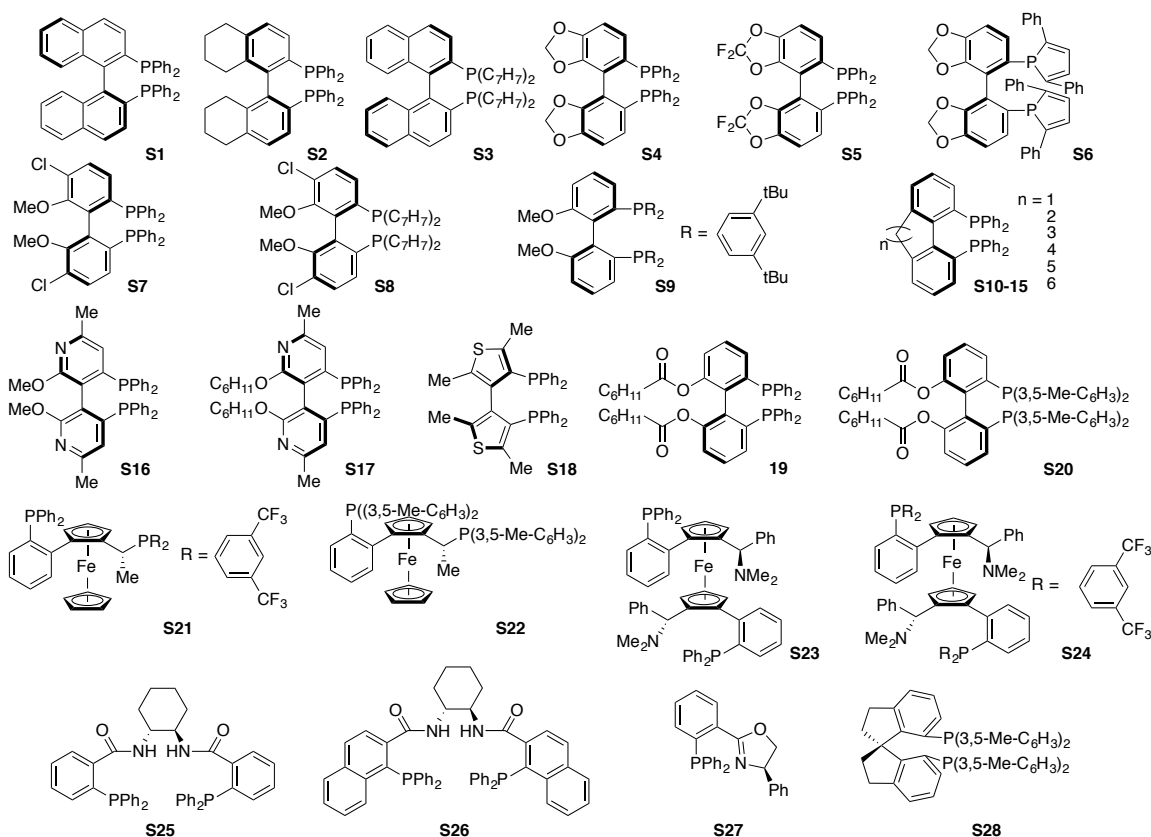

### General Procedure B for Three Component Coupling (Tables 2 and 3):

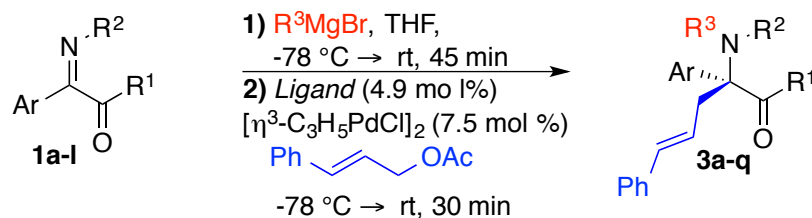

Rigorously anhydrous and air-free conditions are required for optimal results due to the reactivity of the intermediate enolate (see General Considerations).  $\alpha$ -Iminoester **1a-11** (0.372 mmol) was added to a flamed dried Schlenk flask that had been charged with a stir bar and was then vacuum-purged three times under argon. The  $\alpha$ -iminoester was dissolved in THF (2.0 mL) and cooled to  $-78\text{ }^{\circ}\text{C}$ . To this solution was added EtMgBr (3.0 M in Et<sub>2</sub>O, 198  $\mu\text{L}$ , 0.595 mmol) under argon. The mixture was slowly warmed to room temperature and allowed to stir for an additional 30 min at room temperature. A flame dried round bottom flask equipped with a stir bar was charged with  $[\eta^3\text{-C}_3\text{H}_5\text{PdCl}]_2$  (5.1 mg, 0.0140 mmol) and (*R*)-DIFLUORPHOS (12.7 mg, 0.0186 mmol) and vacuum-purged three times under argon. The mixture was dissolved with THF (2.0 mL) and cinnamyl acetate (66  $\mu\text{L}$ , 0.372 mmol) was added. The second solution was stirred for 5 minutes at ambient temperature under argon, cooled to  $-78\text{ }^{\circ}\text{C}$ , and added to the cooled ( $-78\text{ }^{\circ}\text{C}$ ) first solution via syringe. The combined mixture was allowed to warm to room temperature and stirred for 45 min. The resultant reaction mixture was quenched with satd NH<sub>4</sub>Cl (10 mL) and extracted with EtOAc (3 x 15 mL). The combined organic layers were washed

with brine, dried over Na<sub>2</sub>SO<sub>4</sub>, filtered and concentrated *in vacuo*. The resulting residue was purified by chromatography to afford pure  $\alpha$ -allyl- $\alpha$ -aryl  $\alpha$ -amino acids **3a-3q**.

**Notes:** Typical color after the first step is a translucent yellow and red to orange after the second step. An indicator of the first step not working is when the reaction color turns green or black. Grignard source was important. More than 1 equiv of cinnamyl acetate, or a ligand to palladium ratio greater than 1:1 was detrimental to the enantioselectivity of second step.

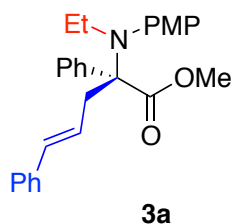

**(*S,E*)-Methyl 2-(ethyl(4-methoxyphenyl)amino)-2,5-diphenylpent-4-enoate (3a)** [Table 2, entry 2]. Following the general procedure B, 3.0 M EtMgBr (198  $\mu$ L, 0.595 mmol) was added to **1a** (100 mg, 0.372 mmol) in THF (2 mL), allowed to react for 45 min and subjected to a solution of  $[\eta^3\text{-C}_3\text{H}_5\text{PdCl}]_2$  (5.1 mg, 0.0140 mmol), *R*-DIFLUORPHOS (12.8 mg, 0.0186 mmol) and cinnamyl acetate (65 mg, 0.372 mmol) in THF (2 mL) for 45 min. After work-up, concentration and column chromatography (pre-wash SiO<sub>2</sub> with 5% NEt<sub>3</sub>/hexanes, eluent 3% EtOAc/hexanes) product **3a** (134 mg) was obtained in 87% yield as a yellow oil: <sup>1</sup>H NMR (500 MHz, CDCl<sub>3</sub>)  $\delta$  7.48 (d, *J* = 7.7 Hz, 2H), 7.36 (t, *J* = 7.7 Hz, 2H), 7.30-7.27 (m, 1H), 7.21 (t, *J* = 7.4 Hz, 2H), 7.17-7.12 (m, 3H), 7.09 (d, *J* = 7.2 Hz, 2H), 6.89 (d, *J* = 9.0 Hz, 2H), 5.89 (d, *J* = 16.0 Hz, 1H), 5.73 (dt, *J* = 15.9, 7.5 Hz, 1H), 3.88 (s, 3H), 3.83 (s, 3H), 3.09-3.02 (m, 1H), 2.99-2.92 (m, 1H), 2.63 (ddd, *J* = 13.9, 7.2, 0.5 Hz, 1H), 2.44 (ddd, *J* = 14.0, 7.4, 0.5 Hz, 1H), 0.83 (t, *J* = 7.0 Hz, 3H); <sup>13</sup>C NMR (125 MHz, CDCl<sub>3</sub>)  $\delta$  173.3, 157.8, 141.6, 139.1, 138.0, 133.0, 131.3, 128.4, 127.8 (2), 127.3, 127.0, 126.1 (2), 113.8, 75.1, 55.5, 51.4, 46.7, 44.4, 14.7; IR (film) 3026, 2694, 2836, 1724, 1603, 1507, 1244 cm<sup>-1</sup>; HRMS (ESI) calcd for C<sub>27</sub>H<sub>30</sub>NO<sub>3</sub> [M+H]<sup>+</sup> *m/z* = 416.2226; found 416.2229;  $[\alpha]_D^{24} = +145.3$  (c 0.28, 88% ee, CH<sub>2</sub>Cl<sub>2</sub>); chiral HPLC (IA, 97.5:2.5 hexanes:*i*-PrOH, 1 mL/min, 254 nm): *t*<sub>R</sub> of **3a**: 6.6 min (major) and 8.0 min (minor).

Ethylmagnesium Bromide from Aldrich was batch dependent and was only successful in general procedure B when it was colorless; EtMgBr from Acros was never colorless

**Ethylmagnesium Bromide.** Magnesium turnings (1.4 g, 58.3 mmol) were stirred in 2.0 M HCl (~15 mL) for ten minutes, filtered, washed with ethanol (~100 mL), Et<sub>2</sub>O (~150 mL), collected and dried under vacuum in a 50 °C oil bath for 2 h, and then added to a flame dried 50 mL Schlenk flask charged with a stir bar equipped with a reflux condenser under argon. Et<sub>2</sub>O (~3 mL) was added to magnesium. Bromoethane (4.58 mL, 61.4 mmol) and Et<sub>2</sub>O (6.14 mL) are added to a second flamed dried round bottom flask under argon. 500  $\mu$ L of the bromoethane solution is added to magnesium to initiate reflux. Et<sub>2</sub>O (5.5 mL) is added to the refluxing magnesium solution, followed by bromoethane

solution (500  $\mu\text{L}$ ), then  $\text{Et}_2\text{O}$  (5.5 mL). The bromoethane solution is then added dropwise while maintaining reflux ( $\sim 20$  min). After addition is complete, the mixture is heated to reflux for 30 min, allowed to cool to rt, and transferred via cannulation into a sealed flask under argon. The 3.0 M ethylmagnesium bromide solution in  $\text{Et}_2\text{O}$  is colorless and can be stored in a refrigerator for up to two weeks with continuous use.

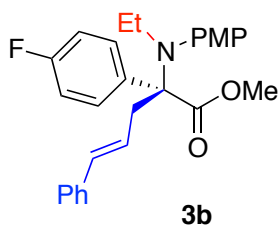

**(*S,E*)-Methyl 2-(N-ethyl-N-(4-methoxyphenyl)amino)-2-(4-fluorophenyl)-5-phenylpent-4-enoate (3b)** [Table 2, entry 3]. Following the general procedure B, 3.0 M  $\text{EtMgBr}$  (177  $\mu\text{L}$ , 0.532 mmol) was added to **1b** (76.3 mg, 0.266 mmol) in THF (1.5 mL), allowed to react for 45 min and subjected to a solution of  $[\eta^3\text{-C}_3\text{H}_5\text{PdCl}]_2$  (3.64 mg, 0.0098 mmol), *R*-DIFLUORPHOS (9.1 mg, 0.013 mmol) and cinnamyl acetate (46.8 mg, 0.266 mmol) in THF (1.5 mL) for 45 min. After work-up, concentration and chromatography (pre-wash  $\text{SiO}_2$  with 5%  $\text{NEt}_3$ /hexanes, eluent 3%  $\text{EtOAc}$ /hexanes) product **3b** (99 mg) was obtained in 86% yield as a yellow oil:  $^1\text{H}$  NMR (500 MHz,  $\text{CDCl}_3$ )  $\delta$  7.48-7.45 (m, 2H), 7.22 (t,  $J = 7.4$  Hz, 2H), 7.17-7.13 (m, 3H), 7.10 (d,  $J = 7.3$  Hz, 2H), 7.05 (t,  $J = 8.7$  Hz, 2H), 6.88 (d,  $J = 8.8$  Hz, 2H), 5.90 (d,  $J = 15.7$  Hz, 1H), 5.71 (dt,  $J = 15.7, 7.6$  Hz, 1H), 3.87 (s, 3H), 3.83 (s, 3H), 3.03-2.89 (m, 2H), 2.62 (dd,  $J = 13.7, 7.2$  Hz, 1H), 2.39 (dd,  $J = 13.7, 7.6$  Hz, 1H), 0.82 (t,  $J = 7.0$  Hz, 3H);  $^{13}\text{C}$  NMR (125 MHz,  $\text{CDCl}_3$ )  $\delta$  172.9, 162.9 (d,  $J = 246$  Hz), 157.9, 138.8, 137.8, 137.3 (d,  $J = 3.2$  Hz), 133.4, 131.2, 129.6 (d,  $J = 7.6$  Hz), 128.5, 127.1, 126.0, 125.6, 114.6 (d,  $J = 21.2$  Hz), 113.9, 74.6, 55.5, 51.5, 46.4, 44.4, 14.6; IR (film) 3036, 2965, 2837, 1727, 1606, 1505, 1244  $\text{cm}^{-1}$ ; HRMS (ESI) calcd for  $\text{C}_{27}\text{H}_{29}\text{FNO}_3$   $[\text{M}+\text{H}]^+$   $m/z = 434.2131$ ; found 434.2133;  $[\alpha]_D^{25} = +128.4$  (c 0.48, 86% ee,  $\text{CH}_2\text{Cl}_2$ ); chiral HPLC (IA, 97.5:2.5 hexanes:*i*-PrOH, 1 mL/min, 254 nm):  $t_R$  of **3b**: 6.6 min (major) and 11.7 min (minor).

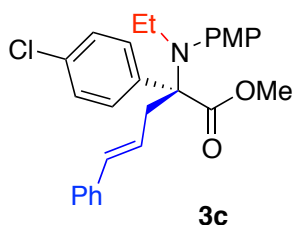

**(*S,E*)-Methyl 2-(N-ethyl-N-(4-methoxyphenyl)amino)-2-(4-chlorophenyl)-5-phenylpent-4-enoate (3c)** [Table 2, entry 4]. Following the general procedure B, 3.0 M  $\text{EtMgBr}$  (219  $\mu\text{L}$ , 0.658 mmol) was added to **1c** (100 mg, 0.329 mmol) in 2-MeTHF (2 mL), allowed to react for 45 min and subjected to a solution of  $[\eta^3\text{-C}_3\text{H}_5\text{PdCl}]_2$  (4.49 mg, 0.0123 mmol), *R*-DIFLUORPHOS (11.26 mg, 0.0165 mmol) and cinnamyl acetate (58 mg, 0.329 mmol) in 2-MeTHF (2 mL) for 45 min. After work-up, concentration and chromatography (pre-wash  $\text{SiO}_2$  with 5%  $\text{NEt}_3$ /hexanes, eluent 5%  $\text{EtOAc}$ /hexanes) product **3c** (124 mg) was obtained in 84% yield as a yellow oil:  $^1\text{H}$  NMR (500 MHz,  $\text{CDCl}_3$ )  $\delta$  7.42 (d,  $J = 8.6$  Hz, 2H), 7.32 (d,  $J = 8.6$  Hz, 2H), 7.22 (t,  $J = 7.4$  Hz, 2H),

7.16-7.08 (m, 5H), 6.87 (d,  $J = 8.7$  Hz, 2H), 5.90 (d,  $J = 15.8$  Hz, 1H), 5.68 (dt,  $J = 15.6$ , 7.3 Hz, 1H), 3.86 (s, 3H), 3.82 (s, 3H), 2.98-2.87 (m, 2H), 2.60 (dd,  $J = 14.0$ , 7.0 Hz, 1H), 2.37 (dd,  $J = 14.0$ , 7.3 Hz, 1H), 0.80 (t,  $J = 7.0$  Hz, 3H);  $^{13}\text{C}$  NMR (125 MHz,  $\text{CDCl}_3$ )  $\delta$  172.7, 158.0, 140.3, 138.7, 137.8, 133.5, 133.0, 131.2, 129.4, 128.5, 128.0, 127.1, 126.1, 125.4, 113.9, 74.7, 55.5, 51.6, 46.5, 44.3, 14.6; IR (film) 2958, 2855, 1725, 1604, 1507, 1244  $\text{cm}^{-1}$ ; HRMS (ESI) calcd for  $\text{C}_{27}\text{H}_{29}\text{ClNO}_3$   $[\text{M}+\text{H}]^+$   $m/z = 450.1836$ ; found 450.1835;  $[\alpha]_{\text{D}}^{25} = +117.2$  (c 0.37, 92% ee,  $\text{CH}_2\text{Cl}_2$ ); chiral HPLC (IA, 97.5:2.5 hexanes:*i*-PrOH, 1 mL/min, 254 nm):  $t_{\text{R}}$  of **3c**: 7.2 min (major) and 12.8 min (minor).

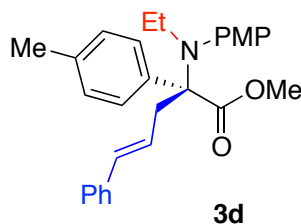

**(*S,E*)-Methyl 2-(*N*-ethyl-*N*-(4-methoxyphenyl)amino)-2-(4-methylphenyl)-5-phenylpent-4-enoate (**3d**) [Table 2, entry 5].** Following the general procedure B, 3.0 M EtMgBr (177  $\mu\text{L}$ , 0.532 mmol) was added to **1d** (75.4 mg, 0.266 mmol) in THF (1.5 mL), allowed to react for 45 min and subjected to a solution of  $[\eta^3\text{-C}_3\text{H}_5\text{PdCl}]_2$  (3.64 mg, 0.0010 mmol), *R*-DIFLUORPHOS (9.1 mg, 0.013 mmol) and cinnamyl acetate (46.8 mg, 0.266 mmol) in THF (1.5 mL) for 45 min. After work-up, concentration and chromatography (pre-wash  $\text{SiO}_2$  with 5%  $\text{NEt}_3$ /hexanes, eluent 3% EtOAc/hexanes) product **3d** (99 mg) was obtained in 87% yield as a yellow oil:  $^1\text{H}$  NMR (500 MHz,  $\text{CDCl}_3$ )  $\delta$  7.36 (d,  $J = 8.1$  Hz, 2H), 7.22 (t,  $J = 7.6$  Hz, 2H), 7.18- 7.13 (m, 5H), 7.11 (d,  $J = 7.9$  Hz, 2H), 6.88 (d,  $J = 8.8$  Hz, 2H), 5.93 (d,  $J = 15.7$  Hz, 1H), 5.75 (dt,  $J = 15.8$ , 7.2 Hz, 1H), 3.87 (s, 3H), 3.83 (s, 3H), 3.09-3.02 (m, 1H), 2.98-2.91 (m, 1H), 2.62 (dd,  $J = 13.9$ , 7.0 Hz, 1H), 2.44 (dd,  $J = 13.9$ , 7.3 Hz, 1H), 2.37 (s, 3H), 0.83 (t,  $J = 7.0$  Hz, 3H);  $^{13}\text{C}$  NMR (125 MHz,  $\text{CDCl}_3$ )  $\delta$  173.4, 157.8, 139.2, 138.5, 138.1, 136.9, 132.8, 131.3, 128.6, 128.4, 127.7, 126.9, 126.2 126.0, 113.8, 74.8, 55.5, 51.4, 46.6, 44.2, 21.2, 14.7; IR (film) 3026, 2963, 2865, 1724, 1605, 1508, 1244, 1036  $\text{cm}^{-1}$ ; HRMS (ESI) calcd for  $\text{C}_{28}\text{H}_{32}\text{NO}_3$   $[\text{M}+\text{H}]^+$   $m/z = 430.2382$ ; found 430.2369;  $[\alpha]_{\text{D}}^{25} = +123.1$  (c 0.47, 80% ee,  $\text{CH}_2\text{Cl}_2$ ); chiral HPLC (IA, 97.5:2.5 hexanes:*i*-PrOH, 1 mL/min, 254 nm):  $t_{\text{R}}$  of **3d**: 7.0 min (major) and 8.1 min (minor).

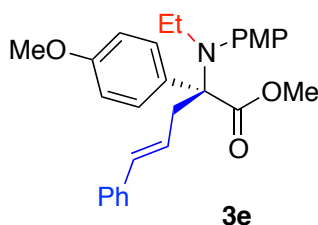

**(*S,E*)-Methyl 2-(*N*-ethyl-*N*-(4-methoxyphenyl)amino)-2-(4-methoxyphenyl)-5-phenylpent-4-enoate (**3e**) [Table 2, entry 6].** Following the general procedure B, 3.0 M EtMgBr (124  $\mu\text{L}$ , 0.372 mmol) was added to **1e** (56 mg, 0.186 mmol) in THF (1 mL), allowed to react for 45 min and subjected to a solution of  $[\eta^3\text{-C}_3\text{H}_5\text{PdCl}]_2$  (1.70 mg, 0.0047 mmol), *R*-BINAP (5.67 mg, 0.0091 mmol) and cinnamyl acetate (32 mg, 0.186 mmol) in THF (1 mL) for 45 min. After work-up, concentration and chromatography



(pre-wash SiO<sub>2</sub> with 5% NEt<sub>3</sub>/hexanes, eluent 5% EtOAc/hexanes) product **3e** (65 mg) was obtained in 79% yield as a yellow oil: <sup>1</sup>H NMR (500 MHz, CDCl<sub>3</sub>) δ 7.39 (d, *J* = 8.7 Hz, 2H), 7.21 (t, *J* = 7.5 Hz, 2H), 7.15-7.10 (m, 5H), 6.90-6.88 (m, 4H), 5.93 (d, *J* = 15.9 Hz, 1H), 5.73 (dt, *J* = 15.8, 7.3 Hz, 1H), 3.86 (s, 3H), 3.83 (s, 3H), 3.82 (s, 3H), 3.07-3.00 (m, 1H), 2.95-2.89 (m, 1H), 2.61 (dd, *J* = 13.9, 7.2 Hz, 1H), 2.41 (dd, *J* = 13.8, 7.3 Hz, 1H), 0.81 (t, *J* = 7.1 Hz, 3H); <sup>13</sup>C NMR (125 MHz, CDCl<sub>3</sub>) δ 173.4, 158.7, 157.8, 139.2, 138.0, 133.6, 132.9, 131.3, 129.0, 128.4, 126.9, 126.2, 126.1, 113.8, 113.2, 75.5, 55.5, 55.4, 51.4, 46.4, 44.3, 14.7; IR (film) 3035, 2960, 2836, 1724, 1609, 1508, 1245, 1036 cm<sup>-1</sup>; HRMS (ESI) calcd for C<sub>28</sub>H<sub>32</sub>NO<sub>4</sub> [M+H]<sup>+</sup> *m/z* = 446.2331; found 446.2325; [α]<sub>D</sub><sup>25</sup> = +126.1 (c 0.32, 74% ee, CH<sub>2</sub>Cl<sub>2</sub>); chiral HPLC (IA, 97.5:2.5 hexanes:*i*-PrOH, 1 mL/min, 254 nm): *t*<sub>R</sub> of **3e**: 10.4 min (major) and 12.4 min (minor).

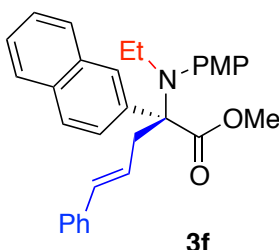

**(*S,E*)-Methyl 2-(*N*-ethyl-*N*-(4-methoxyphenyl)amino)-2-(naphthalen-2-yl)-5-phenylpent-4-enoate (**3f**)** [Table 2, entry 7]. Following the general procedure B, 3.0 M EtMgBr (177 μL, 0.532 mmol) was added to **1f** (85 mg, 0.266 mmol) in THF (1.5 mL), allowed to react for 45 min and subjected to a solution of [η<sup>3</sup>-C<sub>3</sub>H<sub>5</sub>PdCl]<sub>2</sub> (3.64 mg, 0.0010 mmol), *R*-DIFLUORPHOS (9.1 mg, 0.013 mmol) and cinnamyl acetate (46.8 mg, 0.266 mmol) in THF (1.5 mL) for 45 min. After work-up, concentration and chromatography (pre-wash SiO<sub>2</sub> with 5% NEt<sub>3</sub>/hexanes, eluent 3% acetone/hexanes) product **3f** (89 mg) was obtained in 72% yield as a yellow oil. Absolute configuration was determined by the x-ray structure obtained from >99% ee material by stirring the 84% ee solid in hexanes and then removing the liquid three times, the enhanced ee solid was recrystallized from Et<sub>2</sub>O over 24 h of slow evaporation. mp (>99% ee material) = 104 °C. <sup>1</sup>H NMR (500 MHz, CDCl<sub>3</sub>) δ 7.91-7.85 (m, 4H), 7.73 (d, *J* = 8.7 Hz, 1H), 7.51-7.49 (m, 2H), 7.23 (d, *J* = 8.7 Hz, 2H), 7.18 (t, *J* = 7.3 Hz, 2H), 7.12 (t, *J* = 6.9 Hz, 1H), 7.04 (d, *J* = 7.8 Hz, 2H), 6.92 (d, *J* = 8.5 Hz, 2H), 5.95 (d, *J* = 15.8 Hz, 1H), 5.75 (dt, *J* = 15.8 Hz, 7.1 Hz, 1H), 3.93 (s, 3H), 3.85 (s, 3H), 3.12-2.98 (m, 2H), 2.75 (dd, *J* = 13.8, 7.2 Hz, 1H), 2.59 (dd, *J* = 13.6, 7.3 Hz, 1H), 0.87 (t, *J* = 6.9 Hz, 3H); <sup>13</sup>C NMR (125 MHz, CDCl<sub>3</sub>) δ 173.2, 157.9, 139.2, 139.1, 137.9, 133.1, 133.0, 132.9, 131.4, 128.5, 128.4 (2), 127.6, 127.4, 127.0, 126.9, 126.1 (3), 126.0, 113.9, 75.2, 55.5, 51.5, 46.7, 44.1, 14.7; IR (film) 3056, 2964, 2835, 1724, 1600, 1242, 1036 cm<sup>-1</sup>; HRMS (ESI) calcd for C<sub>31</sub>H<sub>32</sub>NO<sub>3</sub> [M+H]<sup>+</sup> *m/z* = 466.2382; found 466.2371; [α]<sub>D</sub><sup>25</sup> = +137.5 (c 0.43, 86% ee, CH<sub>2</sub>Cl<sub>2</sub>); chiral HPLC (IA, 97.5:2.5 hexanes:*i*-PrOH, 1 mL/min, 254 nm): *t*<sub>R</sub> of **3f**: 9.9 min (minor) and 10.7 min (major).

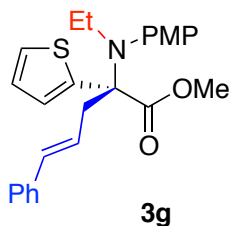

**(S,E)-Methyl 2-(N-ethyl-N-(4-methoxyphenyl)amino)-2-(thiophen-2-yl)-5-phenylpent-4-enoate (3g)** [Table 2, entry 8]. Following the general procedure B, 3.0 M EtMgBr (177  $\mu$ L, 0.532 mmol) was added to **1g** (73.2 mg, 0.266 mmol) in THF (1.5 mL), allowed to react for 45 min and subjected to a solution of  $[\eta^3\text{-C}_3\text{H}_5\text{PdCl}]_2$  (3.64 mg, 0.0098 mmol), *R*-DIFLUORPHOS (9.1 mg, 0.013 mmol) and cinnamyl acetate (46.8 mg, 0.266 mmol) in THF (1.5 mL) for 45 min. After work-up, concentration and column chromatography (pre-wash SiO<sub>2</sub> with 5% NEt<sub>3</sub>/hexanes, eluent 5% EtOAc/hexanes) product **3g** (96 mg) was obtained in 86% yield as a yellow oil: <sup>1</sup>H NMR (500 MHz, CDCl<sub>3</sub>)  $\delta$  7.27-7.26 (m, 1H), 7.24-7.19 (m, 4H), 7.17-7.14 (m, 3H), 7.07 (d, *J* = 3.7 Hz, 1H), 6.97-6.95 (m, 1H), 6.87 (d, *J* = 8.5 Hz, 2H), 6.07 (d, *J* = 15.9 Hz, 1H), 5.75 (dt, *J* = 15.9, 7.3 Hz, 1H), 3.85 (s, 3H), 3.82 (s, 3H), 3.17-3.10 (m, 1H), 3.04-2.98 (m, 1H), 2.63 (dd, *J* = 13.4, 7.7 Hz, 1H), 2.47 (dd, *J* = 13.4, 7.1 Hz, 1H), 0.85 (t, *J* = 7.0 Hz, 3H); <sup>13</sup>C NMR (125 MHz, CDCl<sub>3</sub>)  $\delta$  172.3, 157.9, 148.1, 138.4, 137.7, 133.4, 131.3, 128.5, 127.2, 126.9, 126.4, 126.2, 125.2, 124.6, 113.7, 72.9, 55.5, 51.8, 46.2, 45.6 14.3; IR (film) 3027, 2970, 2835, 1729, 1605, 1507, 1243 cm<sup>-1</sup>; HRMS (ESI) calcd for C<sub>25</sub>H<sub>28</sub>NO<sub>3</sub> [M+H]<sup>+</sup> *m/z* = 422.1750; found 422.1807;  $[\alpha]_D^{25}$  = +120.2 (c 0.34, 76% ee, CH<sub>2</sub>Cl<sub>2</sub>); chiral HPLC (IA, 97.5:2.5 hexanes:*i*-PrOH, 1 mL/min, 254 nm): *t<sub>R</sub>* of **3g**: 7.2 min (minor) and 7.8 min (major).

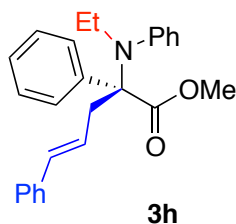

**(S,E)-Methyl 2-(N-ethyl-N-phenylamino)-2,5-diphenylpent-4-enoate (3h)** [Table 2, entry 9]. Following the general procedure B, 3.0 M EtMgBr (177  $\mu$ L, 0.532 mmol) was added to **1h** (64 mg, 0.266 mmol) in THF (1.5 mL), allowed to react for 45 min and subjected to a solution of  $[\eta^3\text{-C}_3\text{H}_5\text{PdCl}]_2$  (3.64 mg, 0.0098 mmol), *R*-DIFLUORPHOS (9.1 mg, 0.013 mmol) and cinnamyl acetate (46.8 mg, 0.266 mmol) in THF (1.5 mL) for 45 min. After work-up, concentration and column chromatography (pre-wash SiO<sub>2</sub> with 5% NEt<sub>3</sub>/hexanes, eluent 3% EtOAc/hexanes) product **3h** (80 mg) was obtained in 78% yield as a yellow oil: <sup>1</sup>H NMR (500 MHz, CDCl<sub>3</sub>)  $\delta$  7.51 (d, *J* = 8.0 Hz, 2H), 7.38-7.34 (m, 4H), 7.29 (dt, *J* = 7.3 Hz, 0.4 Hz, 1H), 7.25-7.20 (m, 5H), 7.15 (t, *J* = 7.3 Hz, 1H), 7.10 (d, *J* = 7.7 Hz, 2H), 5.91 (d, *J* = 15.8 Hz, 1H), 5.75 (dt, *J* = 15.8, 7.2 Hz, 1H), 3.87 (s, 3H), 3.16-3.03 (m, 2H), 2.68 (dd, *J* = 13.8, 7.1 Hz, 1H), 2.51 (dd, *J* = 13.7, 7.5 Hz, 1H), 0.87 (t, *J* = 7.0 Hz, 3H); <sup>13</sup>C NMR (125 MHz, CDCl<sub>3</sub>)  $\delta$  173.2, 146.6, 141.5, 137.9, 133.1, 129.9, 128.7, 128.4, 127.9, 127.9, 127.4, 126.9, 126.1, 125.9, 125.9, 75.0, 51.5, 46.4, 44.2, 14.7; IR (film) 3025, 2867, 1725, 1595, 1493, 1215 cm<sup>-1</sup>; HRMS (ESI) calcd for C<sub>26</sub>H<sub>28</sub>NO<sub>2</sub> [M+H]<sup>+</sup> *m/z* = 386.2120; found 386.2132;  $[\alpha]_D^{25}$  = +162.9 (c 0.47, 82%

ee, CH<sub>2</sub>Cl<sub>2</sub>); chiral HPLC (IA, 97.5:2.5 hexanes:*i*-PrOH, 1 mL/min, 254 nm): *t*<sub>R</sub> of **3h**: 4.8 min (minor) and 5.1 min (major).

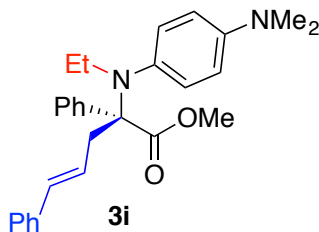

**(*S,E*)-Methyl 2-((4-(dimethylamino)phenyl)(ethyl)amino)-2,5-diphenylpent-4-enoate (3i)** [Table 2, entry 10]. Following the general procedure B, 3.0 M EtMgBr (100  $\mu$ L, 0.298 mmol) was added to **1i** (53 mg, 0.186 mmol) in THF (1 mL), allowed to react for 45 min and subjected to a solution of  $[\eta^3\text{-C}_3\text{H}_5\text{PdCl}]_2$  (3.7 mg, 0.0093 mmol), *R*-BINAP (11.6 mg, 0.0186 mmol) and cinnamyl acetate (34 mg, 0.195 mmol) in THF (1 mL) for 45 min. After work-up, concentration and column chromatography (eluent 7% EtOAc/hexanes) product **3i** (62 mg) was obtained in 74% yield as a yellow oil: <sup>1</sup>H NMR (500 MHz, (CD<sub>3</sub>)<sub>2</sub>CO)  $\delta$  7.50 (d, *J* = 7.9 Hz, 2H), 7.33 (t, *J* = 7.6 Hz, 2H), 7.24 (t, *J* = 7.4 Hz, 1H), 7.18 (t, *J* = 7.4 Hz, 2H), 7.14-7.07 (m, 5H), 6.73 (d, *J* = 8.9 Hz, 2H), 5.88-5.79 (m, 2H), 3.87 (s, 3H), 3.02-2.93 (m, 8H), 2.61 (dd, *J* = 14.2, 6.1 Hz, 1H), 2.43 (dd, *J* = 14.2, 6.1 Hz, 1H), 0.79 (t, *J* = 7.1 Hz, 3H); <sup>13</sup>C NMR (125 MHz, (CD<sub>3</sub>)<sub>2</sub>CO)  $\delta$  173.6, 150.2, 143.0, 138.8, 135.9, 133.2, 131.6, 129.1, 128.6, 128.4, 127.9, 127.6, 127.2, 126.6, 113.2, 75.9, 51.5, 47.2, 45.3, 40.7, 15.0; chiral HPLC (IA, 97.5:2.5 hexanes:*i*-PrOH, 1 mL/min, 254 nm): *t*<sub>R</sub> of **3i**: 5.7 min (minor) and 6.4 min (major).

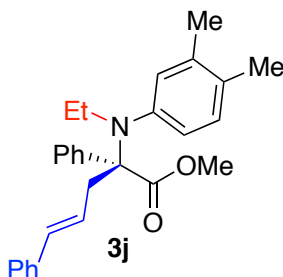

**(*S,E*)-methyl 2-((3,4-dimethylphenyl)(ethyl)amino)-2,5-diphenylpent-4-enoate (3j)** [Table 2, entry 11]. Following the general procedure B, 3.0 M EtMgBr (100  $\mu$ L, 0.298 mmol) was added to **1j** (50 mg, 0.186 mmol) in THF (1.3 mL), allowed to react for 45 min and subjected to a solution of  $[\eta^3\text{-C}_3\text{H}_5\text{PdCl}]_2$  (1.72 mg, 0.005 mmol), *R*-BINAP (5.9 mg, 0.009 mmol) and cinnamyl acetate (36 mg, 0.195 mmol) in THF (1 mL) for 45 min. After work-up, concentration and column chromatography (eluent 10% Acetone/hexanes) product **3j** (65 mg) was obtained in 84% yield as a yellow oil: <sup>1</sup>H NMR (500 MHz, (CDCl<sub>3</sub>))  $\delta$  7.48 (d, *J* = 7.4 Hz, 2H), 7.35 (t, *J* = 7.7 Hz, 2H), 7.28 (d, *J* = 7.3 Hz, 1H), 7.20 (t, *J* = 7.5 Hz, 2H), 7.14-7.06 (m, 4H), 6.99 (s, 1H), 6.94 (d, *J* = 7.9 Hz, 1H), 5.88 (d, *J* = 15.8 Hz, 1H), 5.72 (dt, *J* = 15.8 Hz, 7.3 Hz, 1H), 3.87 (s, 3H), 3.08-2.95 (m, 2H), 2.63 (dd, *J* = 13.7, 7.0 Hz, 1H), 2.45 (dd, *J* = 13.7, 7.4 Hz, 1H), 2.27 (s, 3H), 2.26 (s, 3H), 0.83 (t, *J* = 7.1 Hz, 3H); <sup>13</sup>C NMR (125 MHz, (CDCl<sub>3</sub>))  $\delta$  173.2, 144.1, 141.7, 138.0, 136.7, 134.5, 132.9, 131.5, 129.8, 128.4, 127.9, 127.8, 127.3, 127.2, 126.9, 126.2, 126.1,

75.1, 51.4, 46.4, 44.4, 20.1, 19.5, 14.8; chiral HPLC (IA, 99:1 hexanes:*i*-PrOH, 0.5 mL/min, 254 nm):  $t_R$  of **3j**: 8.5 min (minor) and 8.9 min (major).

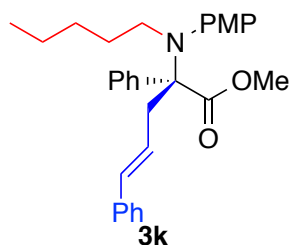

**(*S,E*)-Methyl 2-(N-pentyl-N-(4-methoxyphenyl)amino)-2,5-diphenylpent-4-enoate (3k)** [Table 3, entry 1]. Following the general procedure B, 2.0 M pentylMgBr (300  $\mu$ L, 0.600 mmol) was added to **1a** (81 mg, 0.300 mmol) in THF (1.9 mL), allowed to react for 45 min and subjected to a solution of  $[\eta^3\text{-C}_3\text{H}_5\text{PdCl}]_2$  (4.12 mg, 0.0113 mmol), *R*-DIFLUORPHOS (10.25 mg, 0.0150 mmol) and cinnamyl acetate (53 mg, 0.300 mmol) in THF (1.9 mL) for 45 min. After work-up, concentration and chromatography (pre-wash  $\text{SiO}_2$  with 5%  $\text{NEt}_3$ /hexanes, eluent 3% EtOAc/hexanes) product **3k** (112 mg) was obtained in 82% yield as a yellow oil:  $^1\text{H NMR}$  (500 MHz,  $\text{CDCl}_3$ )  $\delta$  7.47 (d,  $J = 7.6$  Hz, 2H), 7.35 (t,  $J = 7.6$  Hz, 2H), 7.28 (d,  $J = 7.3$  Hz, 1H), 7.20 (t,  $J = 7.5$  Hz, 2H), 7.16-7.13 (m, 3H), 7.07 (d,  $J = 7.1$  Hz, 2H), 6.87 (d,  $J = 8.9$  Hz, 2H), 5.89 (d,  $J = 15.9$  Hz, 1H), 5.70 (dt,  $J = 15.7, 7.3$  Hz, 1H), 3.86 (s, 3H), 3.82 (s, 3H), 2.97-2.87 (m, 2H), 2.62 (dd,  $J = 13.4, 7.2$  Hz, 1H), 2.43 (dd,  $J = 13.4, 7.2$  Hz, 1H), 1.17-1.04 (m, 6H), 0.77 (t,  $J = 6.9$  Hz, 3H);  $^{13}\text{C NMR}$  (125 MHz,  $\text{CDCl}_3$ )  $\delta$  173.1, 157.8, 141.5, 139.6, 138.0, 132.9, 131.1, 128.4, 128.0, 127.8, 127.3, 126.9, 126.2, 126.1, 113.8, 75.1, 55.5, 52.2, 51.4, 44.5, 29.3, 29.0, 22.6, 14.1; IR (film) 3025, 2857, 1725, 1603, 1508, 1245  $\text{cm}^{-1}$ ; HRMS (ESI) calcd for  $\text{C}_{30}\text{H}_{36}\text{NO}_3$   $[\text{M}+\text{H}]^+$   $m/z = 458.2695$ ; found 458.2704;  $[\alpha]_D^{25} = +129.1$  (c 0.30, 92% ee,  $\text{CH}_2\text{Cl}_2$ ); chiral HPLC (IA, 97.5:2.5 hexanes:*i*-PrOH, 1 mL/min, 254 nm):  $t_R$  of **3k**: 5.8 min (major) and 7.0 min (minor).

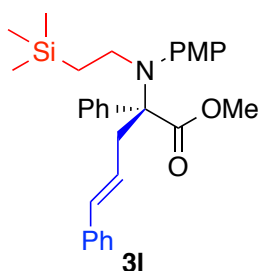

**(*S,E*)-Methyl 2-(N-(2-(trimethylsilyl)ethyl)-N-(4-methoxyphenyl)amino)-2,5-diphenylpent-4-enoate (3l)** [Table 3, entry 2]. Following the general procedure B, 1.38 M 2-(trimethylsilyl)ethylMgBr (269  $\mu$ L, 0.372 mmol) was added to **1a** (50 mg, 0.186 mmol) in THF (1.0 mL), allowed to react for 45 min providing a yellow mixture, which is subjected to a solution of  $[\eta^3\text{-C}_3\text{H}_5\text{PdCl}]_2$  (1.70 mg, 0.00465 mmol), *R*-BINAP (5.67 mg, 0.00911 mmol) and cinnamyl acetate (32 mg, 0.182 mmol) in THF (1.0 mL) for 45 min, providing an orange mixture. After work-up, concentration and chromatography (pre-wash  $\text{SiO}_2$  with 5%  $\text{NEt}_3$ /hexanes, eluent 5% EtOAc/hexanes) product **3l** (75 mg) was obtained in 83% yield as a yellow oil:  $^1\text{H NMR}$  (500 MHz,  $\text{CDCl}_3$ )  $\delta$  7.45 (d,  $J = 7.9$

Hz, 2H), 7.34 (t,  $J = 7.6$  Hz, 2H), 7.29-7.26 (m, 1H), 7.21 (t,  $J = 7.6$  Hz, 2H), 7.15-7.13 (m, 3H), 7.08 (d,  $J = 7.7$  Hz, 2H), 6.88 (d,  $J = 8.7$  Hz, 2H), 5.89 (d,  $J = 15.9$  Hz, 1H), 5.75 (dt,  $J = 15.7, 7.4$  Hz, 1H), 3.87 (s, 3H), 3.83 (s, 3H), 3.06-2.99 (m, 1H), 2.96-2.90 (m, 1H), 2.64 (dd,  $J = 13.8, 7.0$  Hz, 1H), 2.46 (dd,  $J = 13.8, 7.5$  Hz, 1H), 0.57-0.47 (m, 2H), -0.18 (s, 9H);  $^{13}\text{C}$  NMR (125 MHz,  $\text{CDCl}_3$ )  $\delta$  173.3, 157.8, 141.5, 139.3, 138.0, 132.9, 131.4, 128.4, 127.9, 127.8, 127.3, 126.9, 126.2, 126.1, 113.8, 75.2, 55.5, 51.4, 47.9, 44.3, 17.8, -1.6; IR (film) 3026, 2951, 1725, 1602, 1507, 1246  $\text{cm}^{-1}$ ; HRMS (ESI) calcd for  $\text{C}_{30}\text{H}_{38}\text{NO}_3\text{Si}$   $[\text{M}+\text{H}]^+$   $m/z = 488.2621$ ; found 488.2617;  $[\alpha]_{\text{D}}^{25} = +118.7$  (c 0.25, 82% ee,  $\text{CH}_2\text{Cl}_2$ ); chiral HPLC (IA, 97.5:2.5 hexanes:*i*-PrOH, 1 mL/min, 254 nm):  $t_{\text{R}}$  of **3l**: 4.9 min (major) and 6.4 min (minor).

**2-(trimethylsilyl)ethylMgBr** was prepared by modification of a known procedure<sup>4</sup>: Magnesium ribbon (255 mg, 8.85 mmol) that was scored until shiny was added to a flame dried 10 mL Schlenk flask charged with a stir bar equipped with a reflux condenser under argon.  $\text{Et}_2\text{O}$  (2.95 mL) was added to magnesium. Freshly prepared 2-(trimethylsilyl)ethyl bromide<sup>5</sup> is added dropwise to magnesium at a rate to sustain a slow reflux. After addition is complete, the mixture is heated to reflux for 2 h, allowed to cool to rt and used in preparation of **3l**.

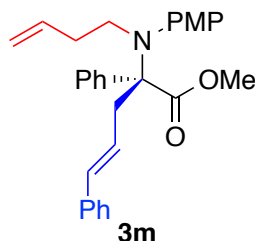

**(*S,E*)-Methyl 2-(*N*-(but-3-en-1-yl)-*N*-(4-methoxyphenyl)amino)-2,5-diphenylpent-4-enoate (**3m**)** [Table 3, entry 3]. Following the general procedure B, 2.7 M butenylMgBr (222  $\mu\text{L}$ , 0.600 mmol) was added to **1a** (81 mg, 0.300 mmol) in THF (1.9 mL), allowed to react for 45 min providing a yellow/orange mixture, which is subjected to a solution of  $[\eta^3\text{-C}_3\text{H}_5\text{PdCl}]_2$  (4.12 mg, 0.0113 mmol), *R*-DIFLUORPHOS (10.25 mg, 0.0150 mmol) and cinnamyl acetate (53 mg, 0.300 mmol) in THF (1.9 mL) for 45 min, providing an orange mixture. After work-up, concentration and chromatography (pre-wash  $\text{SiO}_2$  with 5%  $\text{NEt}_3$ /hexanes, eluent 2% acetone/hexanes) product **3m** (109 mg) was obtained in 82% yield as a yellow oil:  $^1\text{H}$  NMR (500 MHz,  $\text{CDCl}_3$ )  $\delta$  7.46 (d,  $J = 7.6$  Hz, 2H), 7.36-7.33 (m, 2H), 7.28 (d,  $J = 7.2$  Hz, 1H), 7.22-7.13 (m, 5H), 7.07 (d,  $J = 7.6$  Hz, 2H), 6.88 (d,  $J = 8.8$  Hz, 2H), 5.89 (d,  $J = 15.8$  Hz, 1H), 5.72-5.60 (m, 2H), 4.89-4.83 (m, 2H), 3.87 (s, 3H), 3.83 (s, 3H), 3.06-2.98 (m, 2H), 2.62 (dd,  $J = 13.9, 7.2$  Hz, 1H), 2.43 (dd,  $J = 13.9, 7.6$  Hz, 1H), 2.05-1.92 (m, 2H);  $^{13}\text{C}$  NMR (125 MHz,  $\text{CDCl}_3$ )  $\delta$  173.1, 158.0, 141.3, 139.2, 138.0, 136.8, 133.0, 131.2, 128.4, 128.0, 127.9, 127.8, 127.4, 126.9, 126.1, 115.5, 113.9, 75.1, 55.5, 51.8, 51.5, 44.5, 33.9; IR (film) 3025, 2836, 1724, 1604, 1507, 1245  $\text{cm}^{-1}$ ; HRMS (ESI) calcd for  $\text{C}_{29}\text{H}_{32}\text{NO}_3$   $[\text{M}+\text{H}]^+$   $m/z = 442.2382$ ; found 442.2400;  $[\alpha]_{\text{D}}^{25} = +137.8$  (c 0.42, 90% ee,  $\text{CH}_2\text{Cl}_2$ ); chiral HPLC (IA, 97.5:2.5 hexanes:*i*-PrOH, 1 mL/min, 254 nm):  $t_{\text{R}}$  of **3m**: 7.3 min (major) and 10.9 min (minor).

**Butenylmagnesium Bromide.** Magnesium ribbon (255 mg, 8.85 mmol) that was scored until shiny was added to a flame dried 10 mL Schlenk flask charged with a stir bar equipped with a reflux condenser under argon. Et<sub>2</sub>O (2.95 mL) was added to magnesium. Freshly distilled (98 °C, 760 torr) butenyl bromide is added drop wise to magnesium at a rate to sustain a slow reflux. After addition is complete, the mixture is heated to reflux for 2 h, allowed to cool to rt, and used in preparation of **3m**.

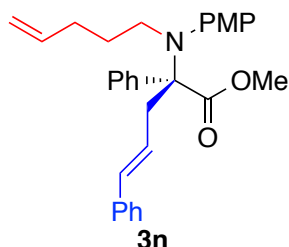

**(*S,E*)-Methyl 2-(*N*-(pent-4-en-1-yl)-*N*-(4-methoxyphenyl)amino)-2,5-diphenylpent-4-enoate (**3n**)** [Table 3, entry 4]. Following the general procedure B, 2.8 M pentenylMgBr (213  $\mu$ L, 0.595 mmol) was added to **1a** (80 mg, 0.297 mmol) in CPME (1.6 mL), allowed to react for 45 min providing a yellow/orange mixture, which is subjected to a solution of [ $\eta^3$ -C<sub>3</sub>H<sub>5</sub>PdCl]<sub>2</sub> (4.1 mg, 0.0112 mmol), *R*-DIFLUORPHOS (10.2 mg, 0.0149 mmol) and cinnamyl acetate (52 mg, 0.299 mmol) in CPME (1.6 mL) for 45 min, providing an orange/red mixture. After work-up, concentration and column chromatography (pre-wash SiO<sub>2</sub> with 5% NEt<sub>3</sub>/hexanes, eluent 3% acetone/hexanes) product **3n** (115 mg) was obtained in 85% yield as a yellow oil: <sup>1</sup>H NMR (500 MHz, CDCl<sub>3</sub>)  $\delta$  7.47 (d, *J* = 7.9 Hz, 2H), 7.38-7.06 (m, 10H), 6.88 (d, *J* = 8.9 Hz, 2H), 5.91 (d, *J* = 15.7 Hz, 1H), 5.75-5.58 (m, 2H), 4.90-4.81 (m, 2H), 3.87 (s, 3H), 3.83 (s, 3H), 2.96 (t, *J* = 7.7 Hz, 2H), 2.64 (dd, *J* = 13.5, 6.9 Hz, 1H), 2.44 (dd, *J* = 13.7, 7.1 Hz, 1H), 1.97-1.78 (m, 2H), 1.42-1.22 (m, 2H); <sup>13</sup>C NMR (125 MHz, CDCl<sub>3</sub>)  $\delta$  173.0, 157.9, 141.4, 139.4, 138.8, 138.0, 133.0, 131.1, 128.4, 128.0, 127.9, 127.4, 126.9, 126.1, 126.0, 114.2, 113.9, 75.1, 55.5, 51.9, 51.4, 44.4, 31.3, 28.6; IR (film) 3026, 2856, 1725, 1604, 1508, 1245 cm<sup>-1</sup>; HRMS (ESI) calcd for C<sub>30</sub>H<sub>34</sub>NO<sub>3</sub> [M+H]<sup>+</sup> *m/z* = 456.2539; found 456.2536; [ $\alpha$ ]<sub>D</sub><sup>24</sup> = +130.4 (c 0.29, 86% ee, CH<sub>2</sub>Cl<sub>2</sub>); chiral HPLC (IA, 97.5:2.5 hexanes:*i*-PrOH, 1 mL/min, 254 nm): *t*<sub>R</sub> of **3n**: 6.2 min (major) and 7.6 min (minor).

**Pentenylmagnesium Bromide.** Cut magnesium ribbon (261 mg, 10.9 mmol) that was scored until shiny was added to a flame dried 10 mL Schlenk flask charged with a stir bar equipped with a reflux condenser under argon. Et<sub>2</sub>O (3.02 mL) was added to magnesium. Freshly distilled (124-126 °C, 760 torr) pentenyl bromide is added drop wise to magnesium at a rate to sustain a slow reflux. After addition is complete, the mixture is heated to reflux for 2 h, allowed to cool to rt, and used in preparation of **3n**.

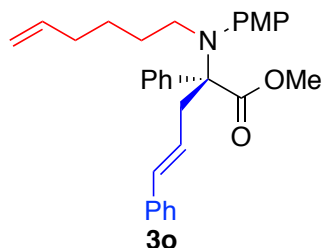



**(*S,E*)-Methyl 2-(*N*-(hex-5-en-1-yl)-*N*-(4-methoxyphenyl)amino)-2,5-diphenylpent-4-enoate (**3o**)** [Table 3, entry 5]. Following the general procedure B, 1.5 M hexenylMgBr (355  $\mu$ L, 0.532 mmol) was added to **1a** (72 mg, 0.266 mmol) in 2-MeTHF (1.5 mL), allowed to react for 45 min providing a yellow mixture, which is subjected to a solution of  $[\eta^3\text{-C}_3\text{H}_5\text{PdCl}]_2$  (3.58 mg, 0.0098 mmol), *R*-DIFLUORPHOS (8.09 mg, 0.013 mmol) and cinnamyl acetate (46.8 mg, 0.266 mmol) in 2-MeTHF (1.5 mL) for 45 min, providing an orange mixture. After work-up, concentration and chromatography (pre-wash SiO<sub>2</sub> with 5% NEt<sub>3</sub>/hexanes, eluent 3% EtOAc/hexanes) product **3o** (105 mg) was obtained in 84% yield as a yellow oil: <sup>1</sup>H NMR (500 MHz, CDCl<sub>3</sub>)  $\delta$  7.48 (d, *J* = 7.6 Hz, 2H), 7.36 (t, *J* = 7.6 Hz, 2H), 7.30-7.27 (m, 1H), 7.21 (t, *J* = 7.3 Hz, 2H), 7.17-7.13 (m, 3H), 7.08 (d, *J* = 7.9 Hz, 2H), 6.88 (d, *J* = 8.8 Hz, 2H), 5.90 (d, *J* = 16 Hz, 1H), 5.74-5.65 (m, 2H), 4.91-4.86 (m, 2H), 3.87 (s, 3H), 3.83 (s, 3H), 2.99-2.90 (m, 2H), 2.63 (dd, *J* = 13.8, 7.1 Hz, 1H), 2.44 (dd, *J* = 13.5, 7.1 Hz, 1H), 1.89-1.85 (m, 2H), 1.27-1.18 (m, 4H); <sup>13</sup>C NMR (125 MHz, CDCl<sub>3</sub>)  $\delta$  173.0, 157.9, 141.5, 139.5, 139.0, 138.0, 132.9, 131.1, 128.4, 128.0, 127.8, 127.4, 126.9, 126.1, 126.1, 114.3, 113.8, 75.1, 55.5, 52.1, 51.4, 44.5, 33.7, 28.8, 26.3; IR (film) 3025, 2856, 1725, 1604, 1508, 1245, 1036 cm<sup>-1</sup>; HRMS (ESI) calcd for C<sub>31</sub>H<sub>36</sub>NO<sub>3</sub> [M+H]<sup>+</sup> *m/z* = 470.2695; found 470.2693;  $[\alpha]_D^{25}$  = +129.0 (c 0.41, 80% ee, CH<sub>2</sub>Cl<sub>2</sub>); chiral HPLC (IA, 97.5:2.5 hexanes:*i*-PrOH, 1 mL/min, 254 nm): *t*<sub>R</sub> of **3o**: 6.0 min (major) and 7.5 min (minor).

**Hexenylmagnesium Bromide.** Magnesium ribbon (144 mg, 6 mmol) that was scored until shiny was added to a flame dried 10 mL Schlenk flask charged with a stir bar equipped with a reflux condenser under argon. THF (3.33 mL) was added to magnesium. Freshly distilled (25 °C, 0.01 torr) hexenyl bromide is added drop wise to magnesium at a rate to sustain a slow reflux. After addition is complete, the mixture is heated to reflux for 2 h. allowed to cool to rt, and used in preparation of **3o**.

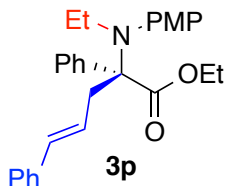

**(*S,E*)-Ethyl 2-(ethyl(4-methoxyphenyl)amino)-2,5-diphenylpent-4-enoate (**3p**)** Following the general procedure B, 3.0 M EtMgBr (85  $\mu$ L, 0.282 mmol) was added to **1k** (50 mg, 0.177 mmol) in THF (1.3 mL), allowed to react for 45 min and subjected to a solution of  $[\eta^3\text{-C}_3\text{H}_5\text{PdCl}]_2$  (1.63 mg, 0.005 mmol), *R*-BINAP (5.5 mg, 0.009 mmol) and cinnamyl acetate (34 mg, 0.195 mmol) in THF (1 mL) for 45 min. After work-up, concentration and column chromatography (pre-wash SiO<sub>2</sub> with 5% NEt<sub>3</sub>/hexanes, eluent 7% EtOAc/hexanes) product **3p** (62 mg) was obtained in 77% yield as a yellow oil: <sup>1</sup>H NMR (500 MHz, CDCl<sub>3</sub>)  $\delta$  7.49 (d, *J* = 7.5 Hz, 2H), 7.35 (t, *J* = 7.7 Hz, 2H), 7.28 (d, *J* = 7.3 Hz, 1H), 7.22-7.16 (m, 4H), 7.13 (t, *J* = 7.4 Hz, 1H), 7.08 (d, *J* = 7.3 Hz, 2H), 6.87 (d, *J* = 8.6 Hz, 2H), 5.89 (d, *J* = 15.8 Hz, 1H), 5.72 (dt, *J* = 15.9, 7.2 Hz, 1H), 4.42-4.31 (m, 2H), 3.83 (s, 3H), 3.08-2.96 (m, 2H), 2.62 (dd, *J* = 13.9, 7.1 Hz, 1H), 2.42 (dd, *J* = 13.9, 7.2 Hz, 1H), 1.36 (t, *J* = 7.2 Hz, 3H), 0.83 (t, *J* = 6.9 Hz, 3H); <sup>13</sup>C NMR (125 MHz, CDCl<sub>3</sub>)  $\delta$  172.7, 157.8, 141.8, 139.2, 138.0, 132.9, 131.4, 128.4, 127.9, 127.8, 127.2, 126.9, 126.2, 126.0, 113.8, 74.9, 60.7, 55.5, 46.7, 44.4, 14.7, 14.5; chiral HPLC (OD,

97.5:2.5 hexanes:*i*-PrOH, 1.0 mL/min, 254 nm):  $t_R$  of **3p**: 4.5 min (major) and 8.3 min (minor).

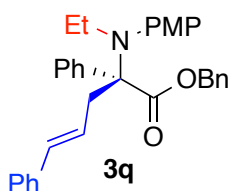

**(*S,E*)-Benzyl 2-(ethyl(4-methoxyphenyl)amino)-2,5-diphenylpent-4-enoate (3q)**

Following the general procedure B, 3.0 M EtMgBr (193  $\mu$ L, 0.579 mmol) was added to **11** (100 mg, 0.290 mmol) in THF (2.5 mL), allowed to react for 45 min and subjected to a solution of  $[\eta^3\text{-C}_3\text{H}_5\text{PdCl}]_2$  (3.30 mg, 0.009 mmol), *R*-BINAP (11.6 mg, 0.019 mmol) and cinnamyl acetate (56 mg, 0.318 mmol) in THF (2.0 mL) for 45 min. After work-up, concentration and column chromatography (eluent 7% EtOAc/hexanes) product **3q** (139 mg) was obtained in 76% yield as a yellow oil:  $^1\text{H}$  NMR (500 MHz,  $\text{CDCl}_3$ )  $\delta$  7.47 (d,  $J$  = 8.2 Hz, 2H), 7.40 (dd,  $J$  = 7.5, 4.3 Hz, 2H), 7.37-7.31 (m, 5H), 7.28-7.26 (m, 1H), 7.19 (t,  $J$  = 7.3 Hz, 2H), 7.14-7.10 (m, 1H), 7.05 (d,  $J$  = 8.8 Hz, 2H), 7.00 (d,  $J$  = 7.5 Hz, 2H), 6.77 (d,  $J$  = 8.9 Hz, 2H), 5.83 (d,  $J$  = 15.9 Hz, 1H), 5.68 (dt,  $J$  = 15.9, 7.2 Hz, 1H), 5.34 (d,  $J$  = 12.1 Hz, 1H), 5.29 (d,  $J$  = 12.1 Hz, 1H), 3.80 (s, 3H), 3.08-3.01 (m, 1H), 2.97-2.91 (m, 1H), 2.62 (dd,  $J$  = 13.8, 7.2 Hz, 1H), 2.41 (dd,  $J$  = 13.5, 7.2 Hz, 1H), 0.79 (t,  $J$  = 7.0 Hz, 3H);  $^{13}\text{C}$  NMR (125 MHz,  $\text{CDCl}_3$ )  $\delta$  172.5, 157.8, 141.7, 139.1, 138.0, 135.8, 133.0, 131.4, 129.1, 128.7, 128.5, 128.4, 127.9, 127.8, 127.3, 126.9, 126.1, 126.0, 113.8, 75.1, 66.7, 55.5, 46.7, 44.4, 14.7; chiral HPLC (OD, 97.5:2.5 hexanes:*i*-PrOH, 1.0 mL/min, 254 nm):  $t_R$  of **3q**: 5.8 min (major) and 9.5 min (minor).

**Notable Substrates that gave lower ee or no conversion following general procedure B:**

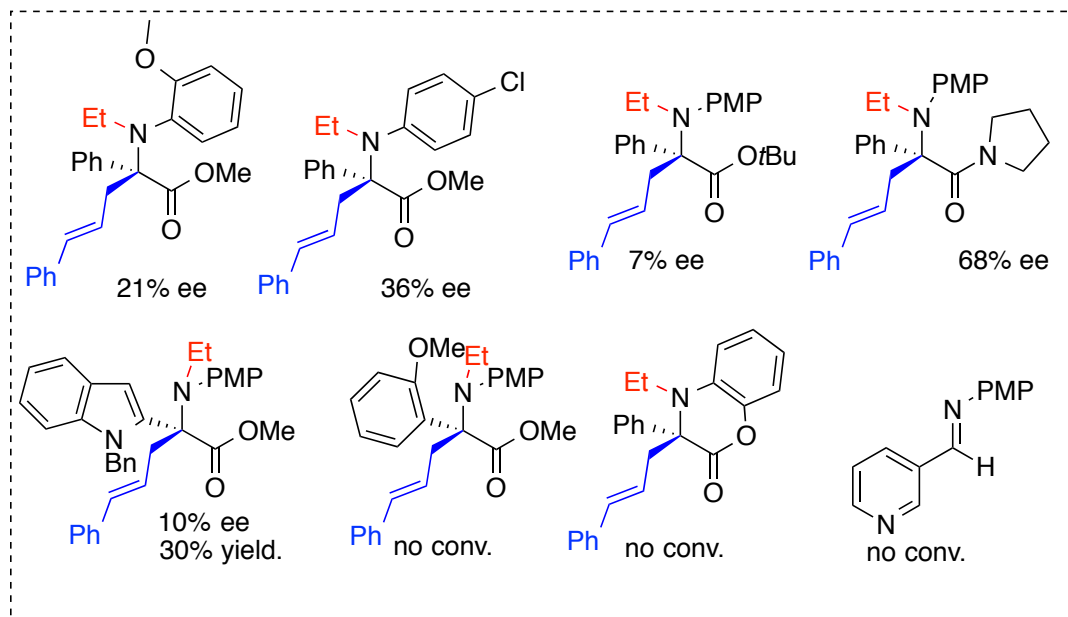



### Studies on Allylation of *N*-Alkylated Intermediate (Scheme 3)

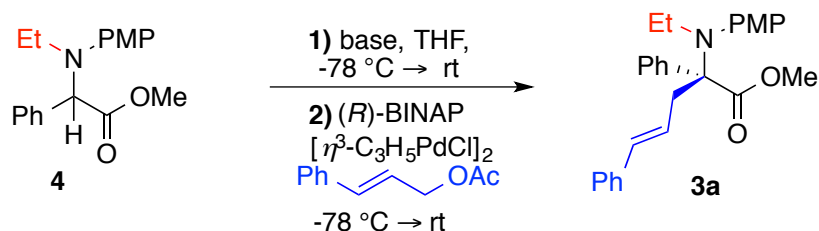

$\alpha$ -Amino ester **4** was dissolved in THF in a flame dried 10 mL round bottom flask charged with a stir bar and put under argon. The reaction mixture was cooled to  $-78\text{ }^\circ\text{C}$  and a solution of base in THF was added dropwise. The reaction mixture was warmed to ambient temperature and allowed to react for 10 min and then cooled to  $-78\text{ }^\circ\text{C}$ . A second 10 mL round bottom flask charged with a stir bar was flamed dried under argon, Pd/L/cinnamyl acetate was added, dissolved in THF and cooled to  $-78\text{ }^\circ\text{C}$ . The Pd/L/cinnamyl acetate slurry was added to the reaction mixture, which was allowed to warm to ambient temperature. The resultant reaction mixture was cooled to  $0\text{ }^\circ\text{C}$  after 45 minutes, quenched with satd  $\text{NH}_4\text{Cl}$  (10 mL) and extracted with EtOAc (3 x 15 mL). The combined organic layers were washed with brine, dried over  $\text{Na}_2\text{SO}_4$ , filtered and concentrated *in vacuo*. The resulting residue was purified by chromatography to afford pure  $\alpha$ -allyl- $\alpha$ -aryl  $\alpha$ -amino acid **3a**.

**Table S2:** Allylation of the *N*-Alkylation Product (Scheme 3).<sup>a</sup>

| Entry | Base   | Conversion (%) <sup>b</sup> | ee (%) <sup>c</sup> |
|-------|--------|-----------------------------|---------------------|
| 1     | EtMgBr | ~50                         | 34                  |
| 2     | NaH    | No Product                  | nd                  |
| 3     | NaHMDS | ~90                         | 19 <sup>d</sup>     |
| 4     | KHMDS  | ~85                         | 23 <sup>d</sup>     |
| 5     | LHMDS  | ~90                         | 18 <sup>d</sup>     |

<sup>a</sup>Reaction conditions: [**4**] = 0.19 M, 2.0 equiv base, THF (1.0 mL), rt for 10 min, then cool to  $-78\text{ }^\circ\text{C}$  and add solution of 2.5 mol%  $[\eta^3\text{-C}_3\text{H}_5\text{PdCl}]_2$ , 5.0 mol%  $(R)$ -BINAP, 1.0 equiv cinnamyl acetate in THF (1.0 mL) and warm to rt. <sup>b</sup>Determined By  $^1\text{H}$  NMR spectroscopy. <sup>c</sup>Determined by HPLC. <sup>d</sup>Opposite major enantiomer observed.

## The Effect of Additives:

**Table S3:** The Addition of Additives After Grignard Addition.<sup>a</sup>

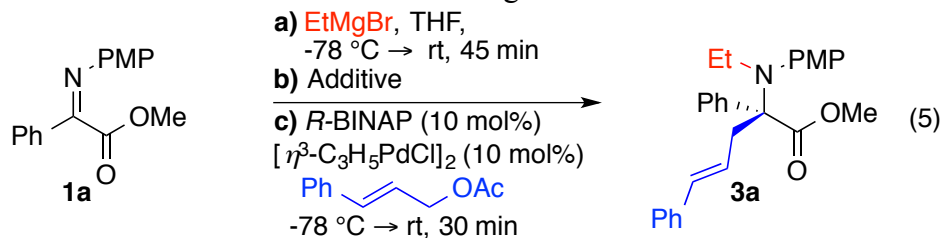

| Entry | Additive             | Conversion (%) <sup>b</sup> | ee (%) <sup>c</sup> |
|-------|----------------------|-----------------------------|---------------------|
| 1     | NPh <sub>3</sub>     | ~90                         | 79                  |
| 2     | NEt <sub>3</sub>     | ~90                         | 34                  |
| 3     | DIPA                 | ~90                         | 34                  |
| 4     | AgBr                 | ~90                         | 30                  |
| 5     | Ag <sub>2</sub> O    | ~90                         | 28                  |
| 6     | ZnCl <sub>2</sub>    | ~50                         | 4                   |
| 7     | Me <sub>3</sub> SnCl | ~80                         | 21                  |

<sup>a</sup>Reaction conditions: General procedure **B** (see below) was followed with the addition of 1-2 equiv of additive after step a. <sup>b</sup>Determined by <sup>1</sup>H NMR spectroscopy with respect to **1a**. <sup>c</sup>Determined by HPLC analysis.

Table 2 and 3 as well as Table S2 and S3 support the preferable formation of complex **B** in Figure 2. With respect to the aggregation state in Figure 2, selectivity was enhanced with ethereal solvents compared to toluene, DCM, etc., which should solvate Mg. This result indicates that **B** and **C** are more likely than **A**. Amine additives reduced selectivity. Since amine additives should break up aggregates, this result indicates **C** is unlikely leaving **B** the most likely candidate).

## Reduction of Tandem Product (Scheme 4)

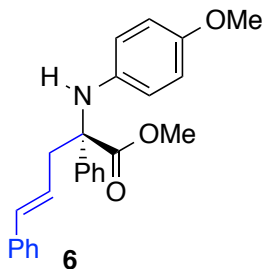

**(*S,E*)-Methyl 2-((4-methoxyphenyl)amino)-2,5-diphenylpent-4-enoate (6).** Following the modified procedure previously reported by the Grotjahn group for alkene isomerization<sup>6</sup>: An nmr tube equipped with a J Young valve that was kept in an 120 °C oven overnight was brought into the glovebox. **3m** (40 mg, 0.09 mmol, 70% ee) was added to the tube via a d<sup>6</sup>-acetone solution (0.3M). The Grotjahn catalyst<sup>7</sup> (**5**) (3 mg, 0.005 mmol) was added via a d<sup>6</sup>-acetone solution (0.02M). The nmr tube was sealed and brought out of the glovebox and put under argon via a three-way adapter allowing for

addition of a TFA/D<sub>2</sub>O solution in d<sup>6</sup>-acetone (0.01 mmol of TFA, 0.51 mmol of D<sub>2</sub>O in 100 μL d<sup>6</sup>-acetone, sparged after preparation). The nmr Tube was sealed, removed from argon and put in a 70 °C oil bath. The reaction was monitored by <sup>1</sup>H NMR every 4-5 h. After 24 h no more product was formed, the reaction was transferred with EtOAc, concentrated, passed through Celite with EtOAc and concentrated *in vacuo*. The resultant residue was subjected to chromatography (7% EtOAc in Hexanes) affording **6** (26 mg) in 74% yield: <sup>1</sup>H NMR (500 MHz, CDCl<sub>3</sub>) δ 7.65 (d, *J* = 8.0 Hz, 2H), 7.39 (t, *J* = 7.5 Hz, 2H), 7.34-7.20 (m, 6H), 6.65 (d, *J* = 9 Hz, 2H), 6.38 (d, *J* = 9 Hz, 2H), 6.32 (d, *J* = 15.9 Hz, 1H), 6.02 (dt, *J* = 15.8, 7.2 Hz, 1H), 5.00 (b, 1H), 3.70 (s, 3H), 3.69 (s, 3H), 3.36 (d, *J* = 7.4 Hz, 2H); <sup>13</sup>C NMR (125 MHz, CDCl<sub>3</sub>) δ 174.0, 152.5, 140.9, 138.5, 137.3, 134.3, 134.5, 128.8, 128.6, 127.8, 127.5, 127.2, 126.4, 123.9, 117.2, 114.6, 67.2, 55.7, 53.1, 37.6; IR (film) 3403, 1733, 1513, 1447, 1239 cm<sup>-1</sup>; HRMS (ESI) calcd for C<sub>25</sub>H<sub>26</sub>NO<sub>3</sub> [M+H]<sup>+</sup> *m/z* = 388.1913; found 388.1911; [α]<sub>D</sub><sup>24</sup> = -61.0 (c 0.67, 70% ee, CH<sub>2</sub>Cl<sub>2</sub>);

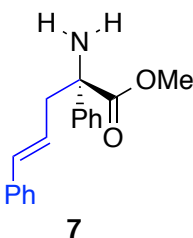

**(*S,E*)-Methyl 2-amino-2,5-diphenylpent-4-enoate (7)**. A solution of **6** (22 mg, 0.056 mmol) in MeCN (6.3 mL) was cooled to 0 °C. To this mixture was added a solution of ceric ammonium nitrate (94 mg, 0.17 mmol) in H<sub>2</sub>O (3.1 mL) under N<sub>2</sub>. The mixture was allowed to warm to ambient temperature; it went from yellow to blue then purple at rt. The reaction was stirred for 30 min at rt then cooled to 0 °C and quenched with 10% NaHCO<sub>3</sub> until a pH of 7 was obtained (~1.0 mL). The mixture was diluted with 20% Na<sub>2</sub>SO<sub>3</sub> (10 mL) and extracted with EtOAc (3 x 15 mL). The combined organic phases were washed with brine (2x), dried over Na<sub>2</sub>SO<sub>4</sub>, and concentrated *in vacuo*. The resulting residue was purified by chromatography (pre-washed SiO<sub>2</sub> with 3% NEt<sub>3</sub> in Hexanes, eluent 40% EtOAc in Hexanes) providing product **7** (8.7 mg) in 55% yield. <sup>1</sup>H NMR (500 MHz, CDCl<sub>3</sub>) δ 7.56 (d, *J* = 8 Hz, 2H), 7.38 (t, *J* = 7.6 Hz, 2H), 7.33-7.27 (m, 5H), 7.24-7.20 (m, 1H), 6.54 (d, *J* = 15.9 Hz), 6.12-6.06 (m, 1H), 3.75 (s, 3H), 3.14 (dd, *J* = 13.6, 6.8 Hz, 1H), 2.79 (dd, *J* = 13.8, 8.1 Hz, 1H), 2.00 (b, 2H); <sup>13</sup>C NMR (125 MHz, CDCl<sub>3</sub>) δ 175.8, 142.9, 137.1, 135.1, 128.7, 128.7, 127.8, 127.6, 126.4, 125.5, 124.4, 63.8, 52.8, 44.2; IR (film) 3387, 3323, 3026, 2951, 1731, 1447, 1435, 1214 cm<sup>-1</sup>; HRMS (ESI) calcd for C<sub>18</sub>H<sub>20</sub>NO<sub>2</sub> [M+H]<sup>+</sup> *m/z* = 282.1494; found 282.1493; [α]<sub>D</sub><sup>25</sup> = -31.3 (c 0.44, 70% ee, CH<sub>2</sub>Cl<sub>2</sub>);

### Synthesis of Higher Ring Order Proline Analog (Scheme 5)

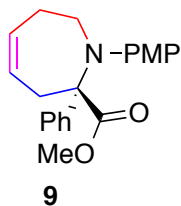

**(S)-methyl 1-(N-(4-methoxyphenyl))-2-phenyl-3,6,7-hexahydro-1H-azepine-2-carboxylate (9).** A 8 mL microwave vial equipped with stir bar was flamed dried under vacuum. The flask was sealed with a septa, put under argon, and catalyst **8** (2.82 mg, 0.003 mmol) and **3m** (29 mg, 0.066 mmol, 81% ee) in toluene (6 mL) were added. The septa was replaced with a microwave cap and the vial was subjected to  $\mu$ W (100 W, 100 psi, 115 °C) conditions for 1 h. The mixture was allowed to cool to ambient temperature and ethyl vinyl ether (75  $\mu$ L, 0.784 mmol) was added and allowed to stir for 30 min, to quench catalyst **8**. Upon completion, the mixture was passed through SiO<sub>2</sub> with 30% EtOAc in hexanes, concentrated *in vacuo* and chromatographed (pre-wash SiO<sub>2</sub> with 5% NEt<sub>3</sub> in hexanes, eluent 5% EtOAc in hexanes) to provide **9** (23 mg) in >98% yield as a light yellow oil: <sup>1</sup>H NMR (500 MHz, CDCl<sub>3</sub>)  $\delta$  7.56 (d, *J* = 7.6 Hz, 2H), 7.27-7.24 (m, 2H), 7.21-7.18 (m, 1H), 6.63-6.61 (m, 2H), 6.56-6.54 (m, 2H), 5.72-5.68 (m, 1H), 5.41-5.37 (m, 1H), 4.11-4.05 (m, 1H), 3.90-3.85 (m, 1H), 3.68 (s, 3H), 3.63 (s, 3H), 3.23 (dd, *J* = 15.8, 6.2 Hz, 1H), 2.88 (dd, *J* = 16.0, 6.7 Hz, 1H), 2.67-2.55 (m, 2H); <sup>13</sup>C NMR (125 MHz, CDCl<sub>3</sub>)  $\delta$  175.2, 152.0, 143.6, 141.3, 131.4, 128.2, 127.8, 126.9, 123.3, 118.0, 113.8, 74.6, 55.6, 52.3, 47.8, 40.6, 32.9; IR (film) 2949, 1729, 1512, 1246, 1037 cm<sup>-1</sup>; HRMS (ESI) calcd for C<sub>21</sub>H<sub>24</sub>NO<sub>3</sub> [M+H]<sup>+</sup> *m/z* = 338.1756; found 338.1755; [ $\alpha$ ]<sub>D</sub><sup>25</sup> = +37.9 (c 0.25, 81% ee, CH<sub>2</sub>Cl<sub>2</sub>).

#### Synthesis of *N*-alkyl $\alpha$ -phenyl $\alpha$ -amino acids

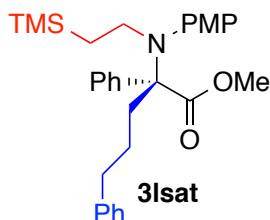

**(S)-methyl 2-((4-methoxyphenyl)(2-(trimethylsilyl)ethyl)amino)-2,5-diphenylpentanoate (3l<sub>sat</sub>).** A 10 mL round bottom flask was charged with a stir bar and flame dried under vacuum. To the reaction flask was added **3l** (50 mg, 0.113 mmol), EtOAc (3.4 mL) and 10% Pd/C (2.4 mg, 0.023 mmol). At ambient temperature the flask was purged with one hydrogen balloon and then subjected to a hydrogen atmosphere with a new hydrogen balloon for 45 min. The flask was opened to air, passed through SiO<sub>2</sub> with 30% EtOAc/Hexanes, concentrated *in vacuo* and chromatographed (5% EtOAc in Hexanes) providing **3l<sub>sat</sub>** (46 mg) in 92% yield as an oil: <sup>1</sup>H NMR (500 MHz, CDCl<sub>3</sub>)  $\delta$  7.40 (d, *J* = 7.4 Hz, 2H), 7.32 (t, *J* = 7.6 Hz, 2H), 7.28-7.23 (m, 1H), 7.17 (t, *J* = 7.4 Hz, 2H), 7.11 (d, *J* = 7.3 Hz, 1H), 7.07 (d, *J* = 8.9 Hz, 2H), 6.92 (d, *J* = 7.1 Hz, 2H), 6.85 (d, *J* = 8.9 Hz, 2H), 3.83 (s, 3H), 3.83 (s, 3H), 2.94 (dt, *J* = 12.6, 5.4 Hz, 1H), 2.85 (dt, *J* = 12.5, 5.8 Hz, 1H), 2.31-2.23 (m, 1H), 2.21-2.13 (m, 1H), 1.74 (dt, *J* = 12.4, 4.8 Hz, 1H), 1.59 (dt, *J* = 12.2, 4.6 Hz, 1H), 1.29-1.18 (m, 2H), 0.54-0.41 (m, 2H), 0.21 (s, 9H); <sup>13</sup>C NMR (125 MHz, CDCl<sub>3</sub>)  $\delta$  173.7, 157.7, 142.6, 141.7, 139.4, 131.1, 128.4, 128.2, 127.8, 127.8, 127.1, 125.6, 113.7, 74.8, 55.5, 51.3, 47.7, 40.1, 36.3, 26.7, 17.9, -1.6; IR (film) 2951, 2925, 1725, 1507, 1246 cm<sup>-1</sup>; HRMS (ESI) calcd for C<sub>30</sub>H<sub>40</sub>NO<sub>3</sub>Si [M+H]<sup>+</sup> *m/z* = 490.2777; found 490.2777; [ $\alpha$ ]<sub>D</sub><sup>25</sup> = +103.2 (c 0.25, 82% ee, CH<sub>2</sub>Cl<sub>2</sub>).

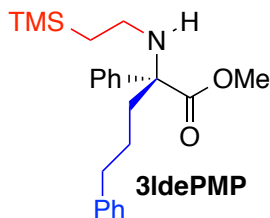

**(S)-methyl 2,5-diphenyl-2-((2-(trimethylsilyl)ethyl)amino)pentanoate (3IdePMP).** A solution of **3I<sub>sat</sub>** (23 mg, 0.047 mmol) in MeCN (949  $\mu$ L) was cooled to 0  $^{\circ}$ C. To this mixture was added a solution of ceric ammonium nitrate (78 mg, 0.141 mmol) in H<sub>2</sub>O (475  $\mu$ L). The mixture went from yellow to purple initially and then brown upon addition. After stirring for 60 min, the mixture was quenched with 5% NaHCO<sub>3</sub> until a pH of 9 was obtained (~2 mL). The mixture was diluted with 20% Na<sub>2</sub>SO<sub>3</sub> (20 mL) and extracted with EtOAc (3 x 25 mL). The combined organic phases were washed with brine (2 x 20 mL), dried over Na<sub>2</sub>SO<sub>4</sub>, and concentrated *in vacuo*. The resulting residue was chromatographed (15% EtOAc/Hexanes). The fractions that stained with KMnO<sub>4</sub> R<sub>f</sub> = 0.3 in 20% EtOAc in Hexanes were concentrated to afford product **3IdePMP** (12.5 mg) in 69% yield as an oil: <sup>1</sup>H NMR (500 MHz, CDCl<sub>3</sub>)  $\delta$  7.40 (d, *J* = 7.6 Hz, 2H), 7.31 (t, *J* = 7.4 Hz, 2H), 7.28-7.20 (m, 3H), 7.15 (t, *J* = 7.4 Hz, 1H), 7.10 (d, *J* = 7.2 Hz, 2H), 3.66 (s, 3H), 2.55 (t, *J* = 7.6, 2H), 2.41-2.25 (m, 2H), 2.13 (dt, *J* = 13.3, 4.5 Hz 1H), 2.00 (dt, *J* = 13.3, 4.5 Hz 1H), 1.72 (b, 1H), 1.59-1.47 (m, 1H), 1.45-1.33 (m, 1H), 0.83-0.68 (m, 2H), -0.013 (s, 9H); <sup>13</sup>C NMR (125 MHz, CDCl<sub>3</sub>)  $\delta$  176.0, 142.3, 142.1, 128.5, 128.4, 128.3, 127.4, 126.2, 125.8, 68.6, 52.2, 39.3, 36.0, 34.7, 24.9, 18.8, -1.2; IR (film) 3332, 2951, 1733, 1248 cm<sup>-1</sup>; HRMS (ESI) calcd for C<sub>22</sub>H<sub>34</sub>NO<sub>2</sub>Si [M+H]<sup>+</sup> *m/z* = 384.2359; found 384.2363; [ $\alpha$ ]<sub>D</sub><sup>25</sup> = -6.2 (c 0.13, 82% ee, CH<sub>2</sub>Cl<sub>2</sub>).

#### References:

- 1: Shang, G.; Yang, Q.; Zhang, X. *Angew. Chem. Int. Ed.* **2006**, *45*, 6360-6362.
- 2: Huang, H.; Wang, Y.; Chen, Z.; Hu, W. *Adv. Synth. Catal.* **2005**, *347*, 531-534.
- 3: Kang, Q.; Zhao, Z.; You, S. *Adv. Synth. Catal.* **2007**, *349*, 1657-1660.
- 4: Wilson, S.R.; Shedrinsky, A. *J. Org. Chem.* **1982**, *47*, 1983-1984.
- 5: Sommer, L.H.; Bailey, D.L.; Goldberg, G.M.; Buck, C.E.; Bye, T.S.; Evans, F.J.; Whitmore, F.C. *J. Am. Chem. Soc.* **1954**, *76*, 1613-1618.
- 6: (a) Erdogan, G.; Grotjahn, D.B. *J. Am. Chem. Soc.* **2009**, *131*, 10354-10355. (b) Larsen, C.R.; Grotjahn, D.B. *J. Am. Chem. Soc.* **2012**, *134*, 10357-10360.
- 7: The Grotjahn Catalyst, CAS: 930601-66-4, is available from Strem Chemicals, Inc., but was generously provided by the Grotjahn group.

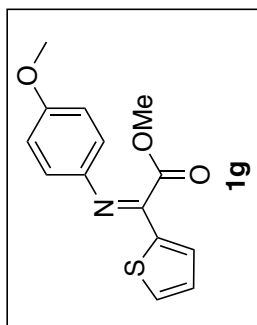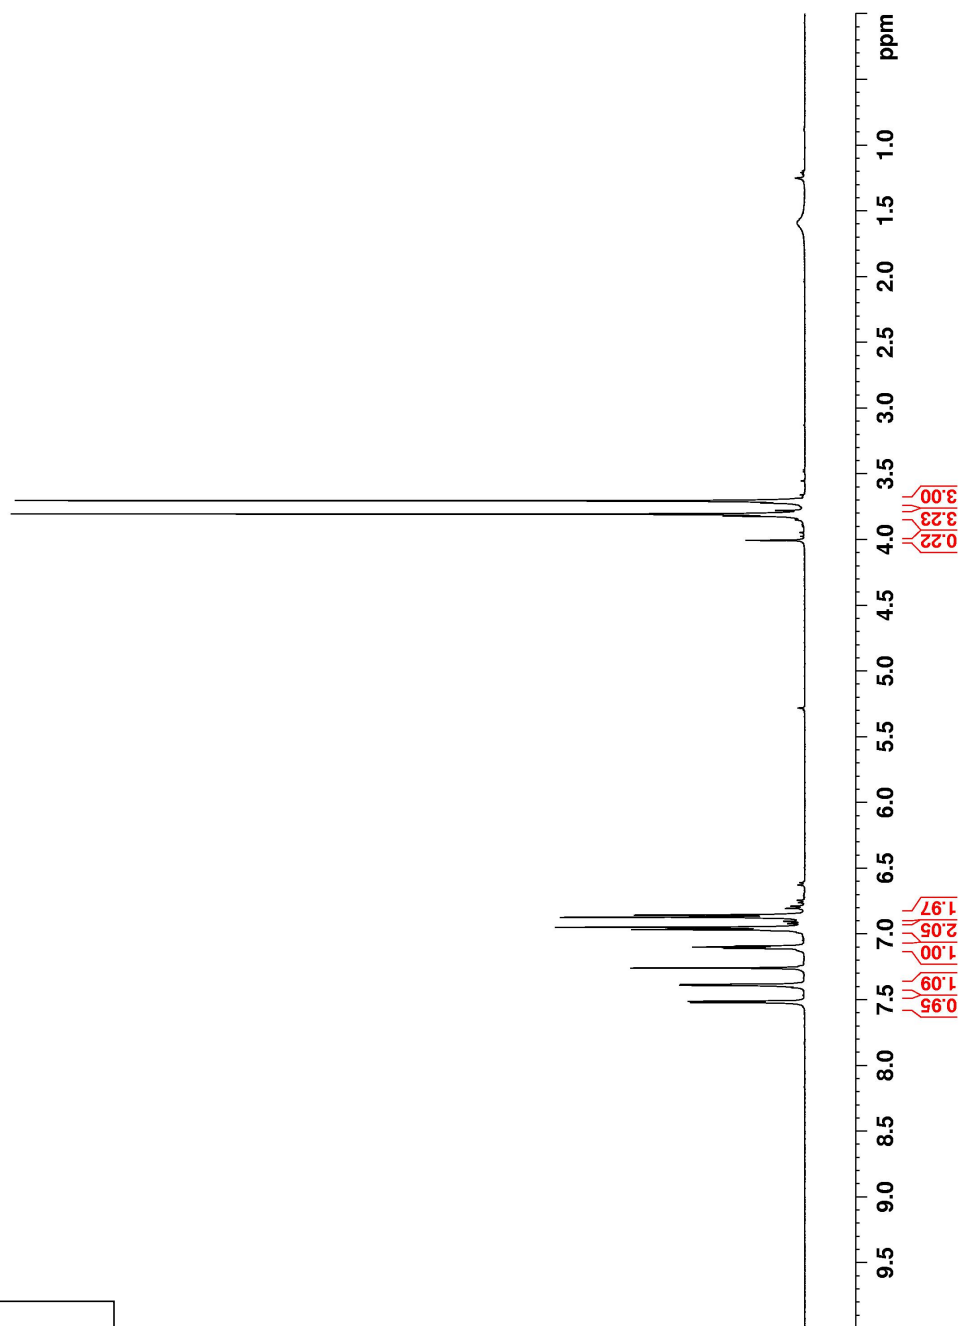

**Table 2.** 500 MHz <sup>1</sup>H NMR Spectrum of Compound **1g** in CDCl<sub>3</sub>

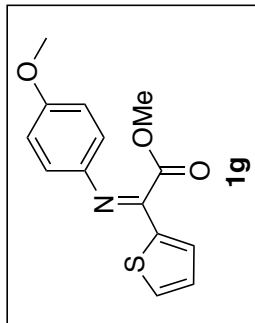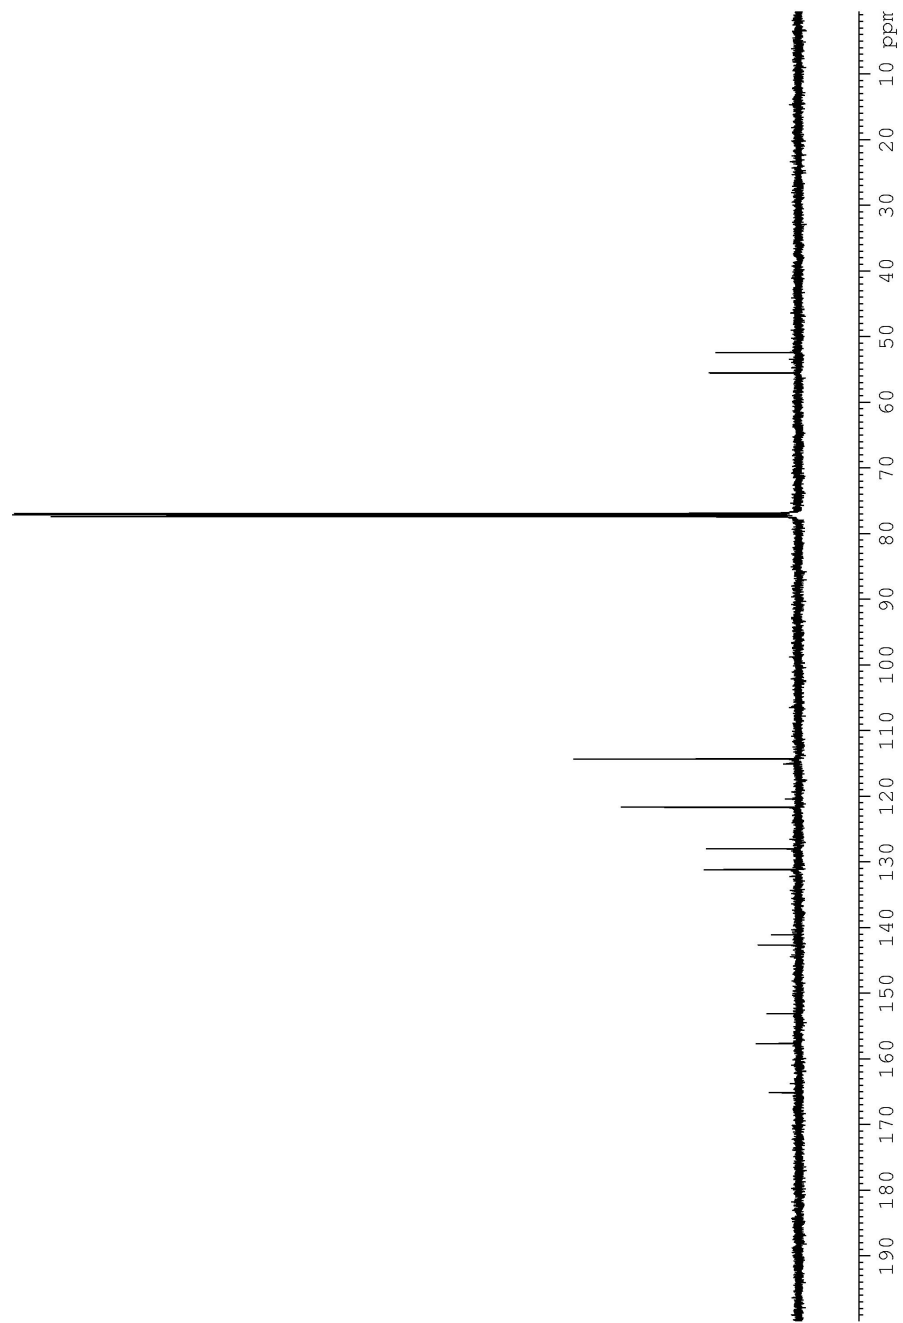

**Table 2** 125 MHz  $^{13}\text{C}$  NMR Spectrum of Compound **1g** in  $\text{CDCl}_3$

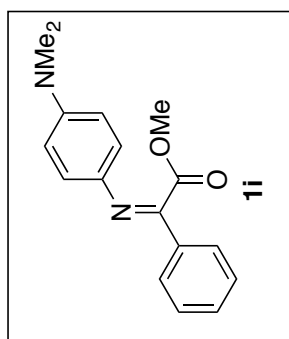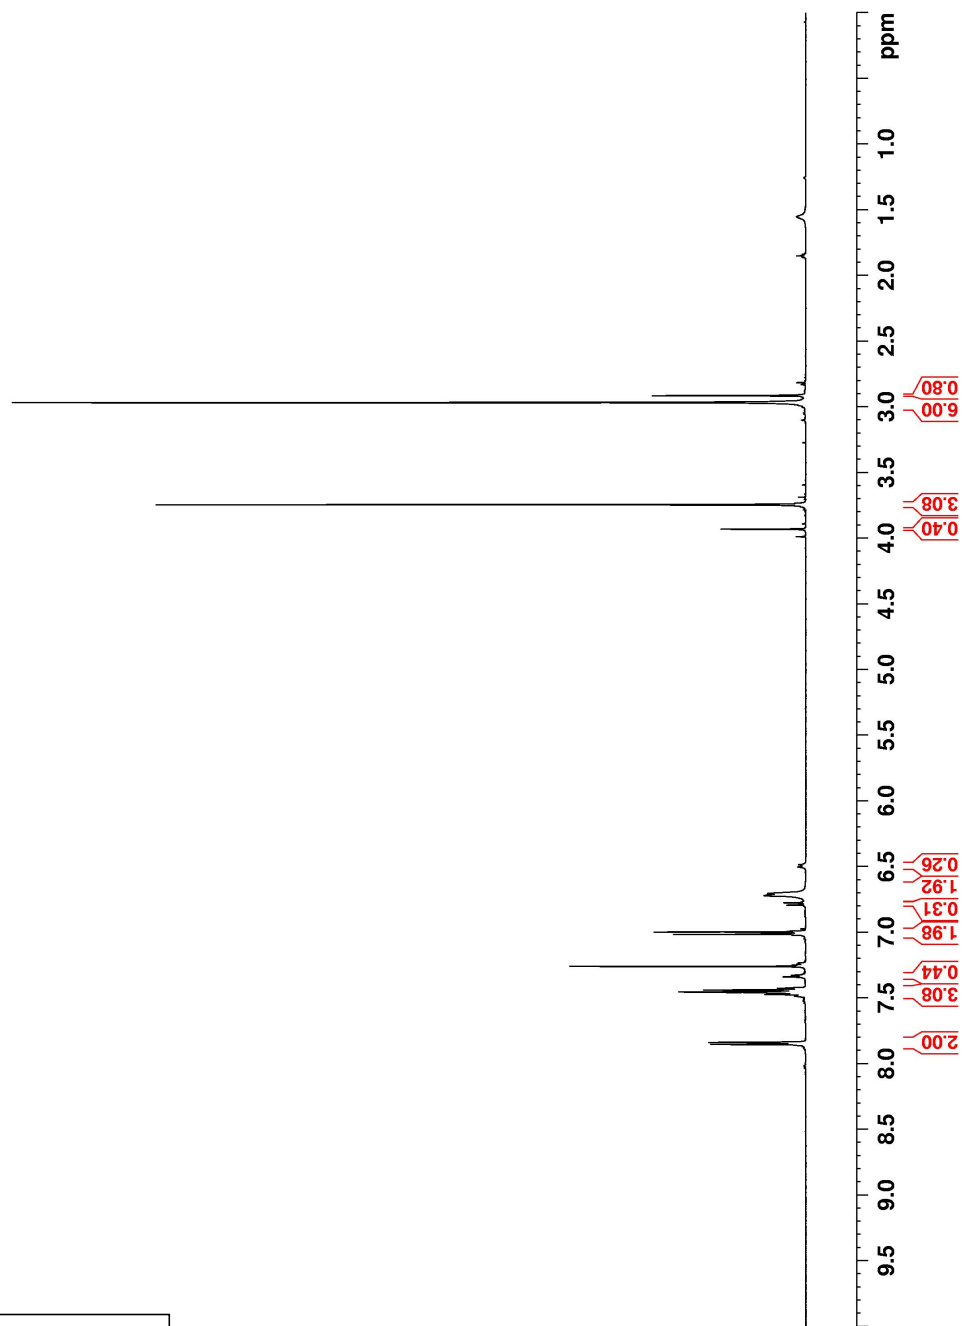

**Table 2.** 500 MHz <sup>1</sup>H NMR Spectrum of Compound **1i** in CDCl<sub>3</sub>



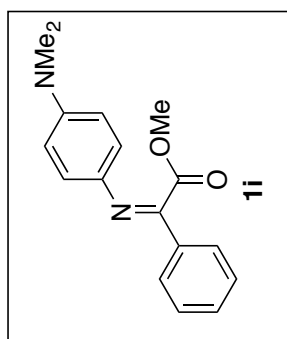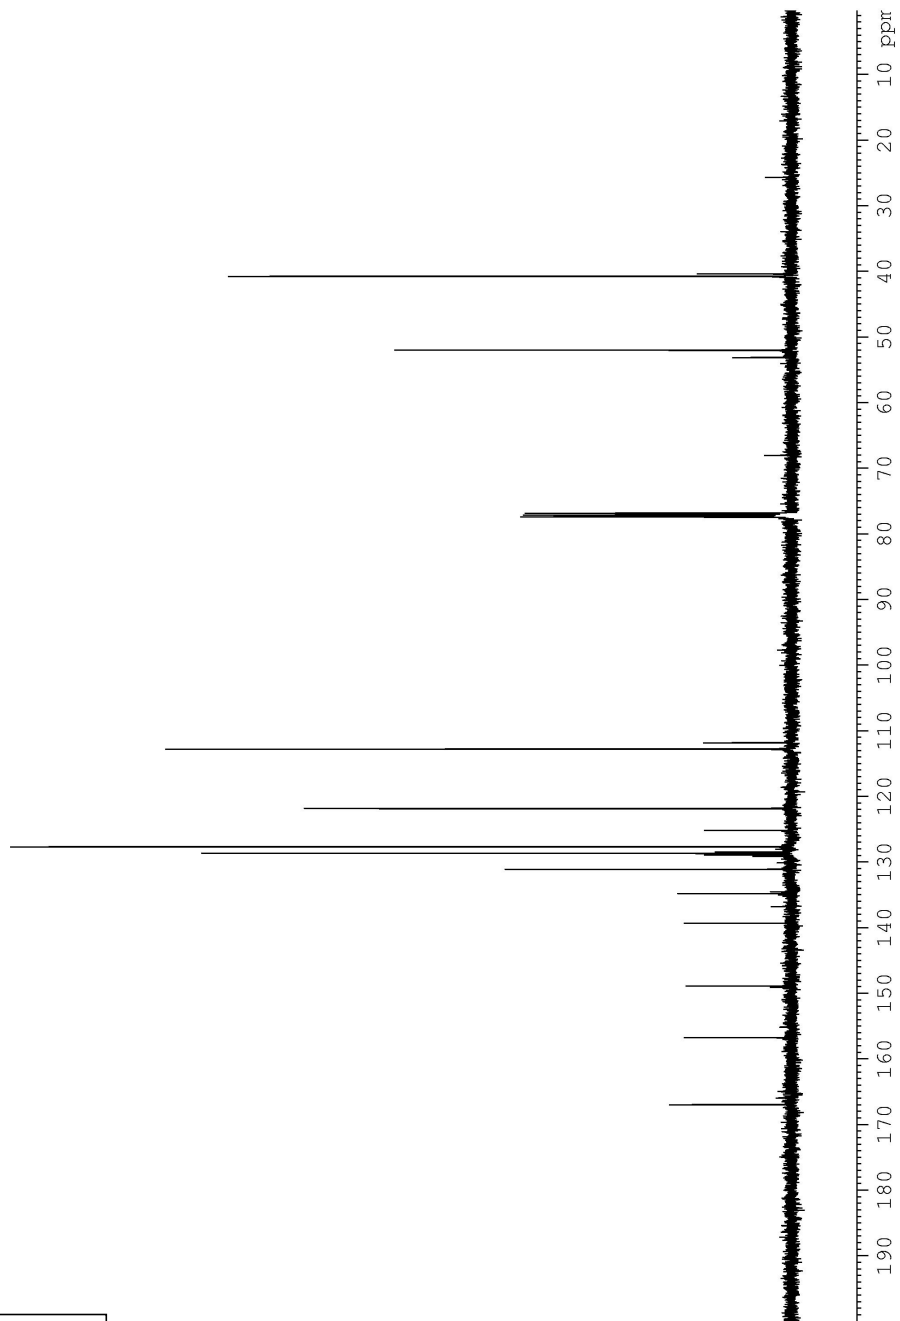

**Table 2.** 125 MHz <sup>13</sup>C NMR Spectrum of Compound **1i** in CDCl<sub>3</sub>

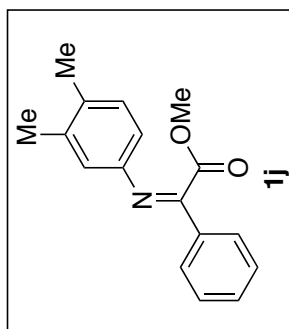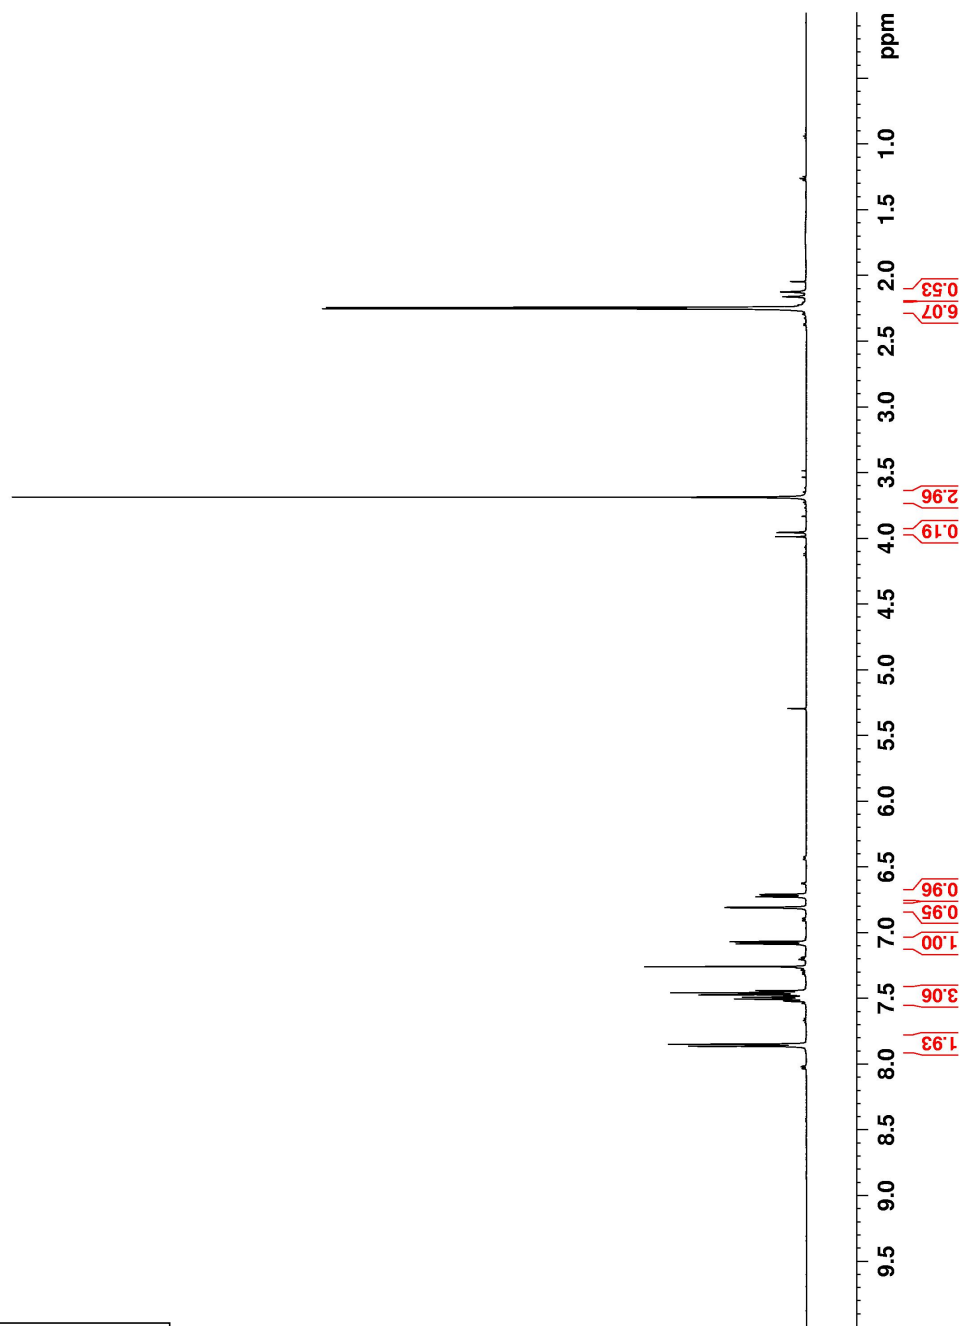

**Table 2.** 500 MHz <sup>1</sup>H NMR Spectrum of Compound **1j** in CDCl<sub>3</sub>

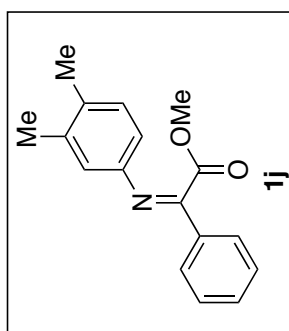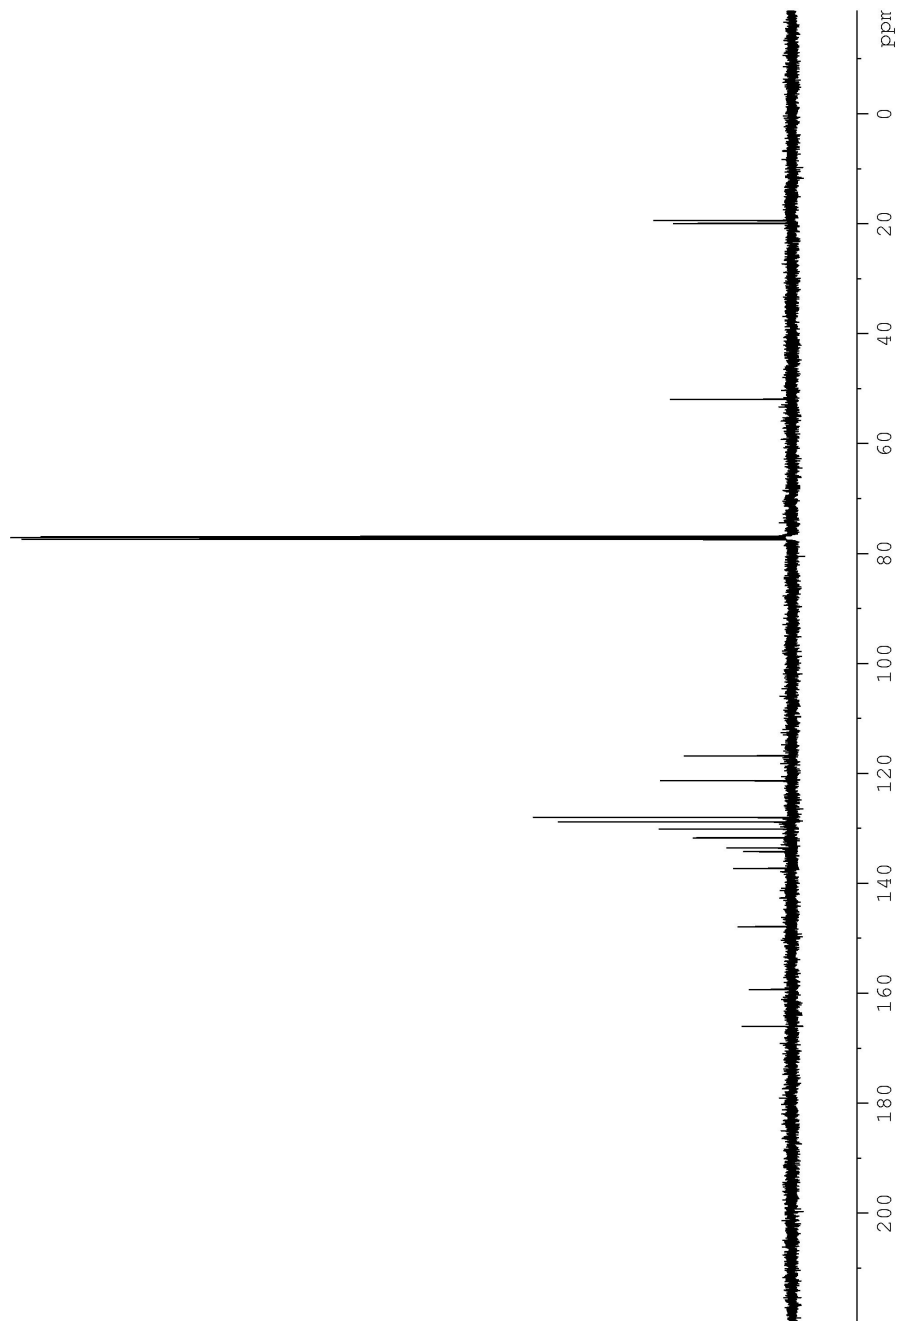

**Table 2.** 125 MHz <sup>13</sup>C NMR Spectrum of Compound **1j** in CDCl<sub>3</sub>

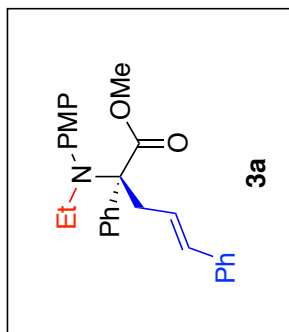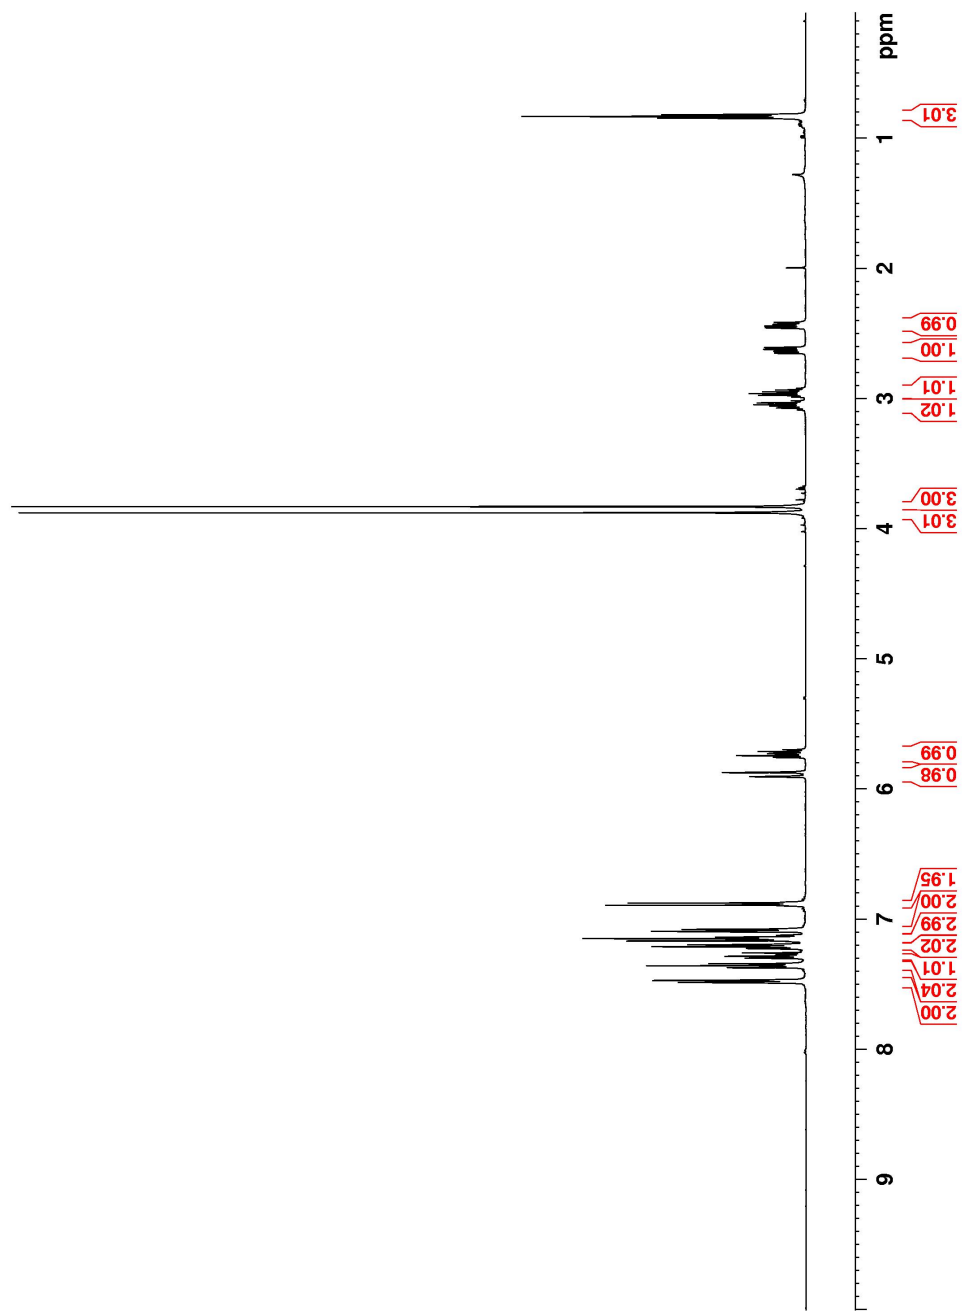

**Table 2.** 500 MHz <sup>1</sup>H NMR Spectrum of Compound **3a** in CDCl<sub>3</sub>

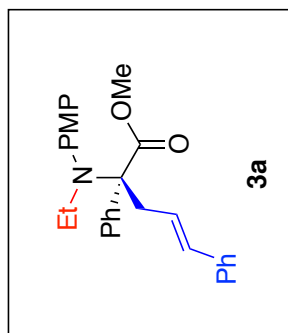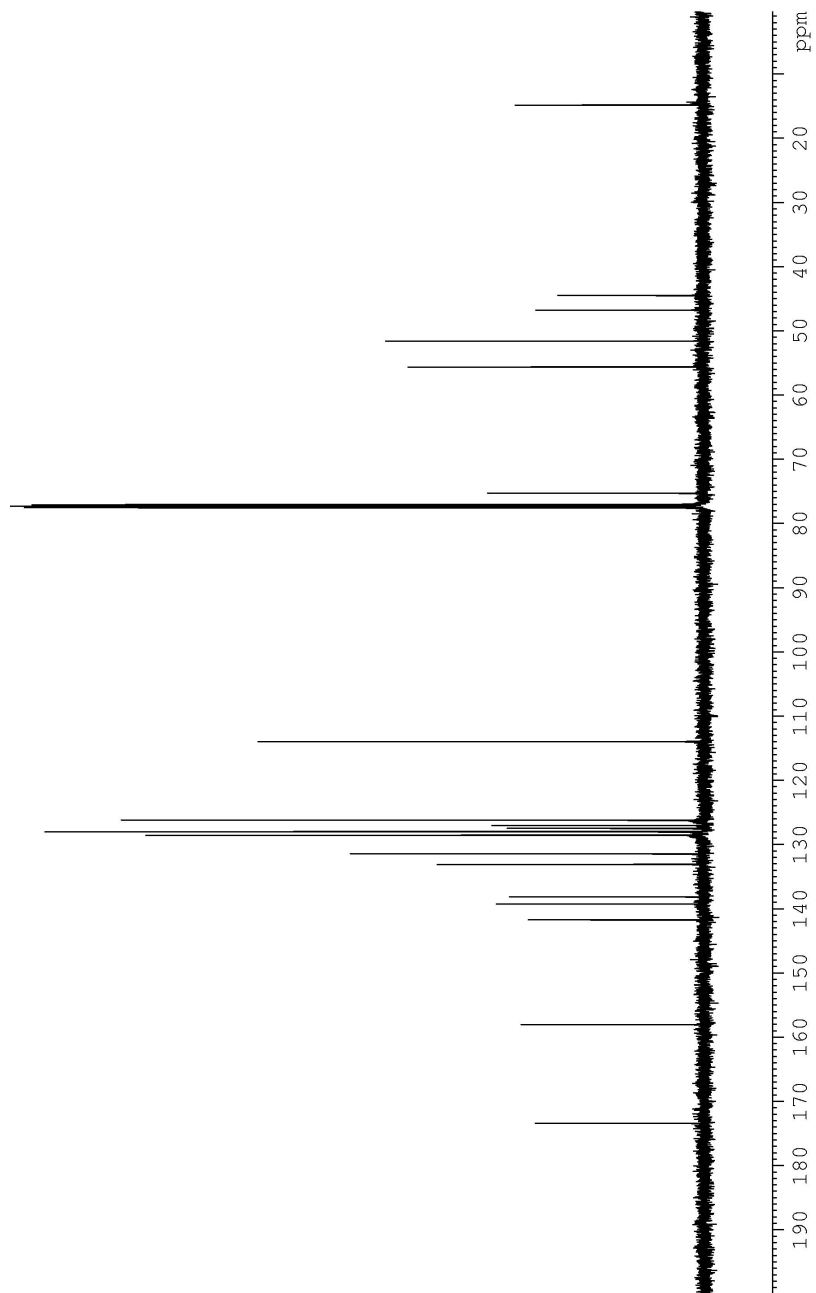

**Table 2.** 125 MHz <sup>13</sup>C NMR Spectrum of Compound **3a** in CDCl<sub>3</sub>

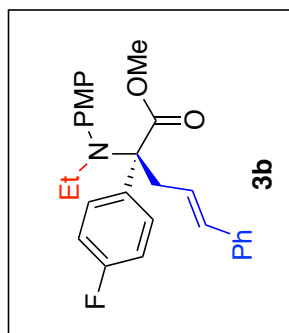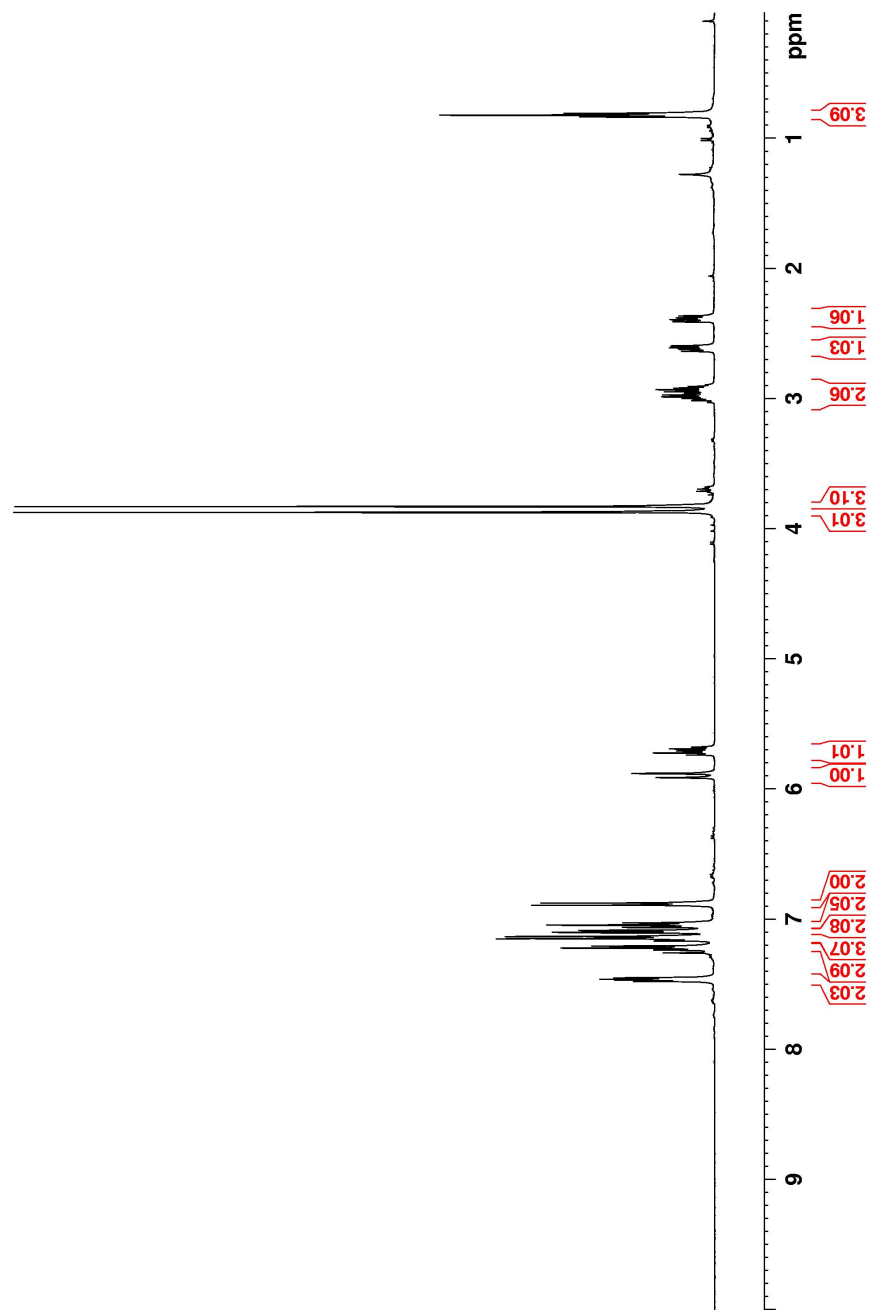

**Table 2** 500 MHz  $^1\text{H}$  NMR Spectrum of Compound **3b** in  $\text{CDCl}_3$

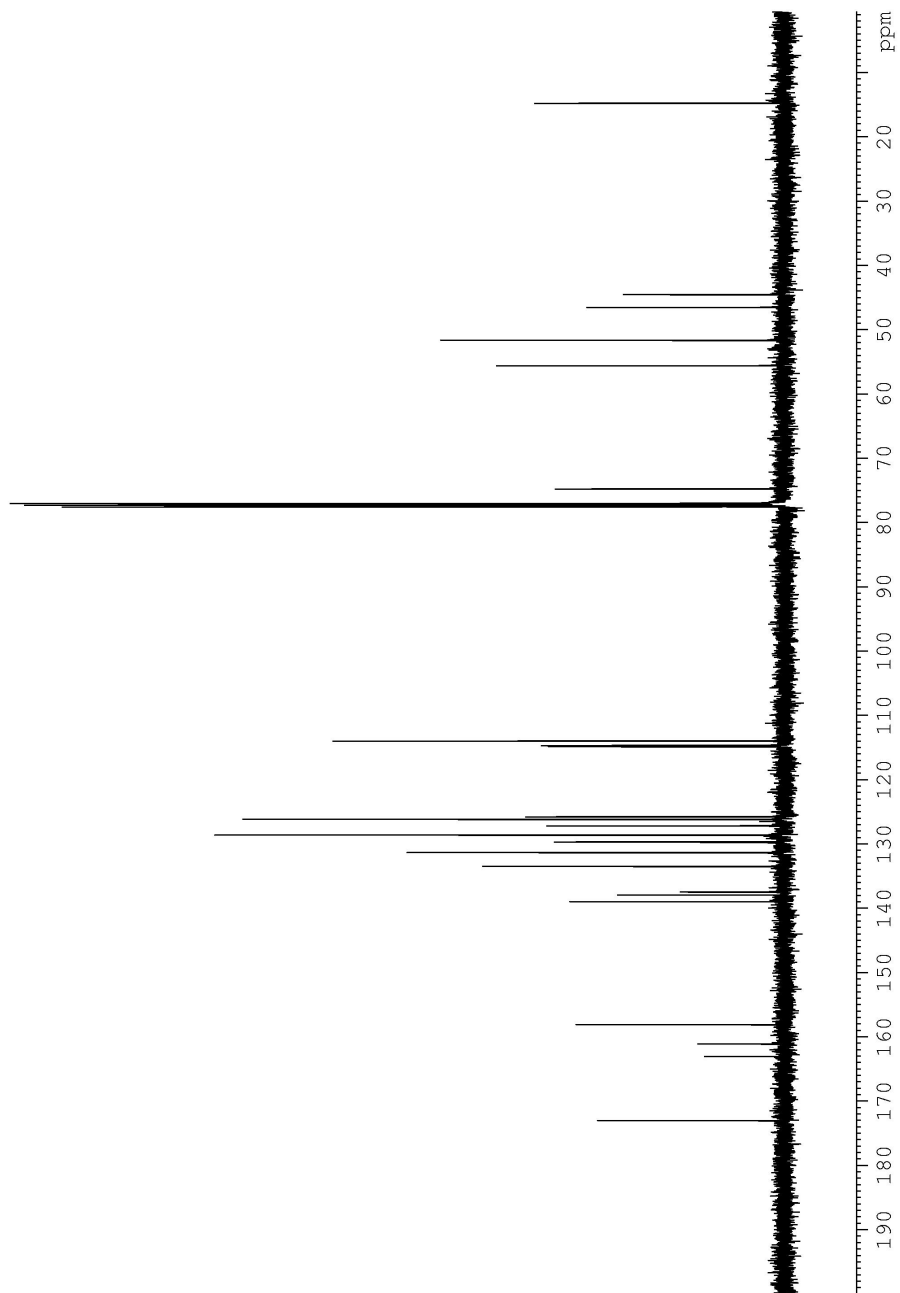

**Table 2.** 125 MHz  $^{13}\text{C}$  NMR Spectrum of Compound **3b** in  $\text{CDCl}_3$

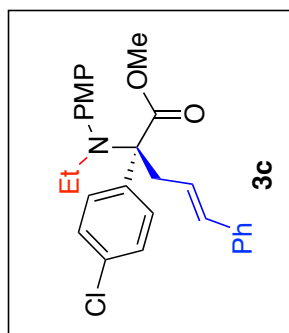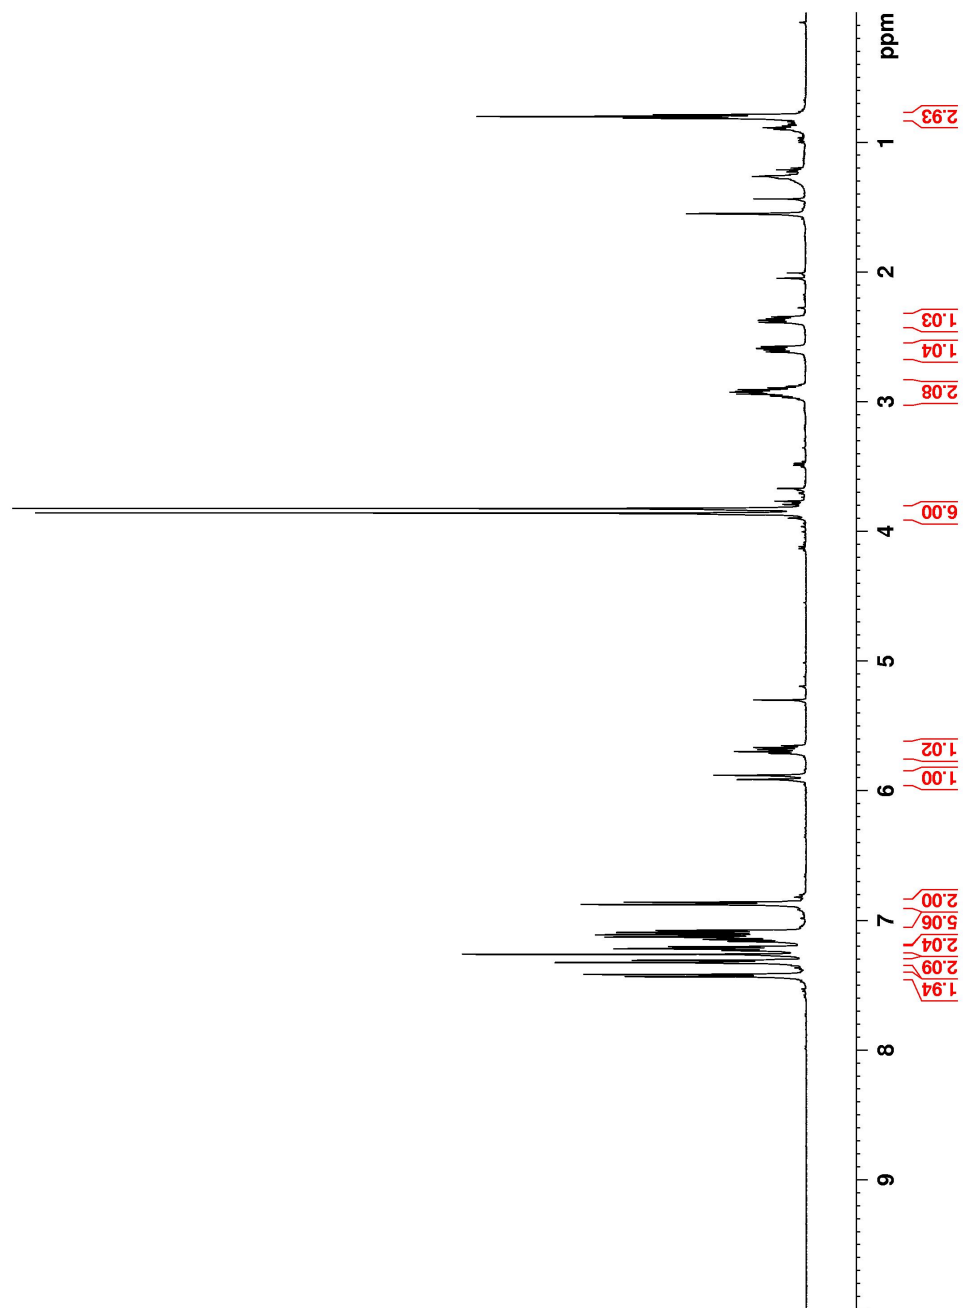

**Table 2.** 500 MHz <sup>1</sup>H NMR Spectrum of Compound **3c** in CDCl<sub>3</sub>



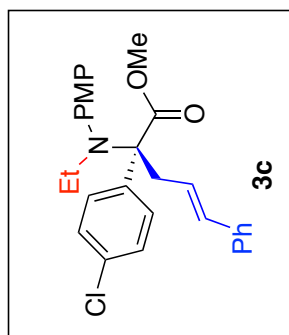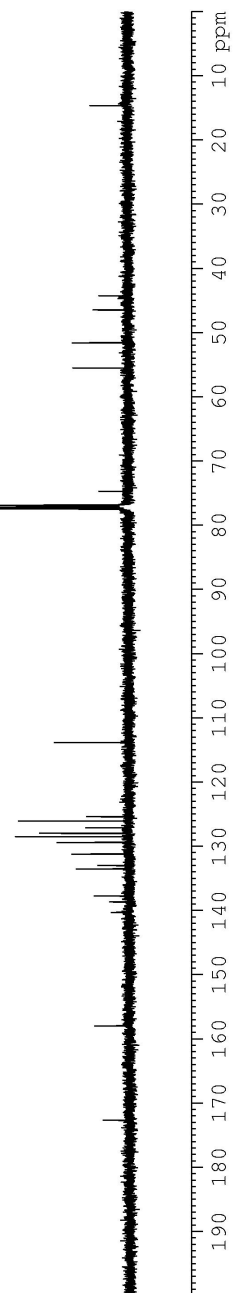

**Table 2.** 125 MHz  $^{13}\text{C}$  NMR Spectrum of Compound **3c** in  $\text{CDCl}_3$

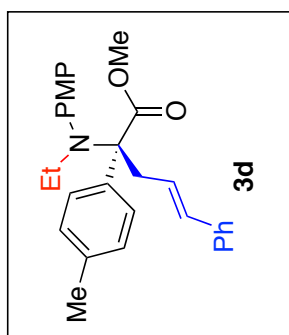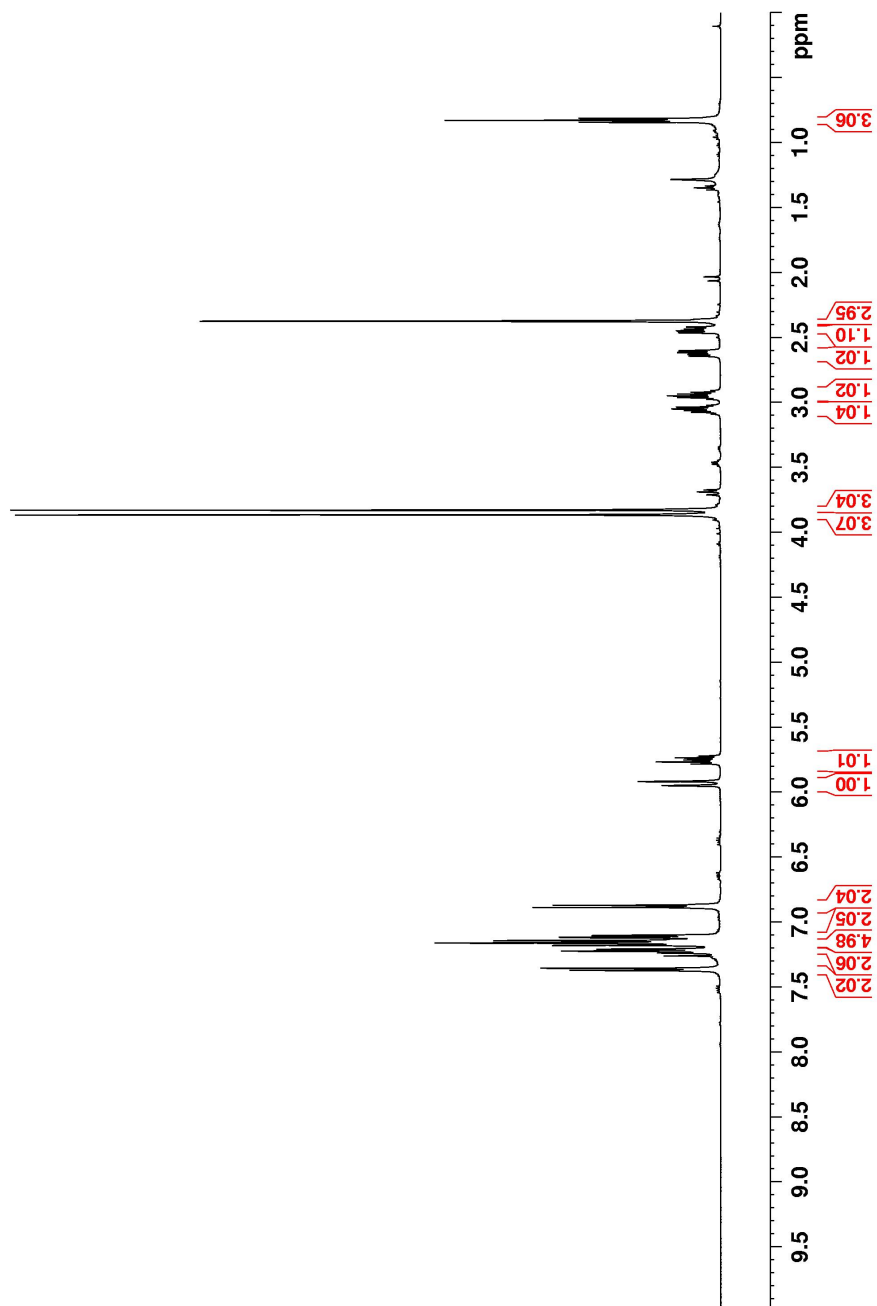

**Table 2.** 500 MHz <sup>1</sup>H NMR Spectrum of Compound **3d** in CDCl<sub>3</sub>

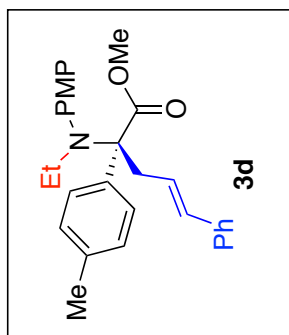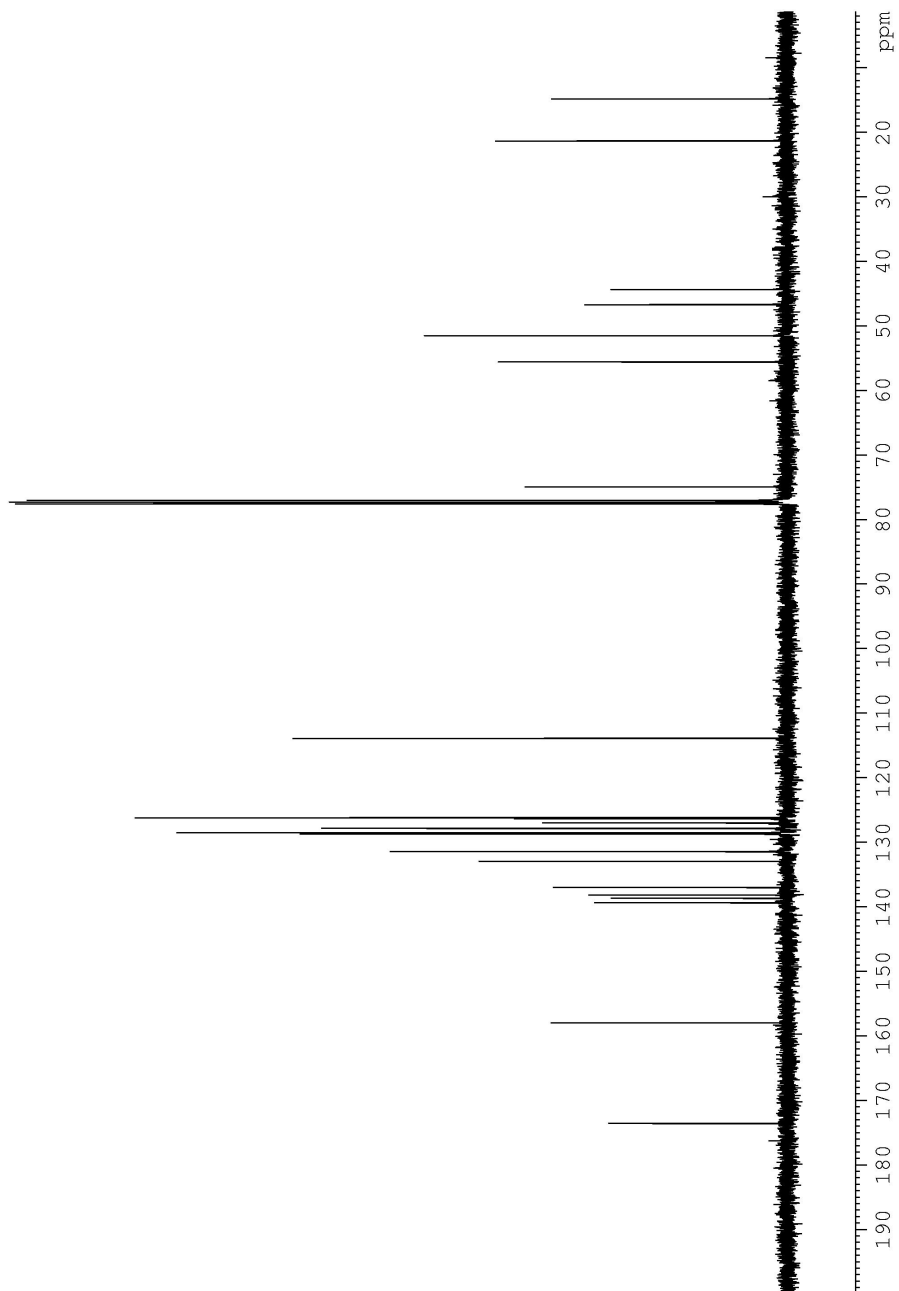

**Table 2.** 125 MHz  $^{13}\text{C}$  NMR Spectrum of Compound **3d** in  $\text{CDCl}_3$

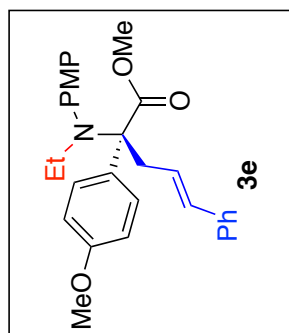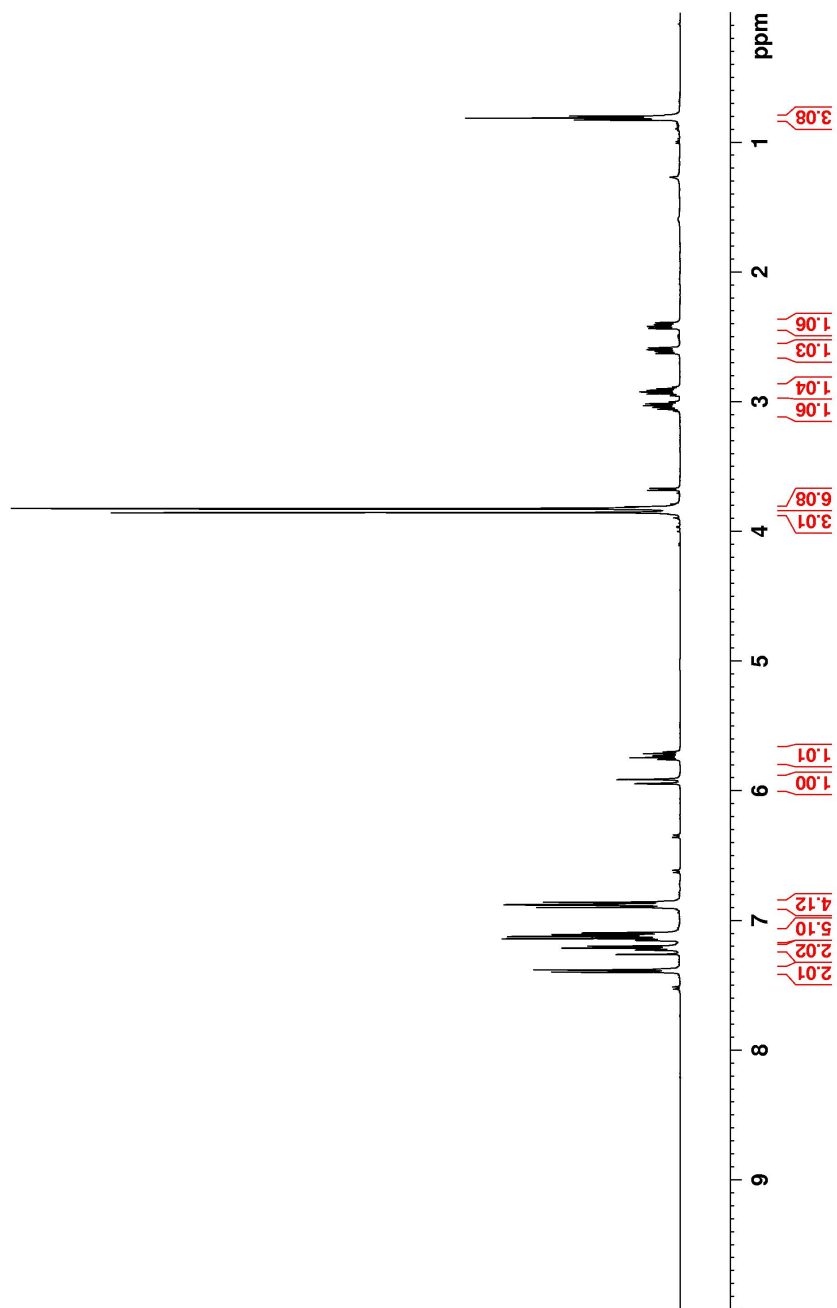

**Table 2.** 500 MHz <sup>1</sup>H NMR Spectrum of Compound **3e** in CDCl<sub>3</sub>

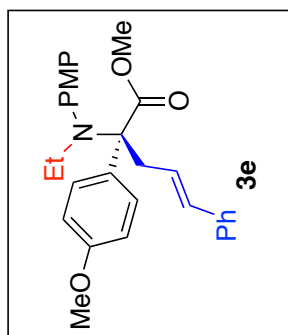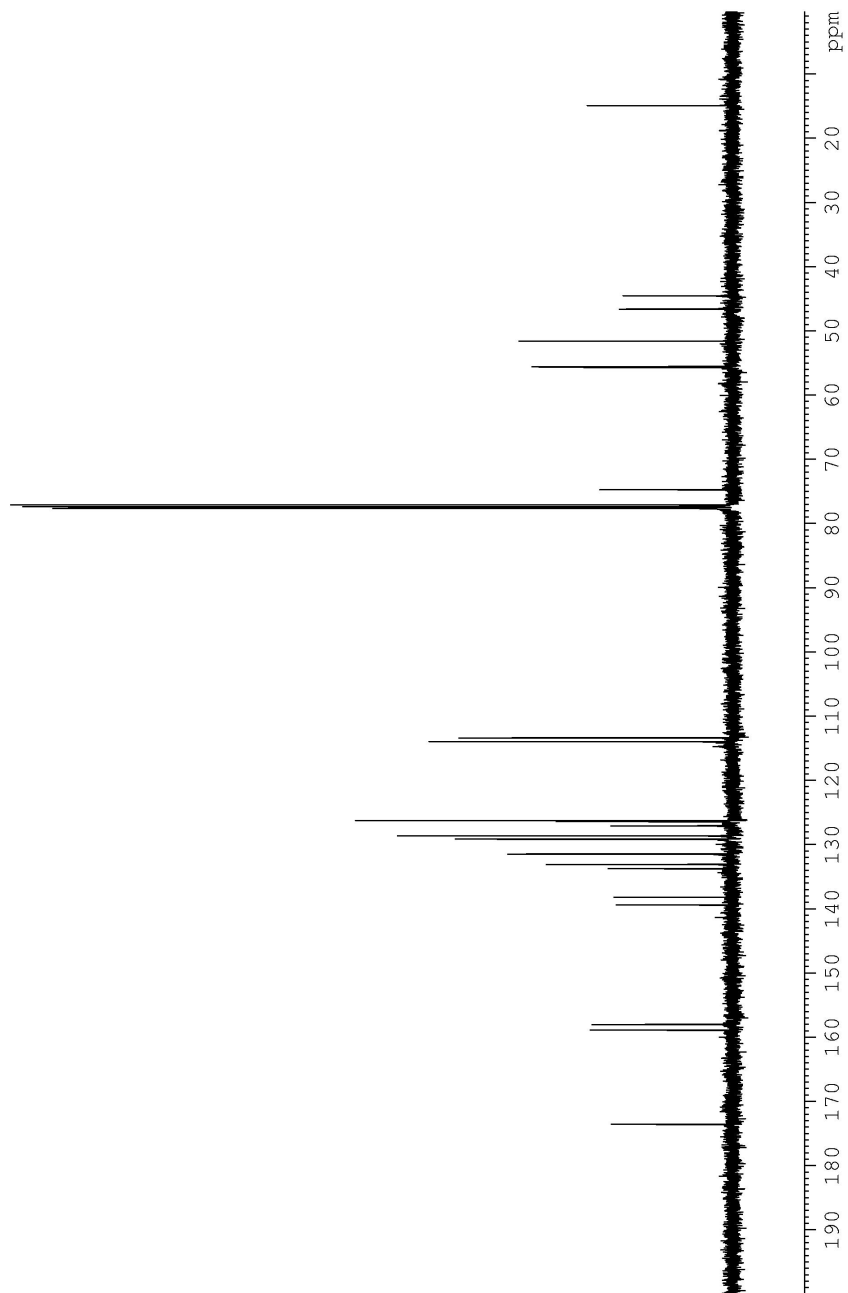

**Table 2.** 125 MHz  $^{13}\text{C}$  NMR Spectrum of Compound **3e** in  $\text{CDCl}_3$

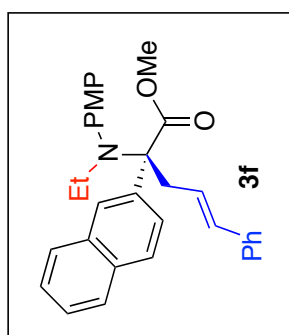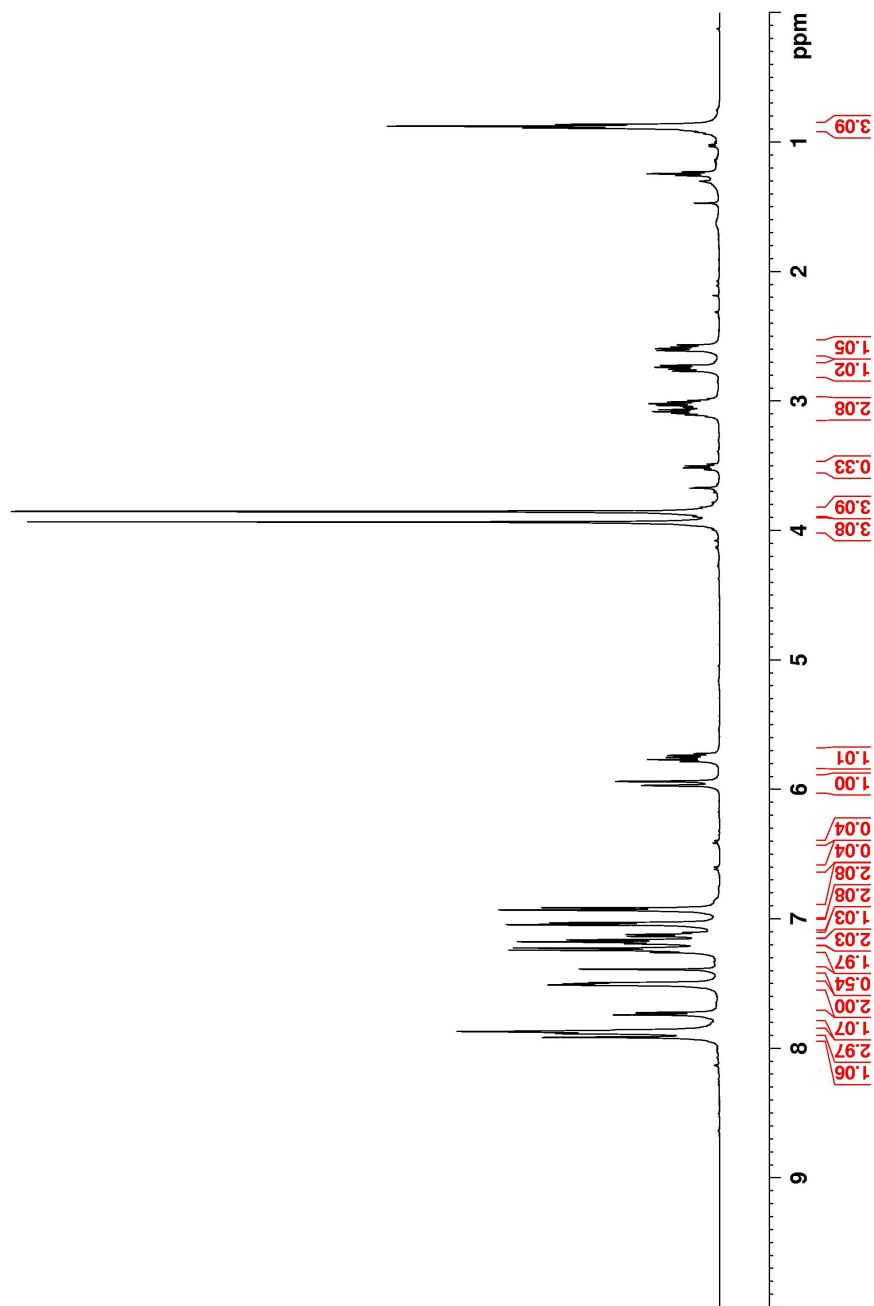

**Table 2.** 500 MHz <sup>1</sup>H NMR Spectrum of Compound **3f** in CDCl<sub>3</sub>

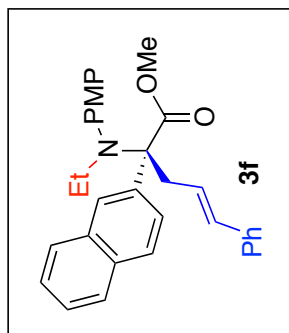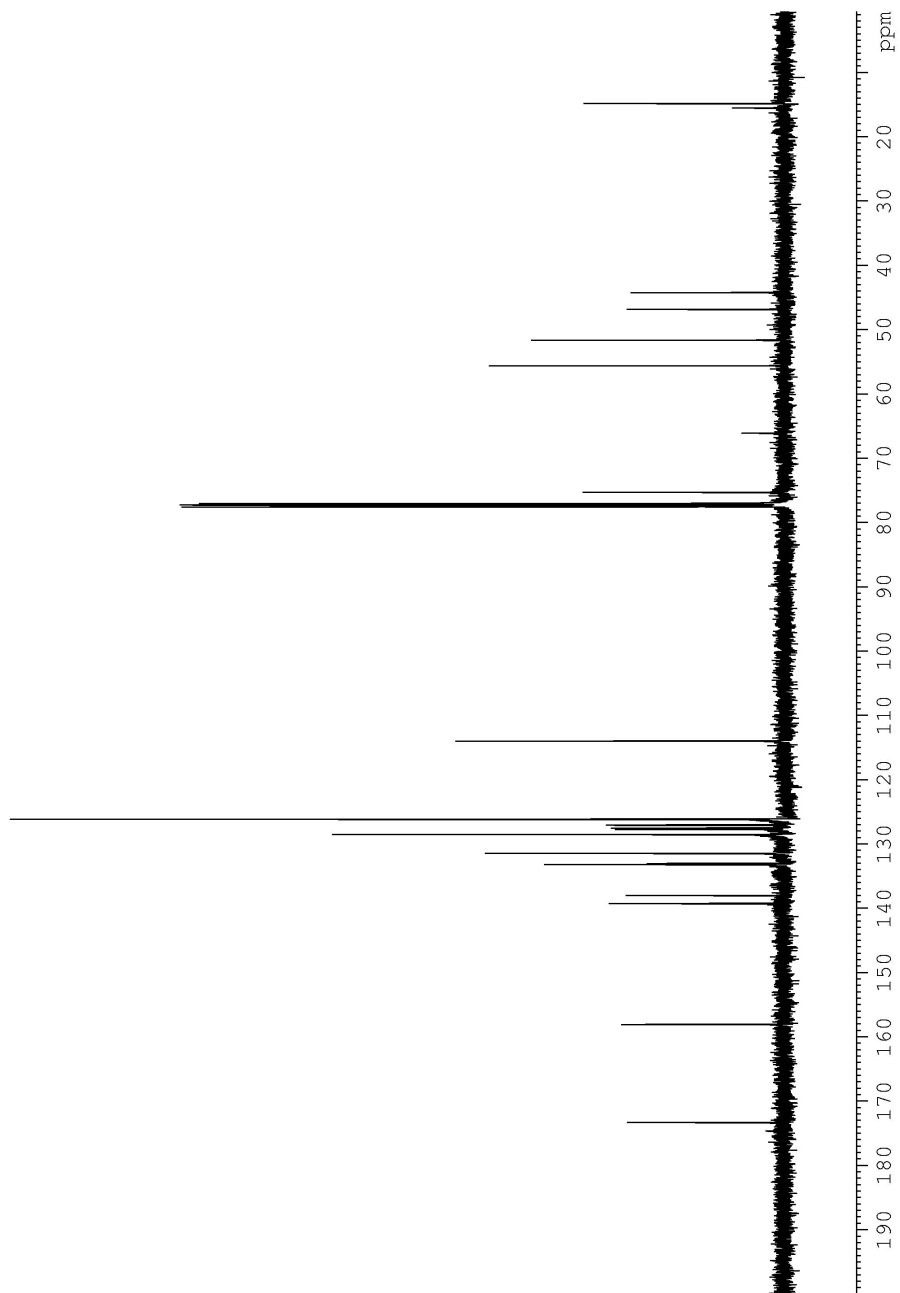

**Table 2.** 125 MHz <sup>13</sup>C NMR Spectrum of Compound **3f** in CDCl<sub>3</sub>

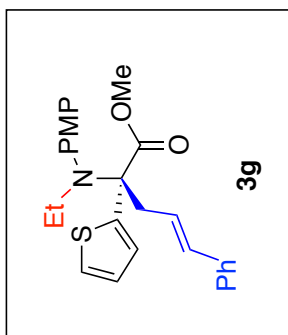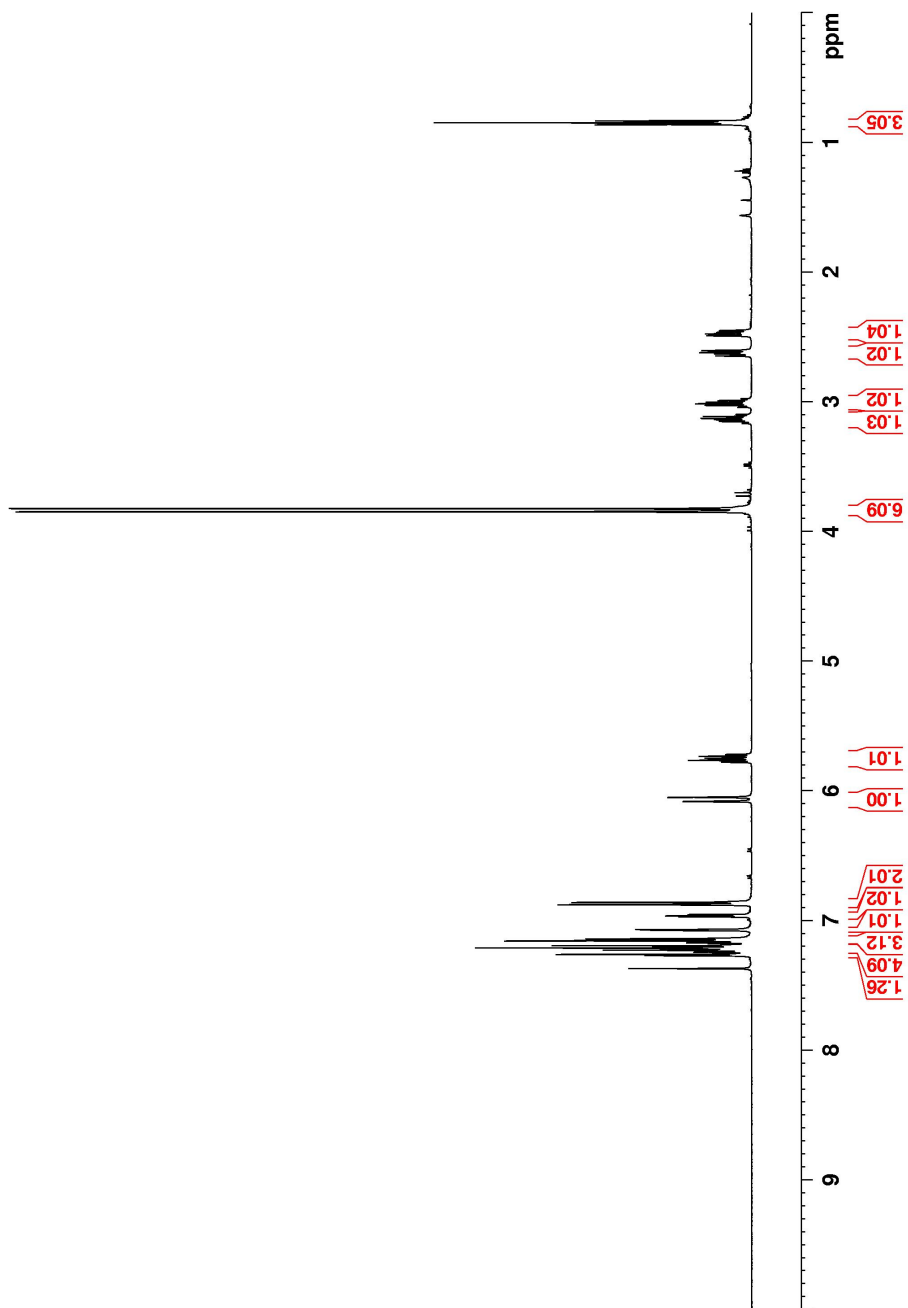

**Table 2.** 500 MHz  $^1\text{H}$  NMR Spectrum of Compound **3g** in  $\text{CDCl}_3$



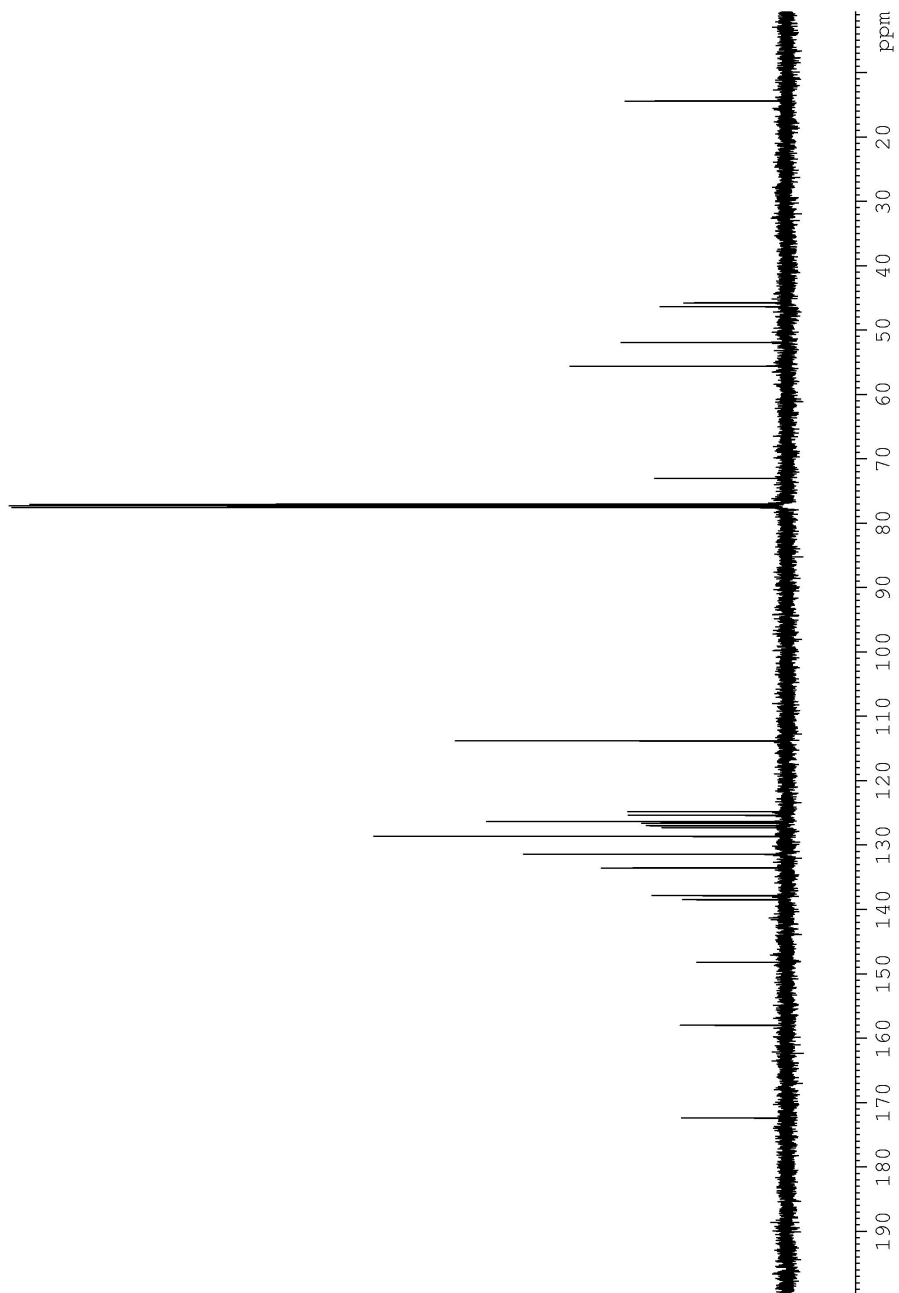

**Table 2.** 125 MHz  $^{13}\text{C}$  NMR Spectrum of Compound **3g** in  $\text{CDCl}_3$

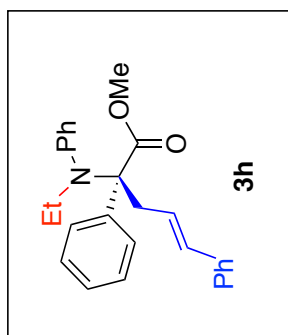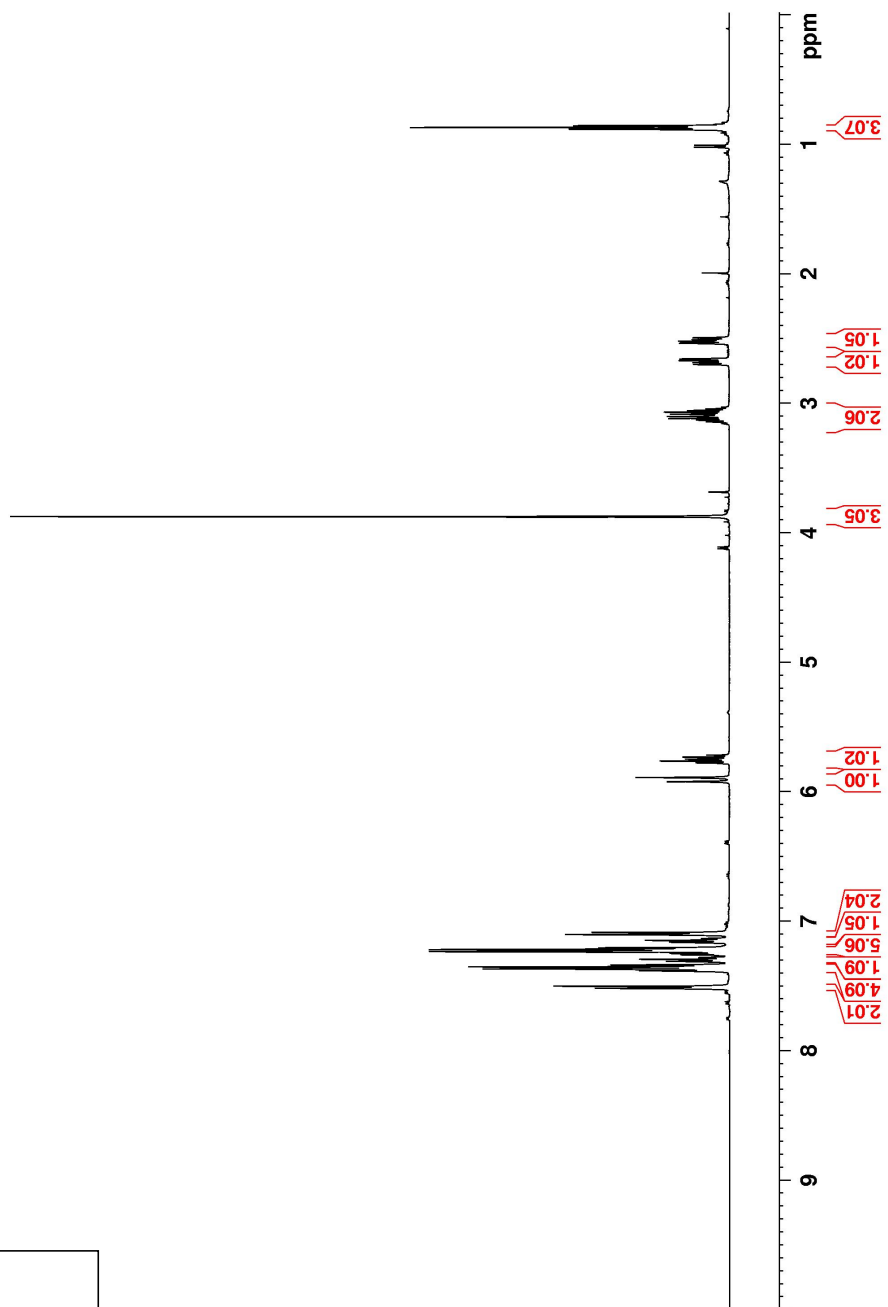

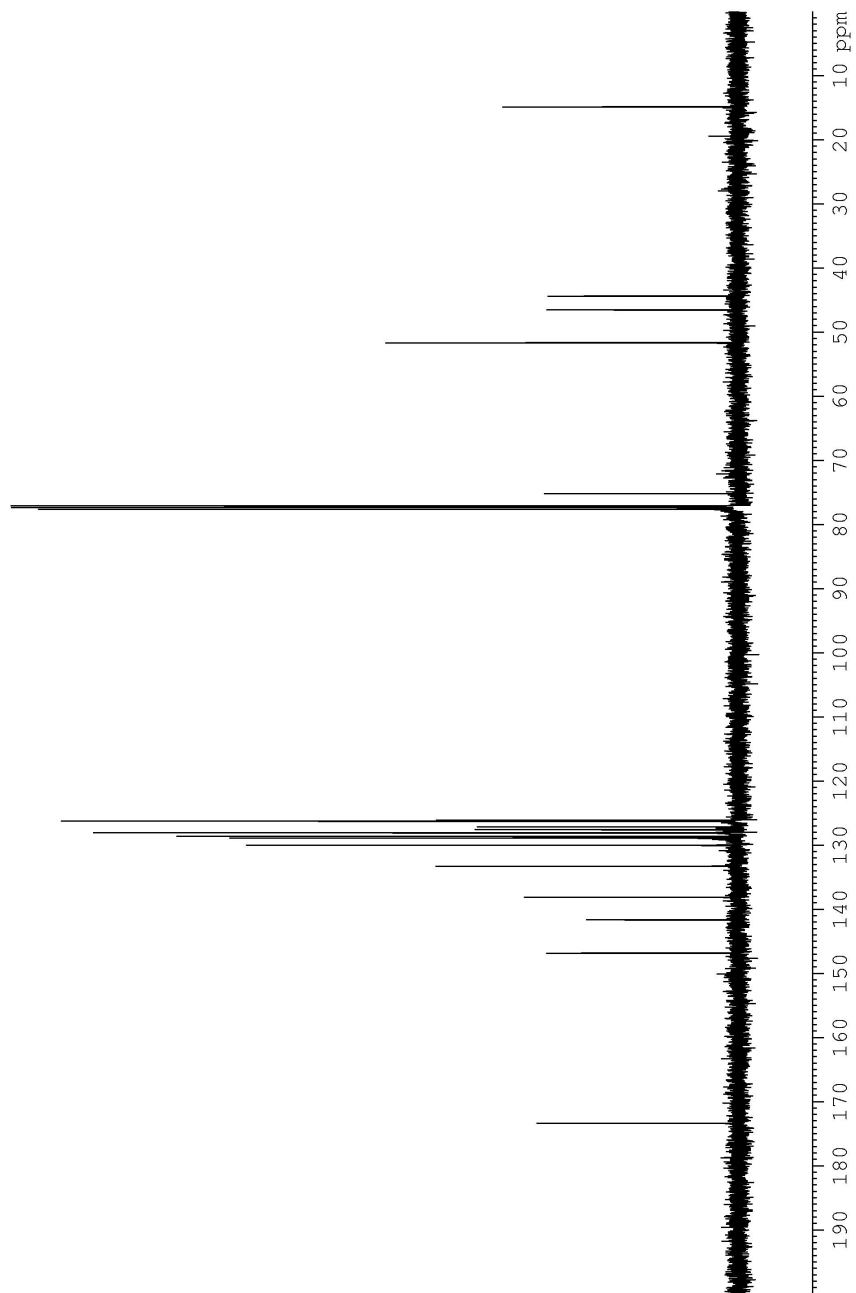

**Table 2.** 125 MHz <sup>13</sup>C NMR Spectrum of Compound **3h** in CDCl<sub>3</sub>

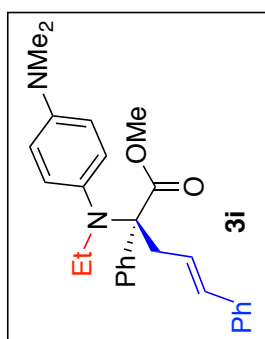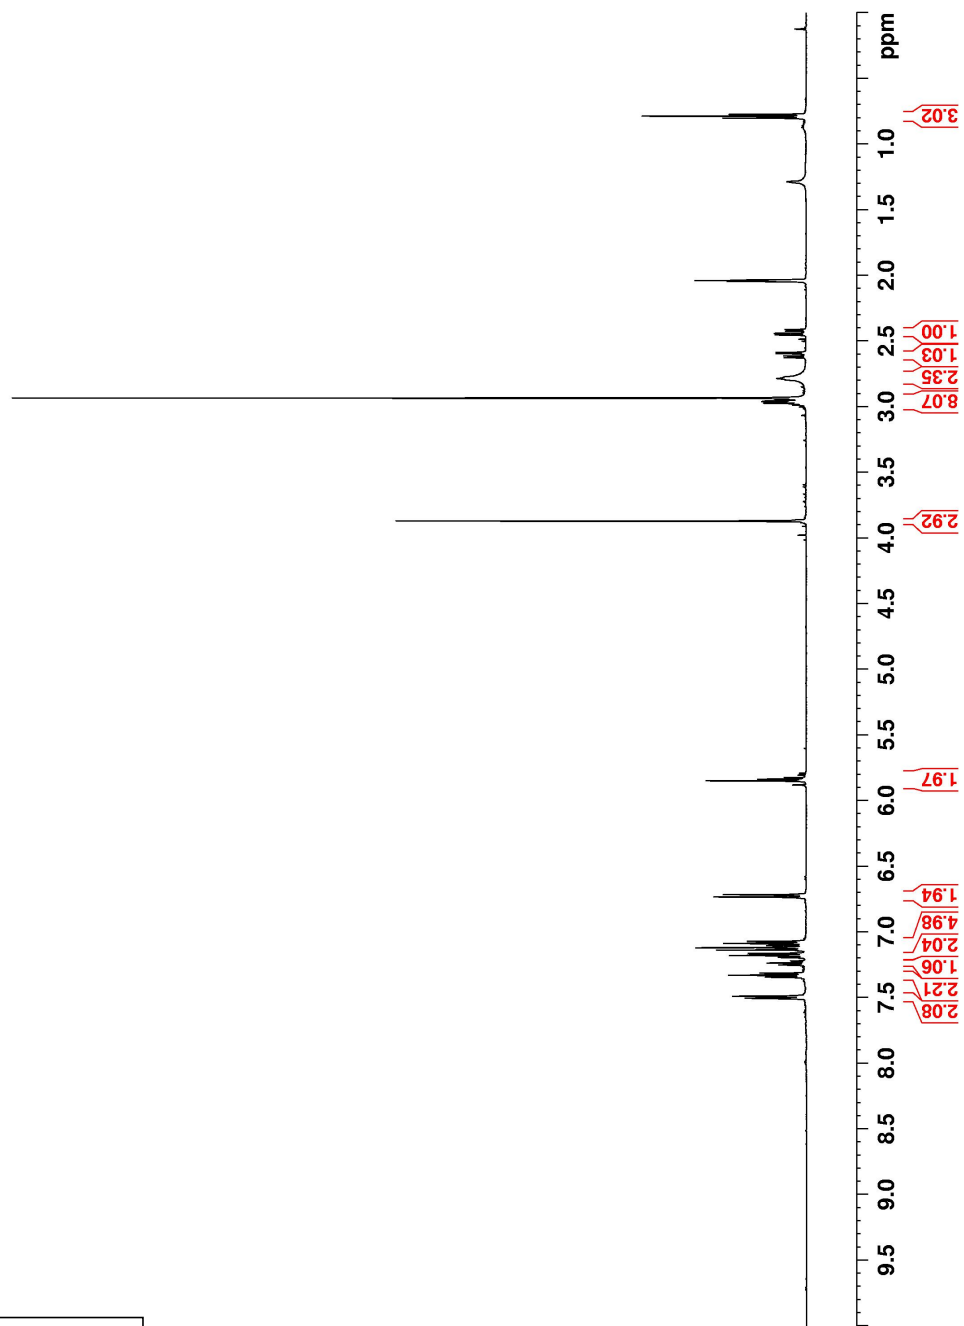

**Table 2.** 500 MHz <sup>1</sup>H NMR Spectrum of Compound **3i** in (CD<sub>3</sub>)<sub>2</sub>CO

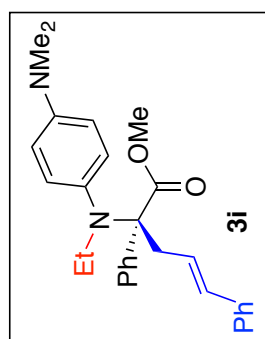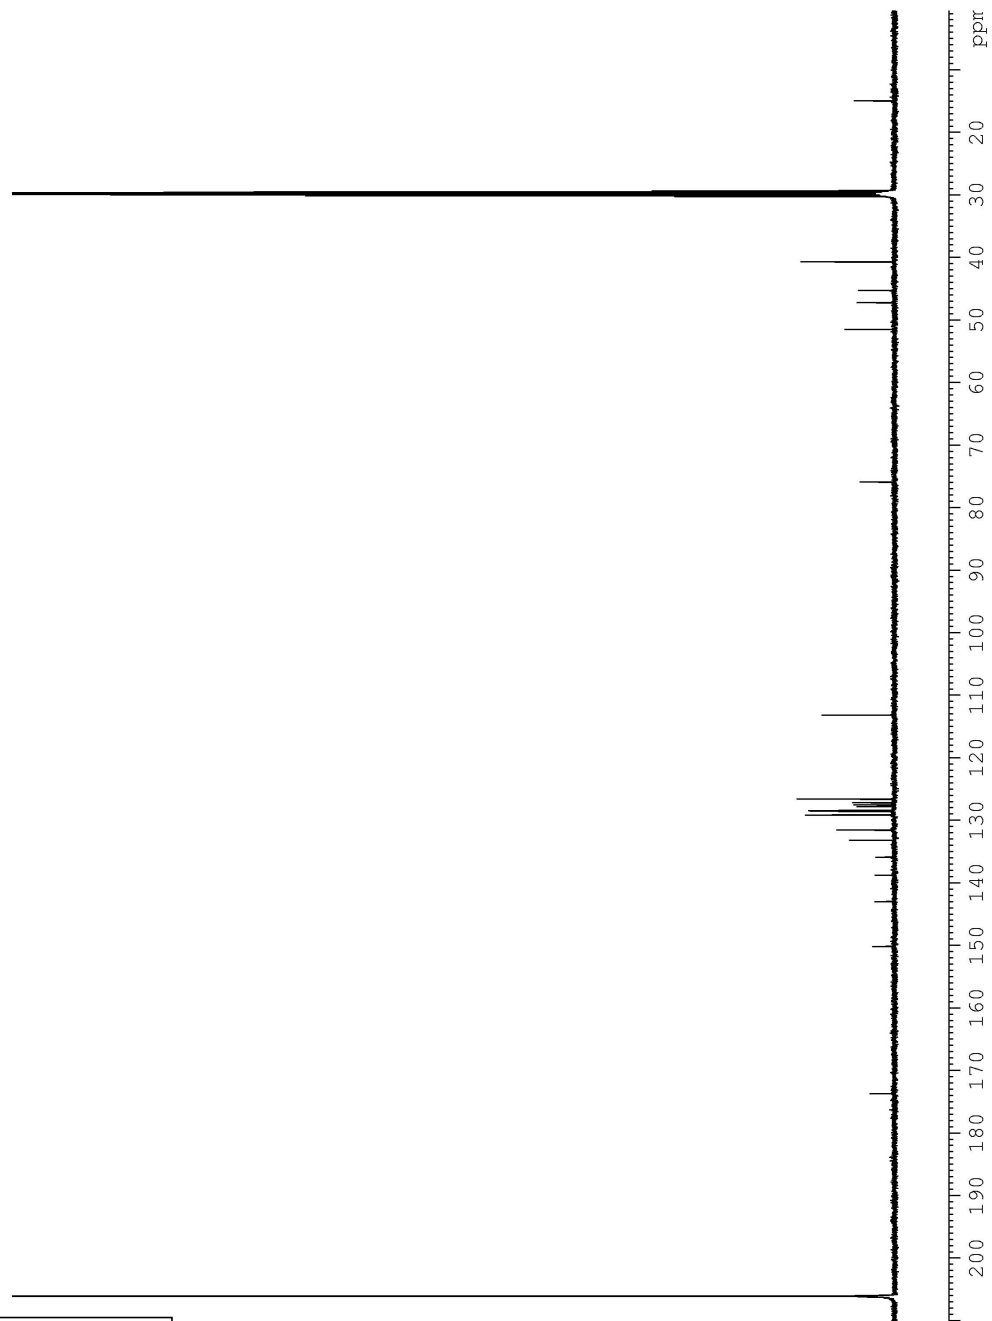

**Table 2.** 125 MHz <sup>13</sup>C NMR Spectrum of Compound **3i** in (CD<sub>3</sub>)<sub>2</sub>CO

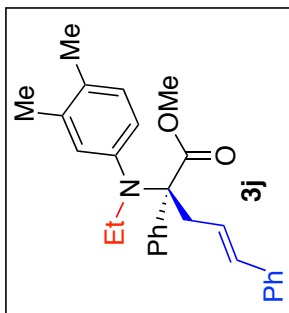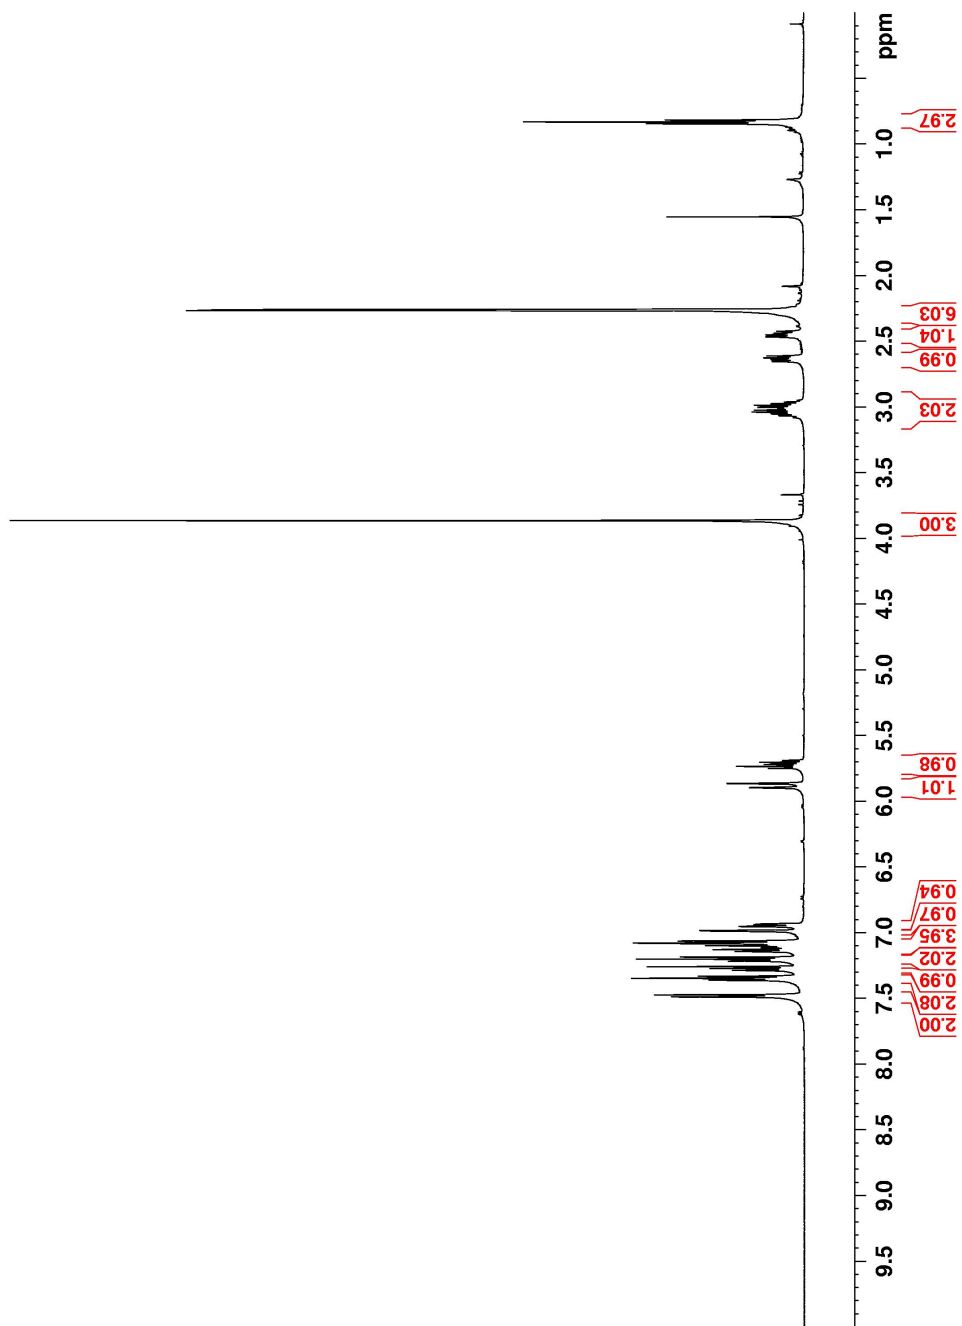

**Table 2.** 500 MHz <sup>1</sup>H NMR Spectrum of Compound 3j in CDCl<sub>3</sub>

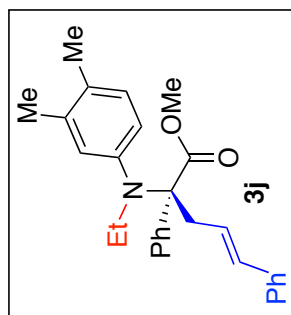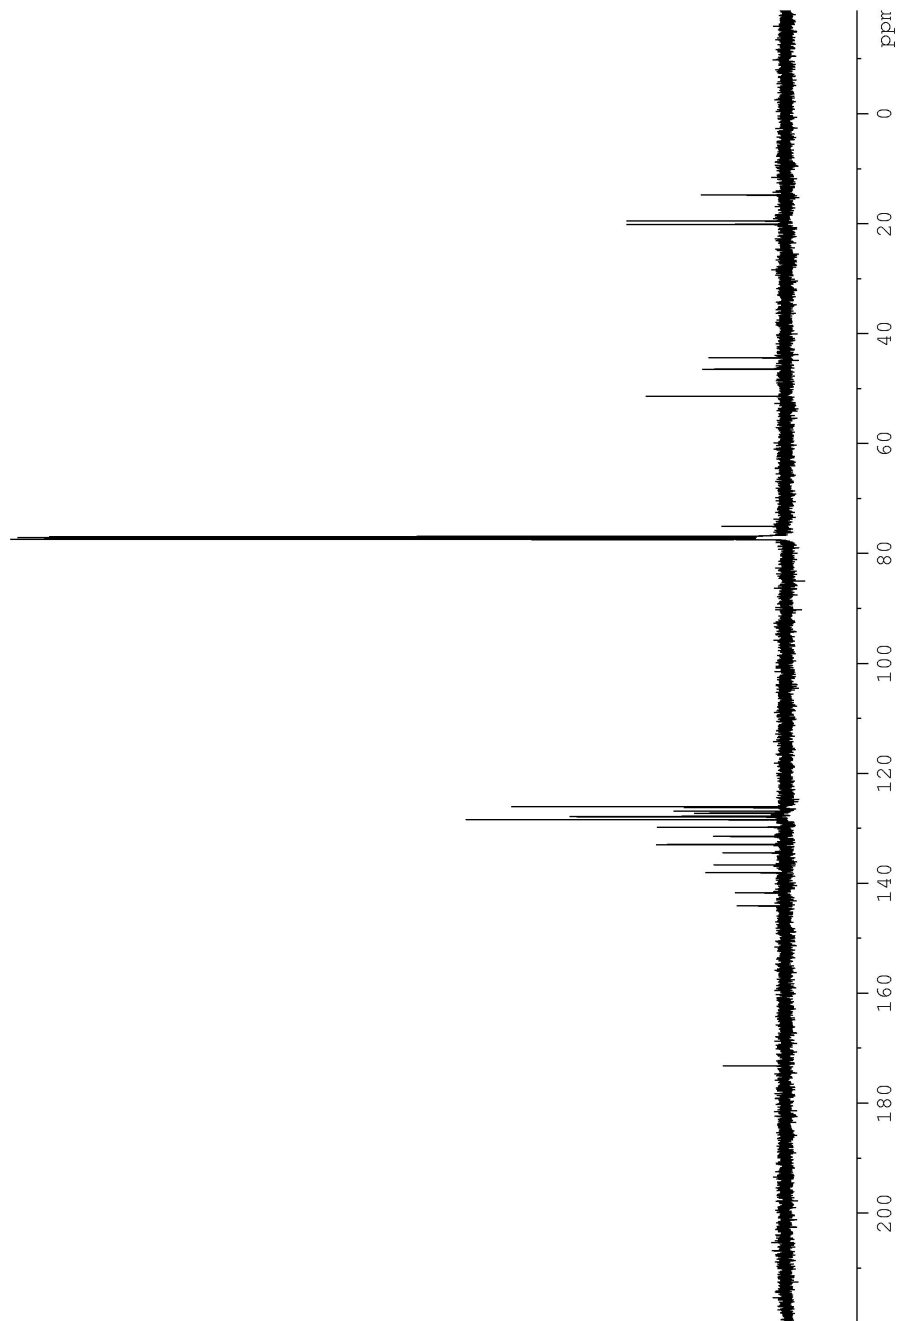

**Table 2.** 125 MHz <sup>13</sup>C NMR Spectrum of Compound **3j** in CDCl<sub>3</sub>

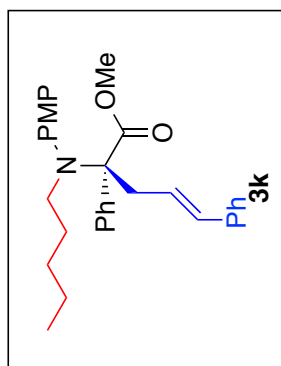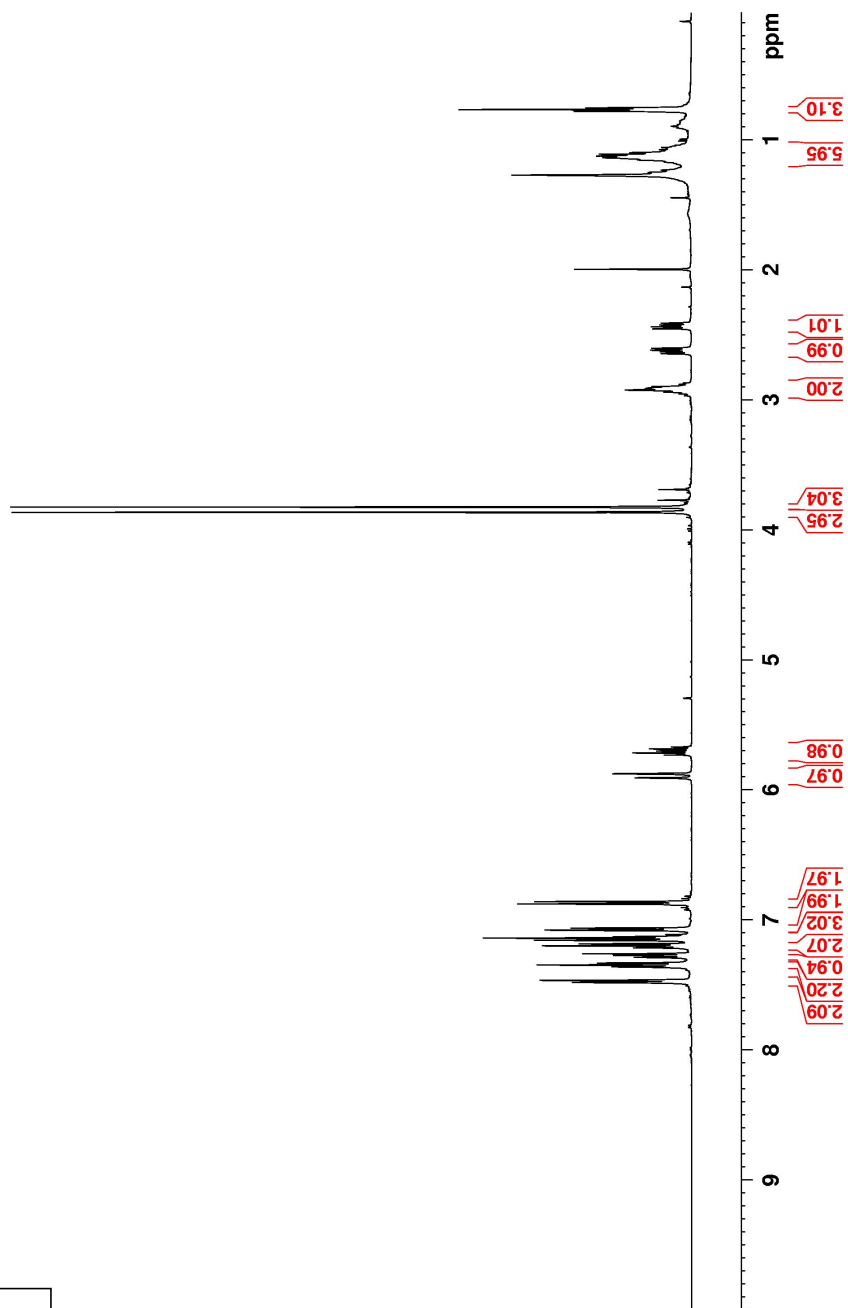

**Table 3.** 500 MHz  $^1\text{H}$  NMR Spectrum of Compound **3k** in  $\text{CDCl}_3$



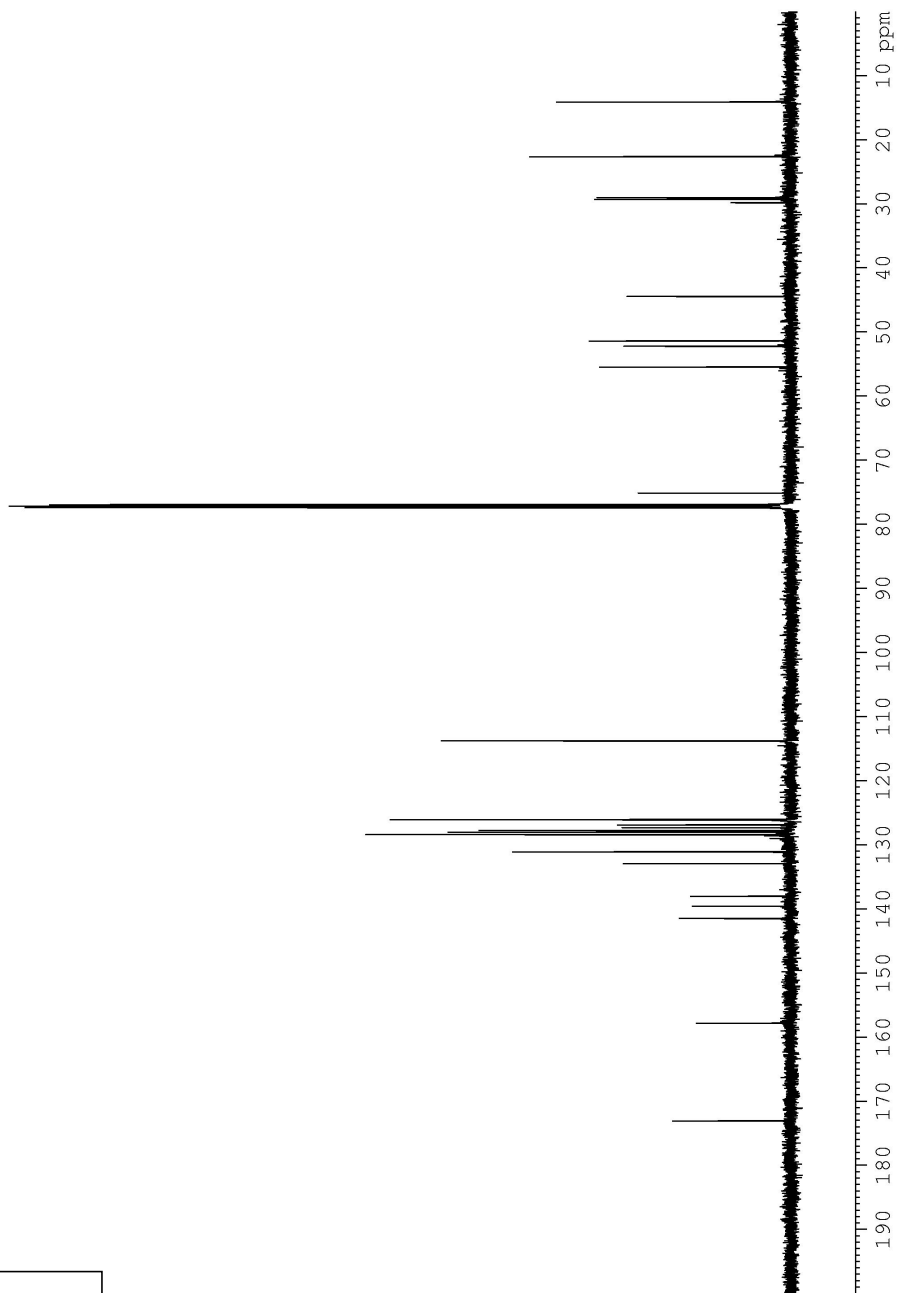

**Table 3.** 125 MHz <sup>13</sup>C NMR Spectrum of Compound **3k** in CDCl<sub>3</sub>

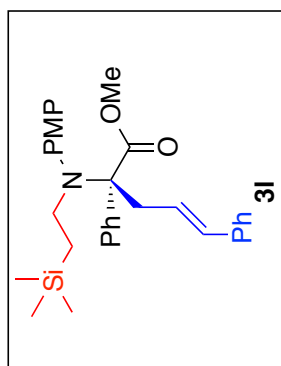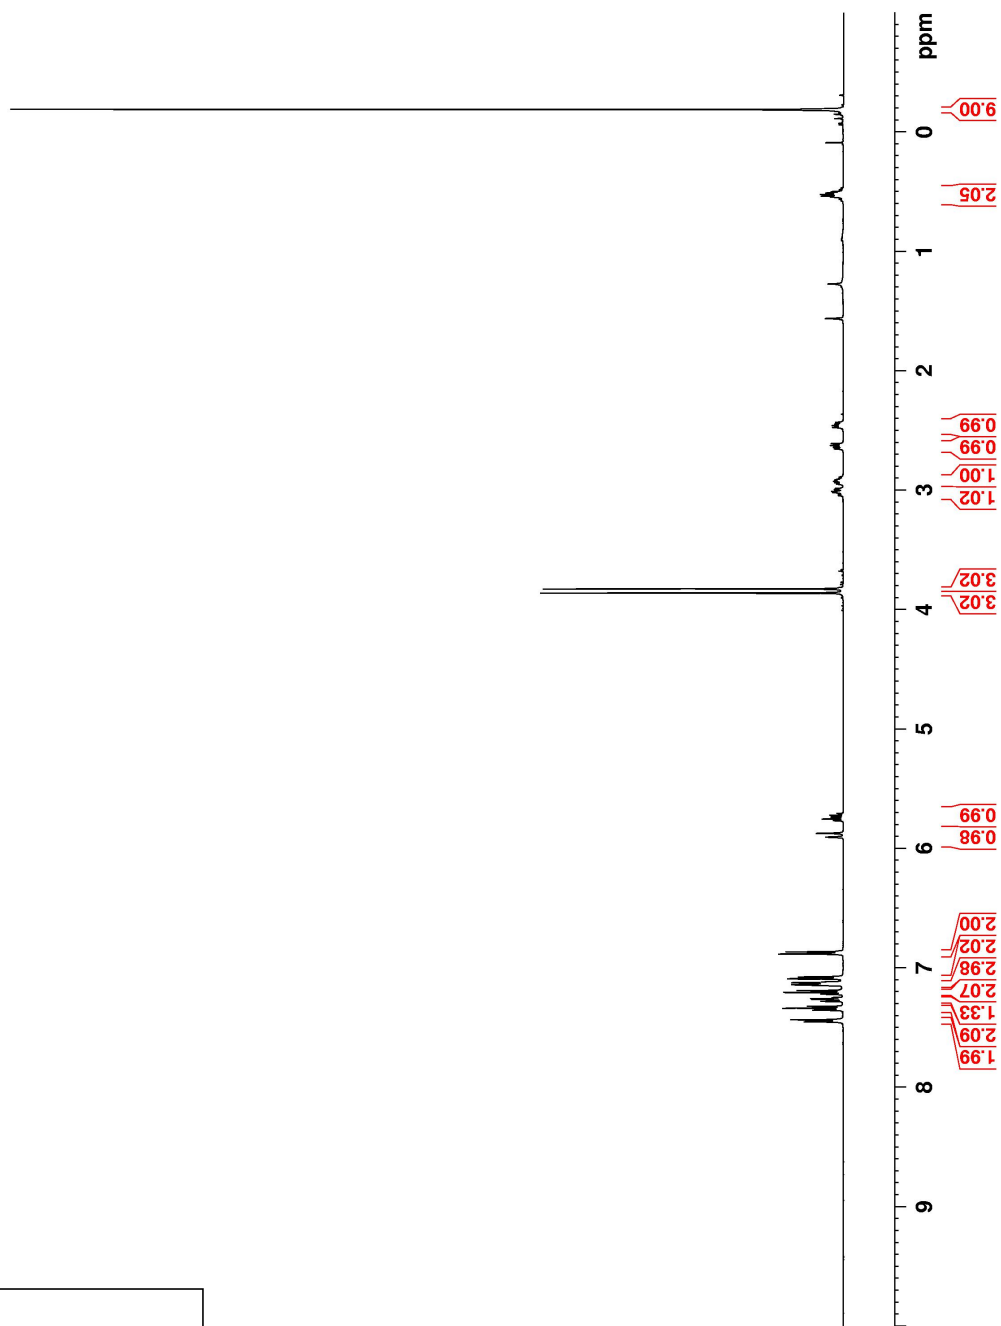

**Table 3.** 500 MHz <sup>1</sup>H NMR Spectrum of Compound **3I** in CDCl<sub>3</sub>

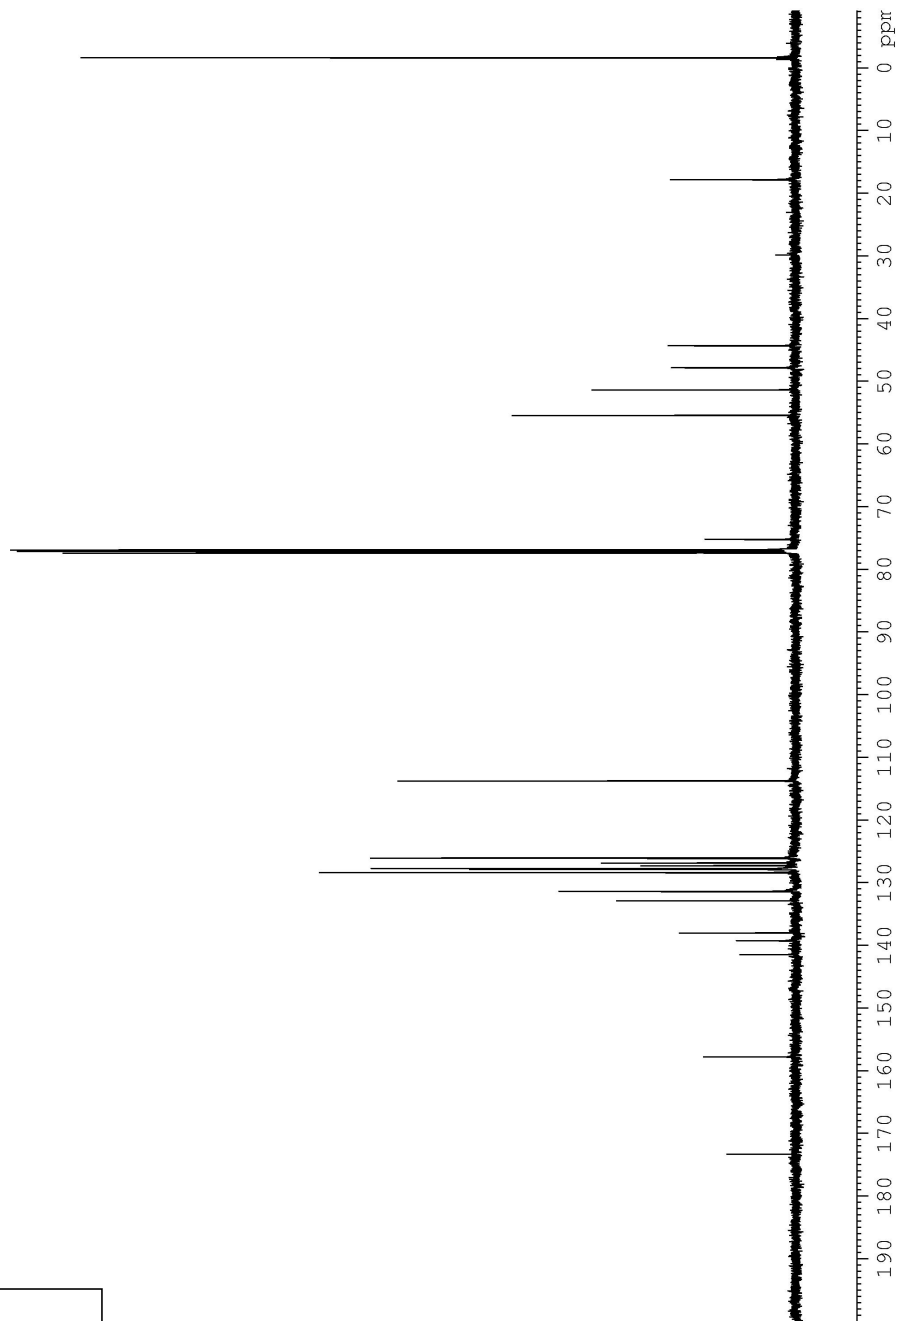

**Table 3.** 125 MHz <sup>13</sup>C NMR Spectrum of Compound **3I** in CDCl<sub>3</sub>

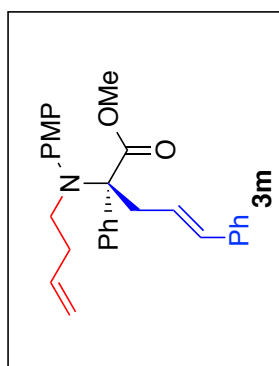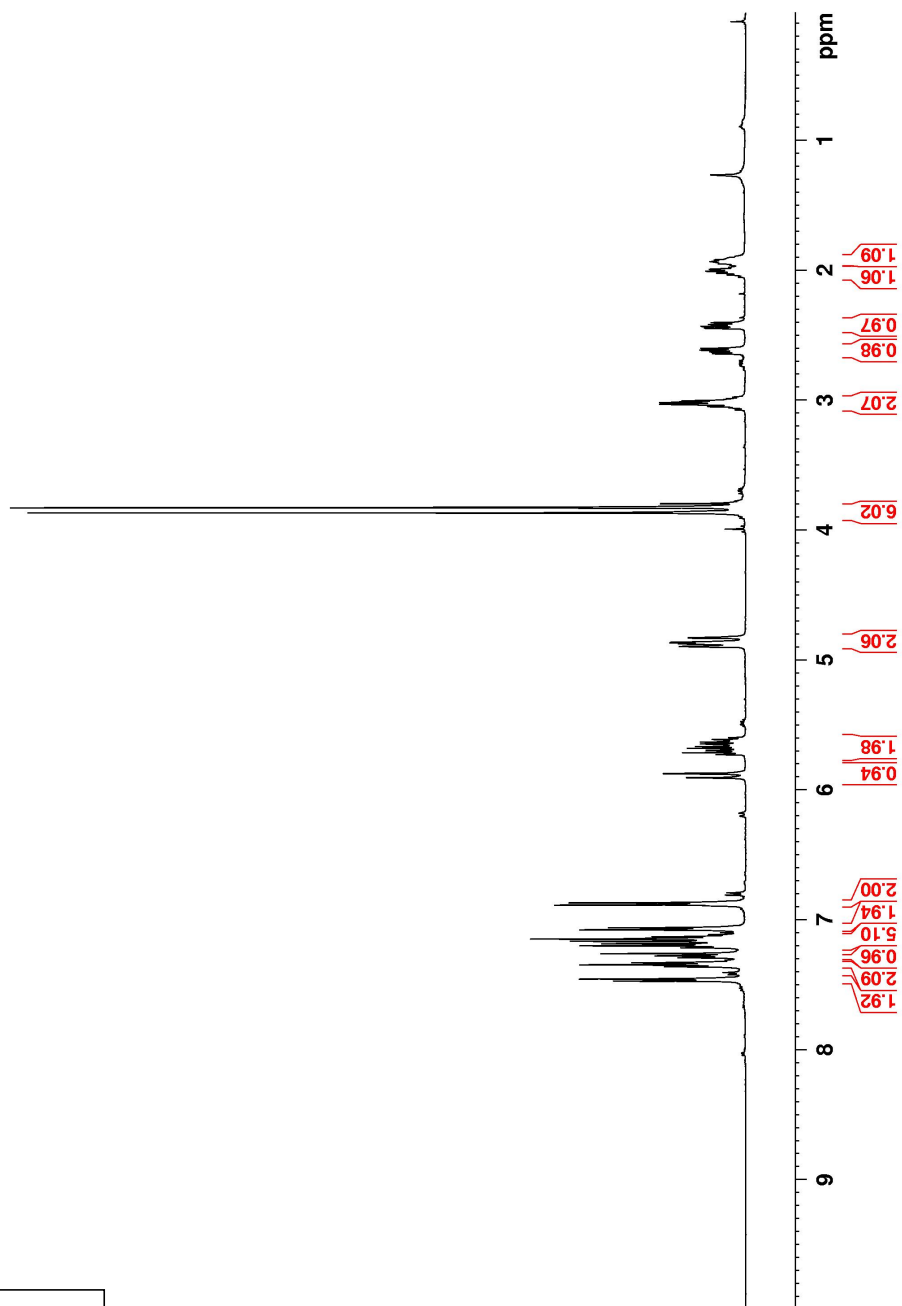

**Table 3.** 500 MHz <sup>1</sup>H NMR Spectrum of Compound **3m** in CDCl<sub>3</sub>

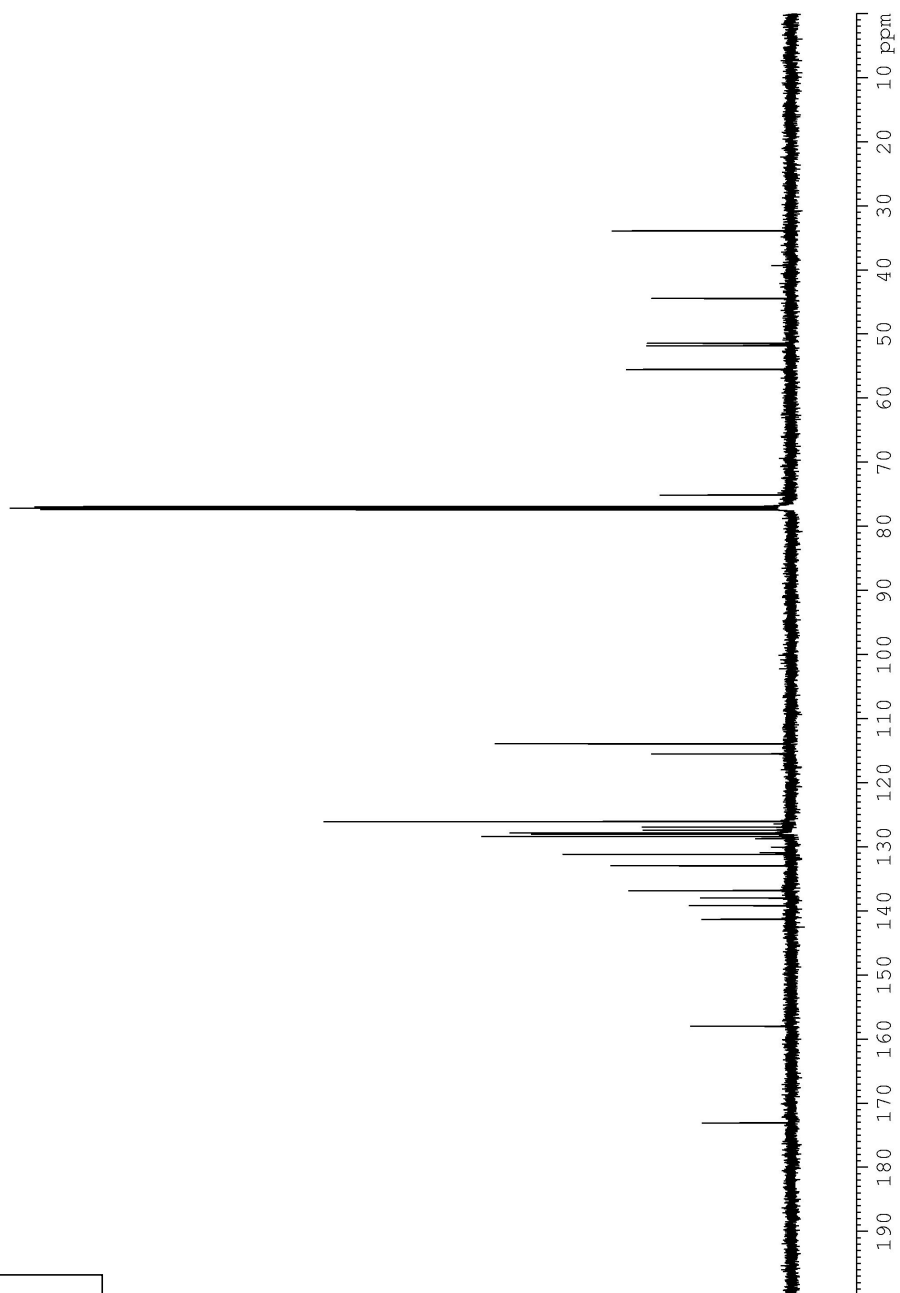

**Table 3.** 125 MHz  $^{13}\text{C}$  NMR Spectrum of Compound **3m** in  $\text{CDCl}_3$

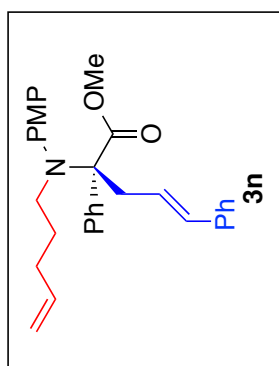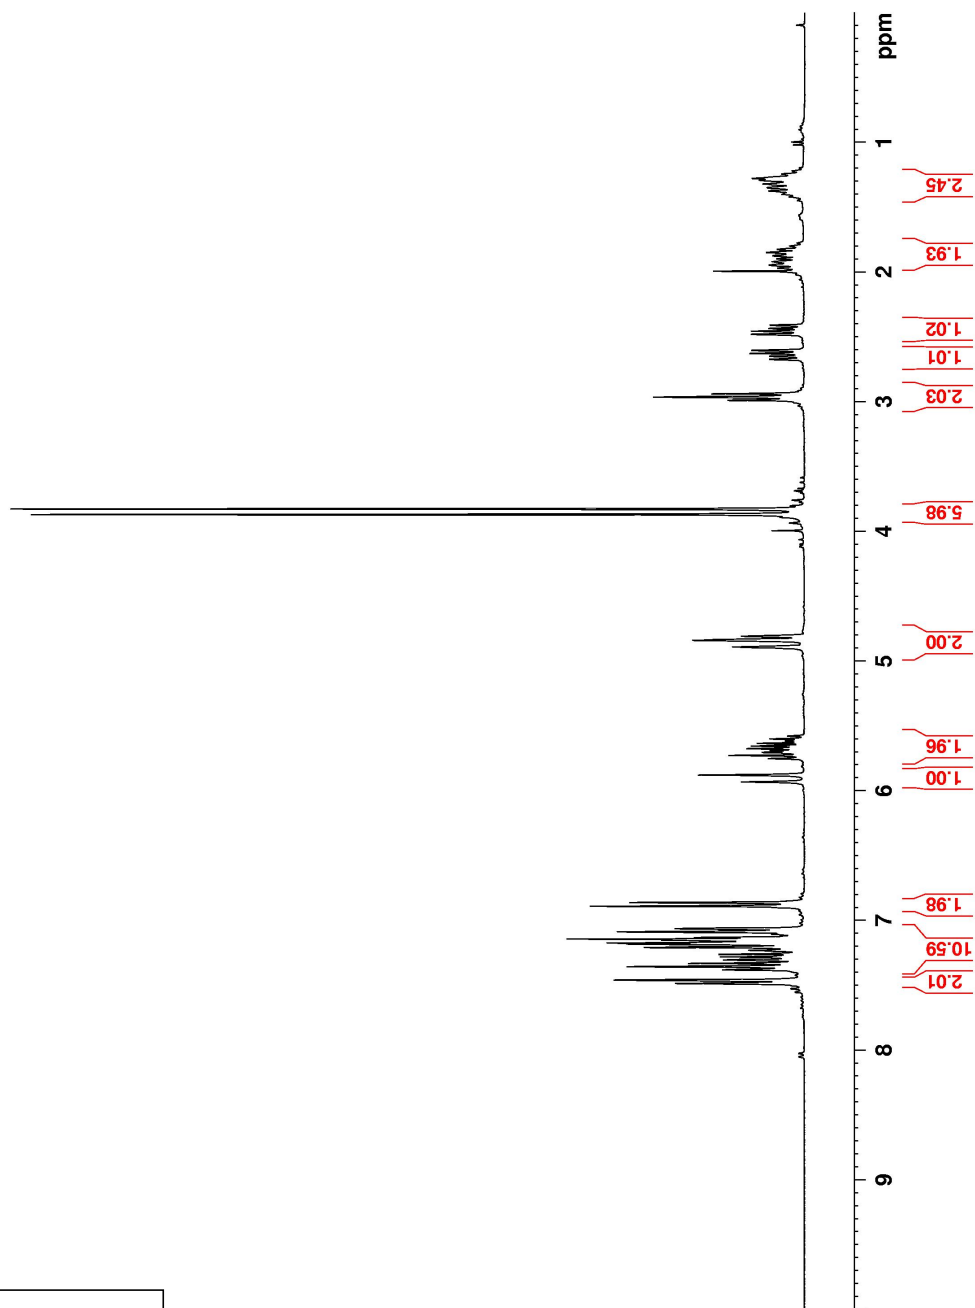

**Table 3.** 500 MHz <sup>1</sup>H NMR Spectrum of Compound **3n** in CDCl<sub>3</sub>

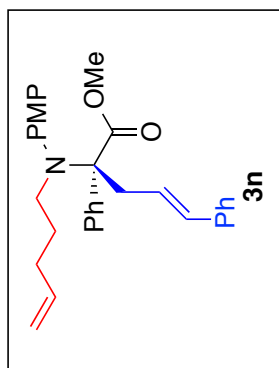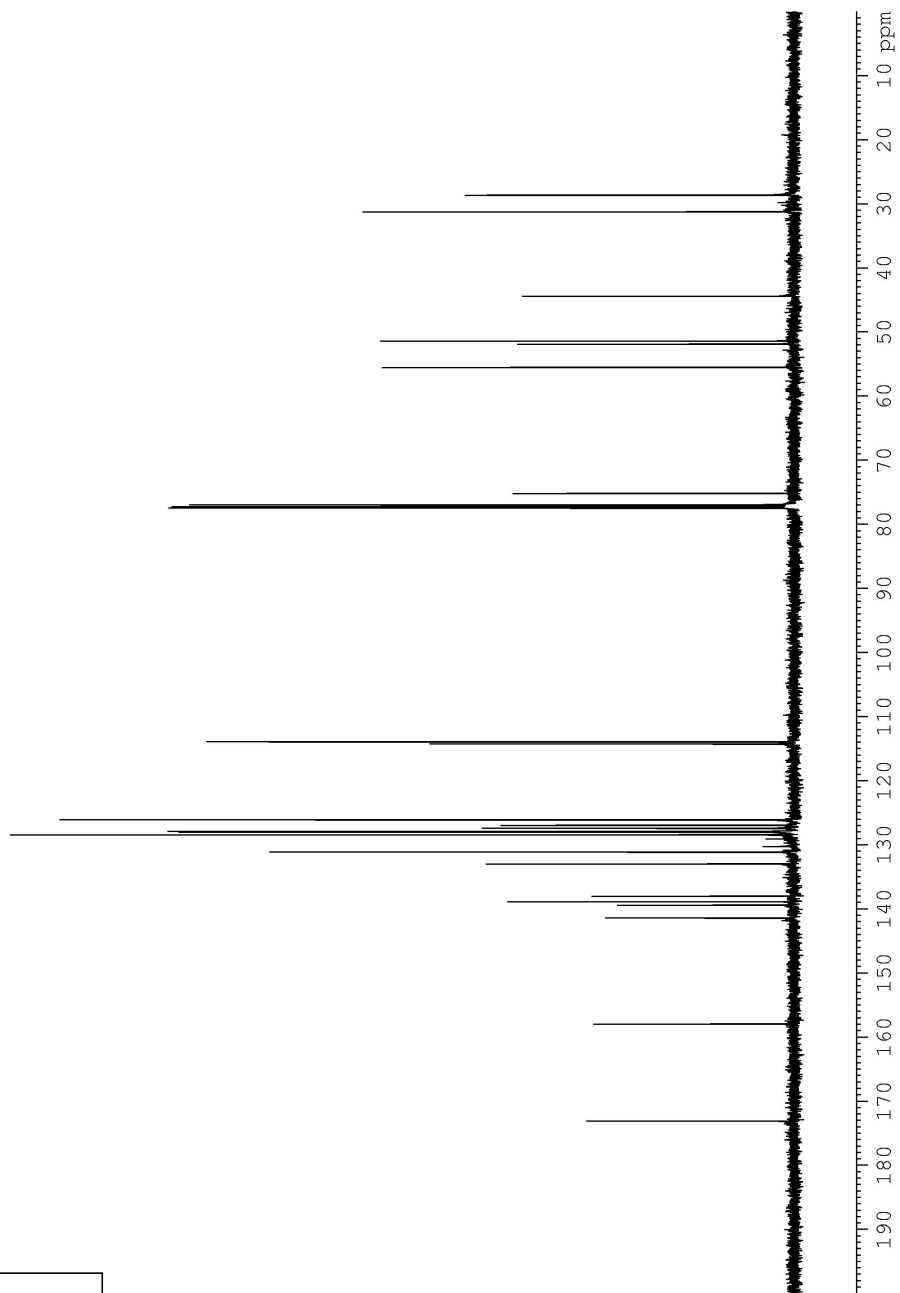

**Table 3** 125 MHz  $^{13}\text{C}$  NMR Spectrum of Compound **3n** in  $\text{CDCl}_3$

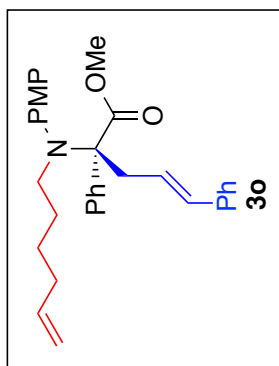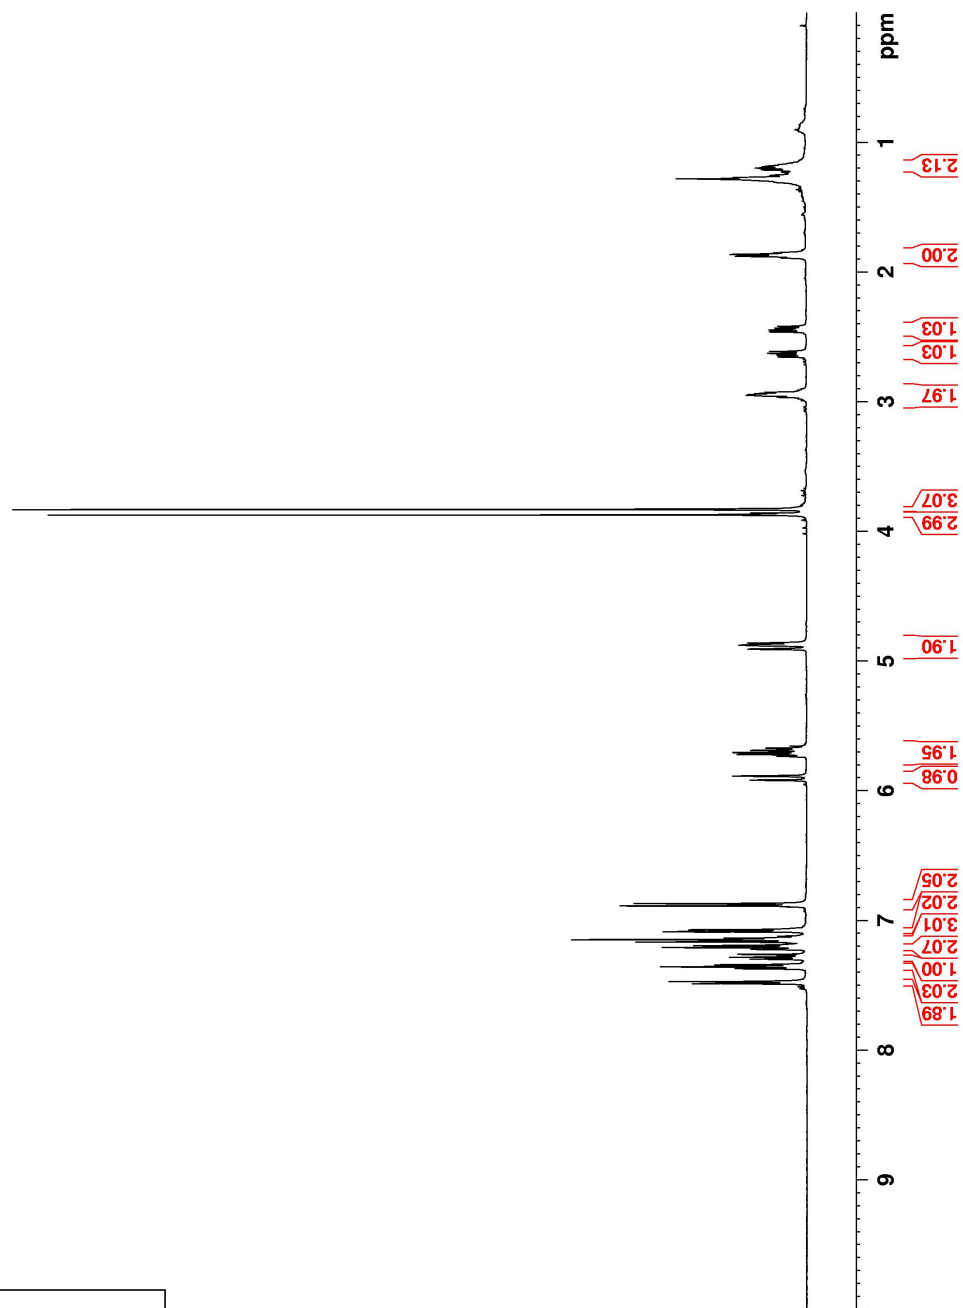

**Table 3.** 500 MHz  $^1\text{H}$  NMR Spectrum of Compound **30** in  $\text{CDCl}_3$



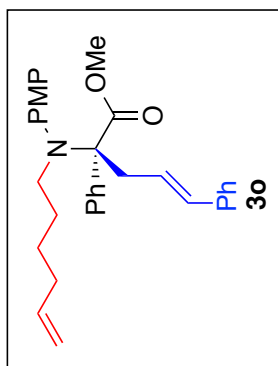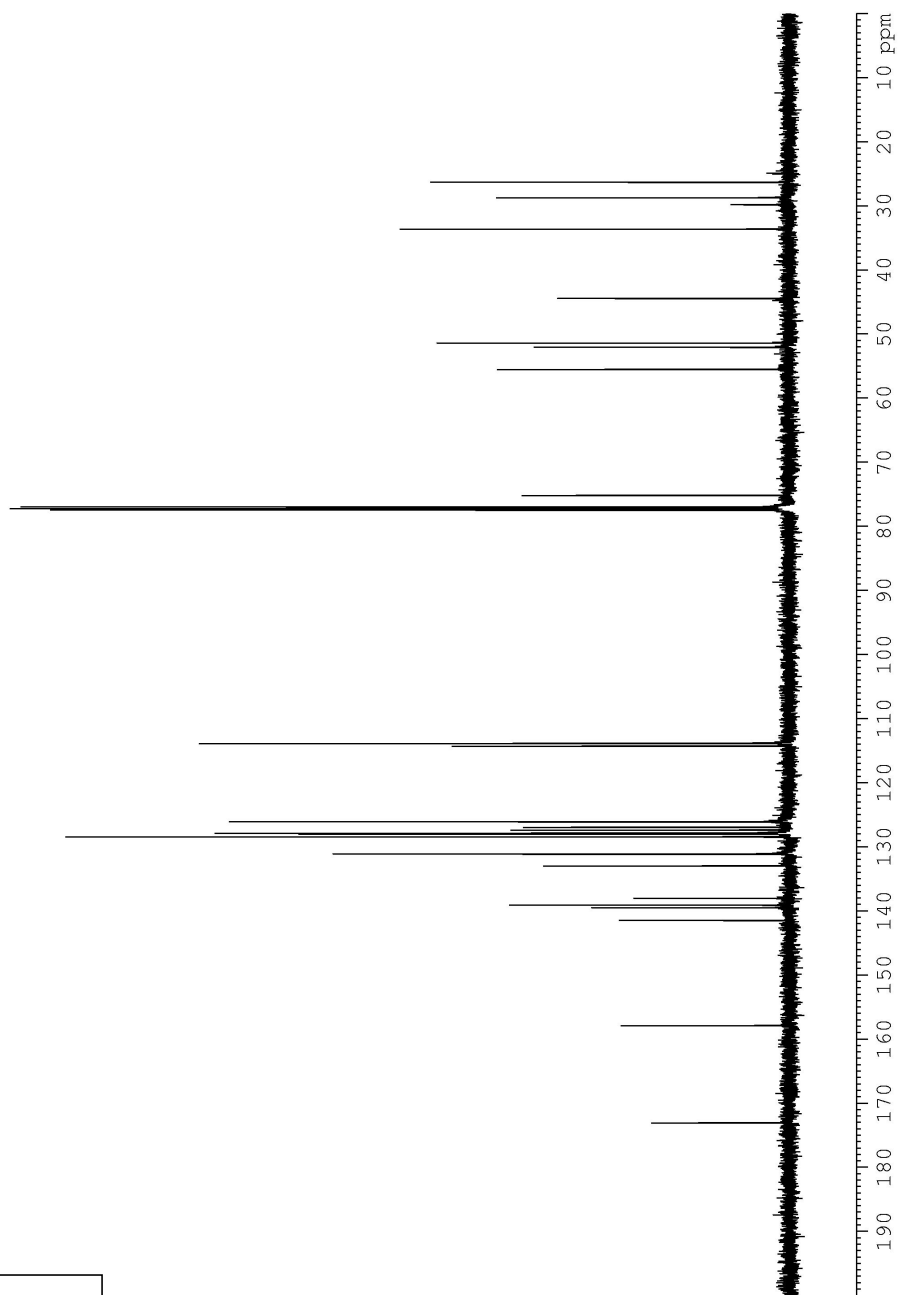

**Table 3.** 125 MHz  $^{13}\text{C}$  NMR Spectrum of Compound **30** in  $\text{CDCl}_3$

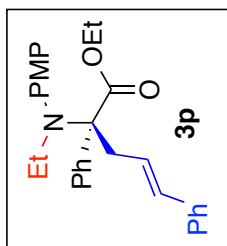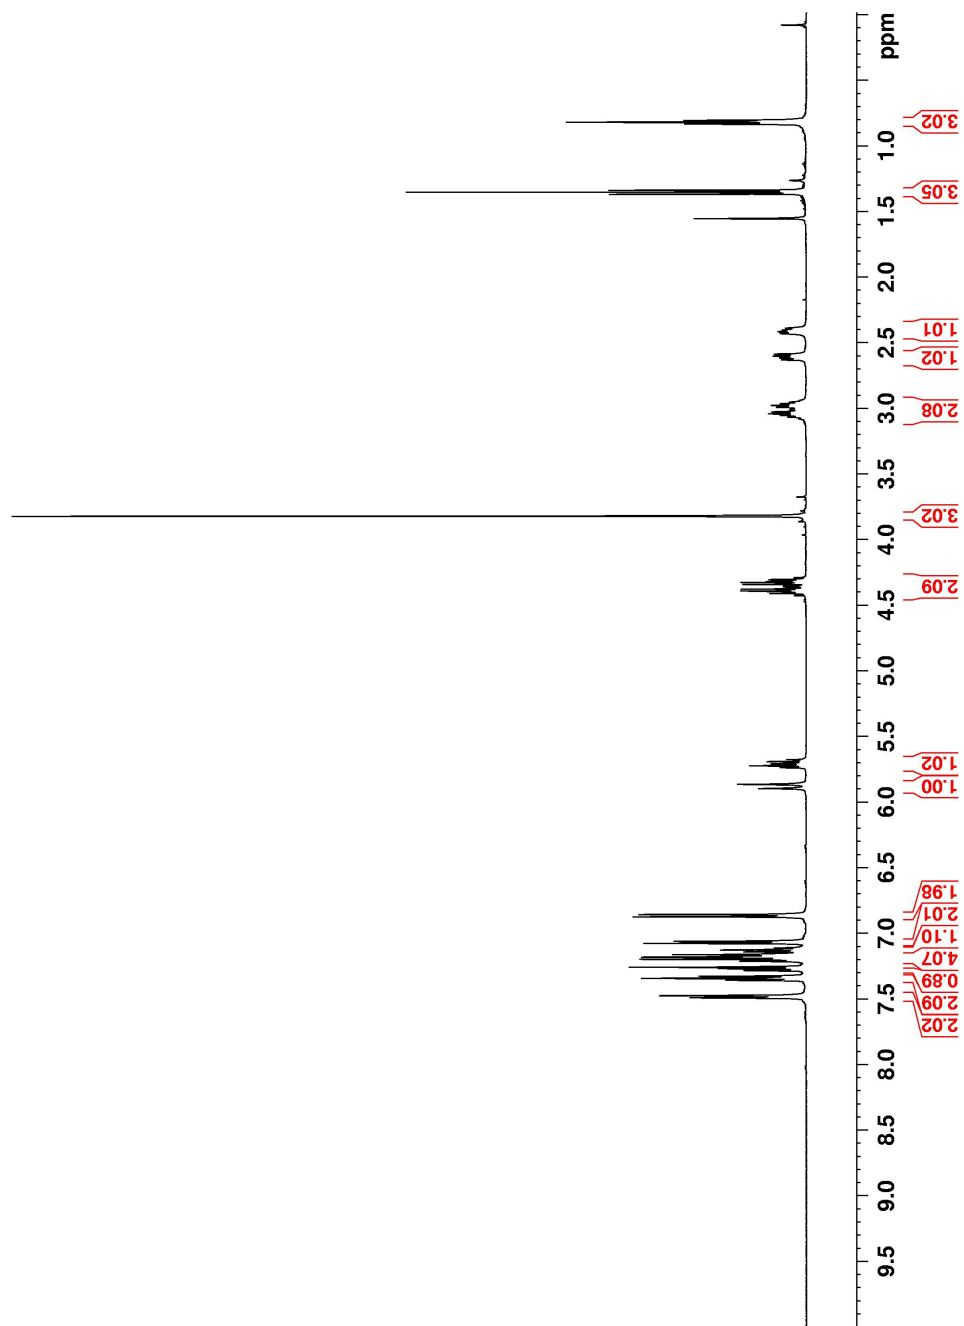

500 MHz <sup>1</sup>H NMR Spectrum of Compound **3p** in CDCl<sub>3</sub>

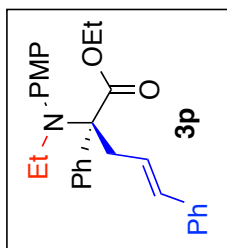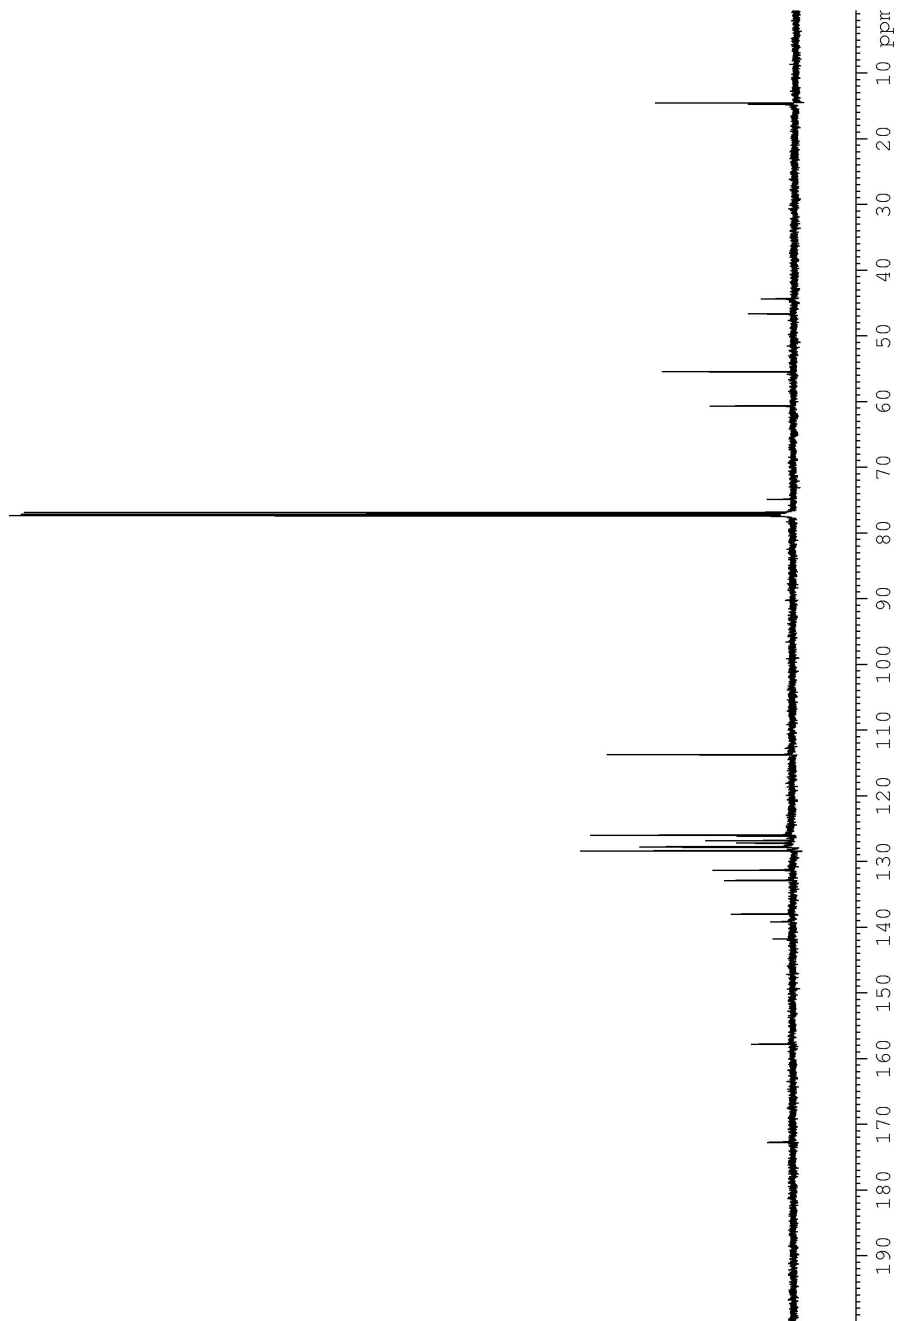

125 MHz <sup>13</sup>C NMR Spectrum of Compound **3p** in CDCl<sub>3</sub>

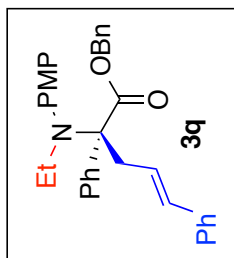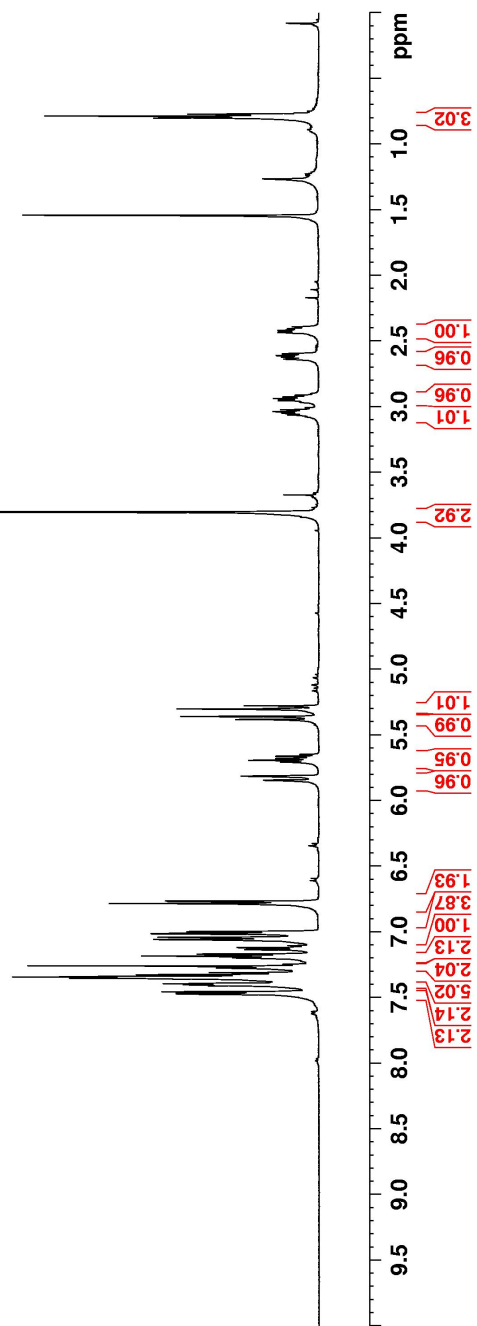

500 MHz <sup>1</sup>H NMR Spectrum of Compound **3q** in CDCl<sub>3</sub>

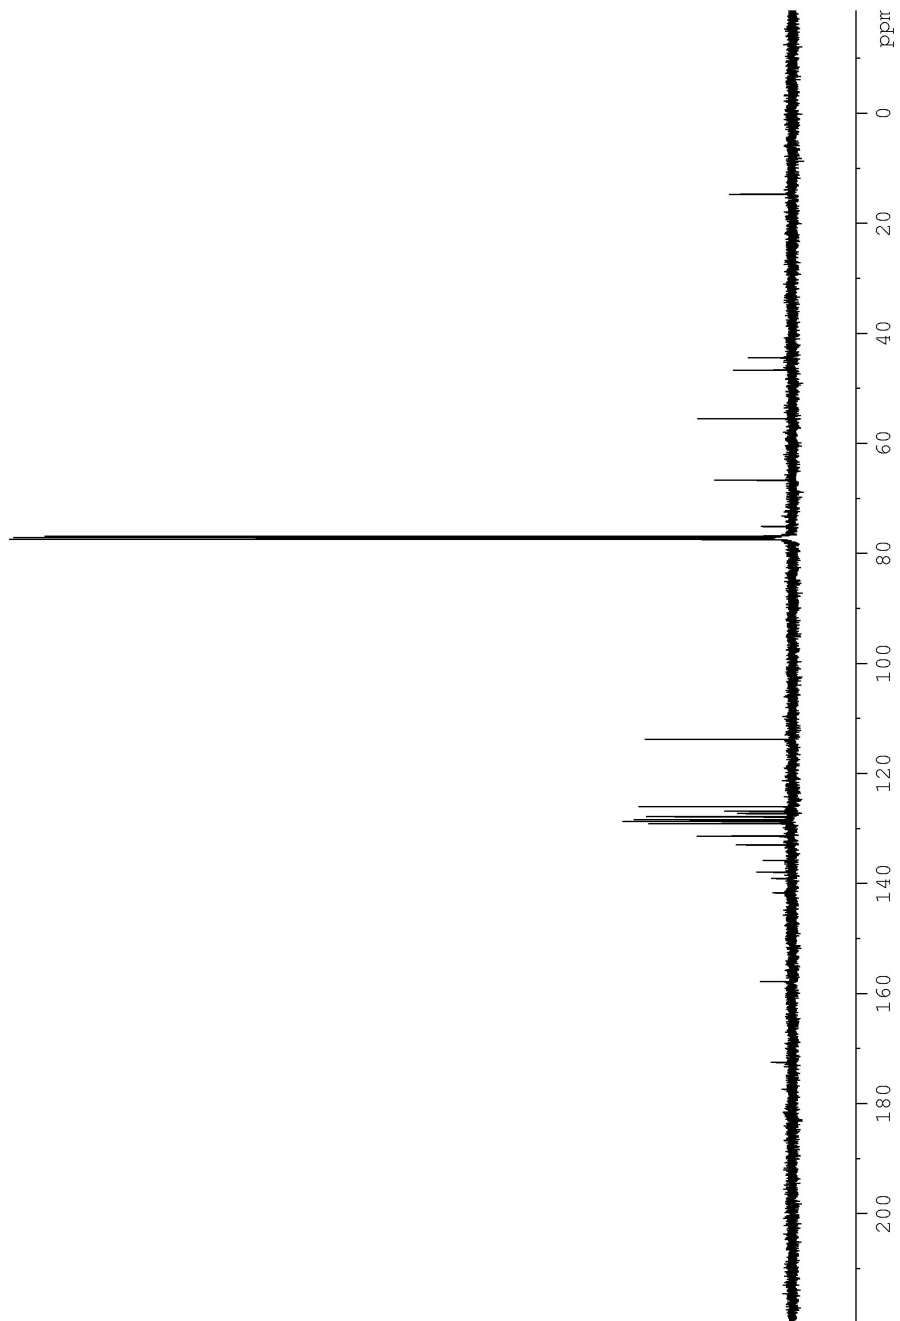

125 MHz  $^{13}\text{C}$  NMR Spectrum of Compound **3q** in  $\text{CDCl}_3$

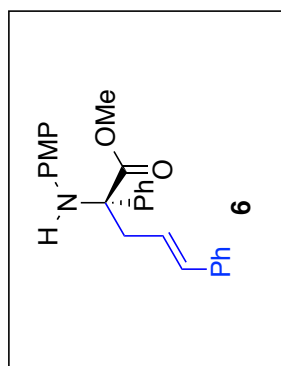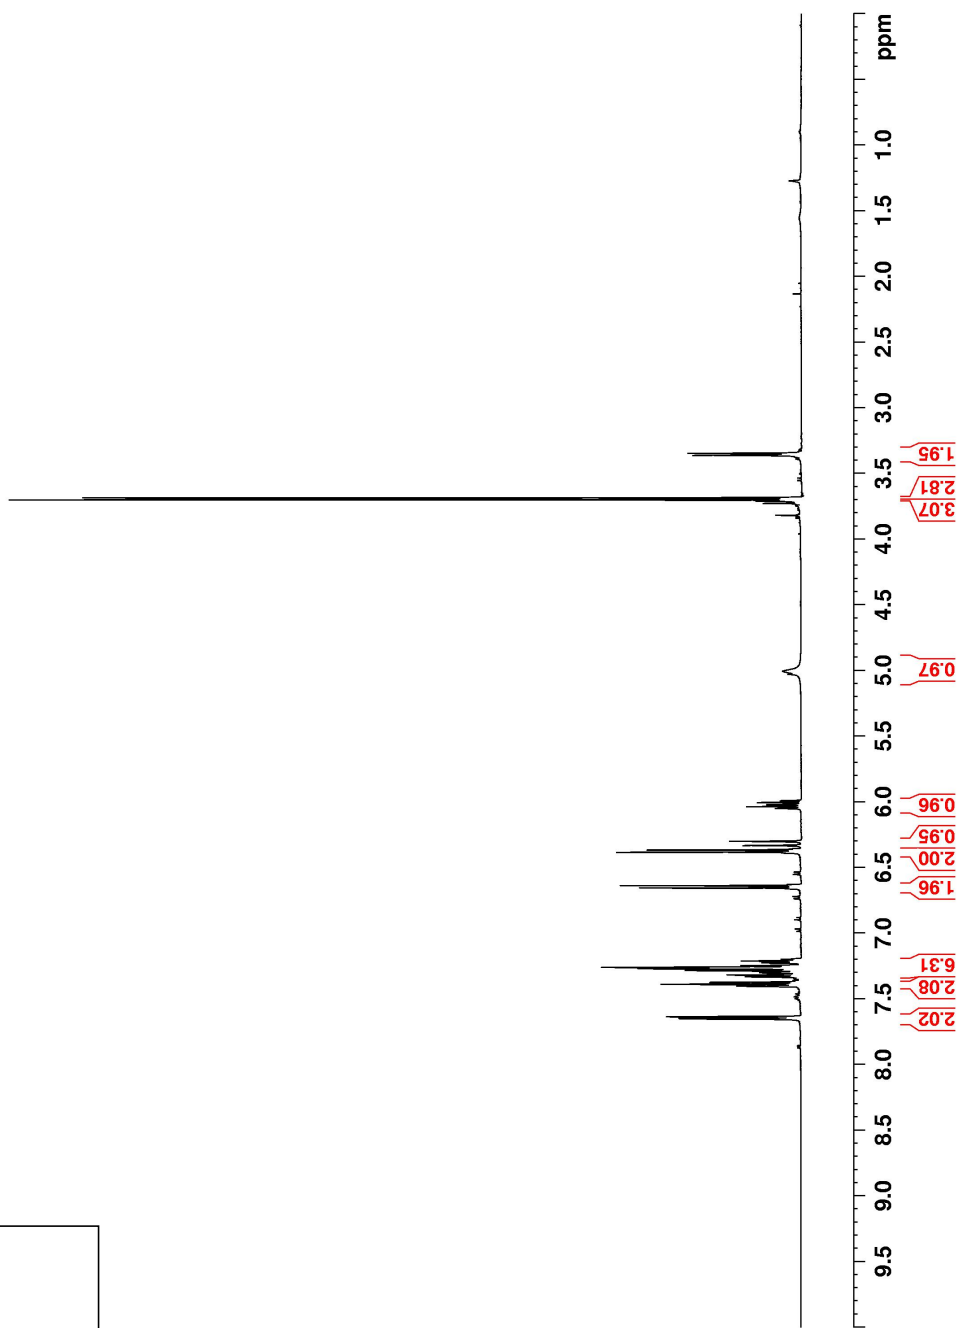

**Scheme 4.** 500 MHz <sup>1</sup>H NMR Spectrum of Compound 6 in CDCl<sub>3</sub>

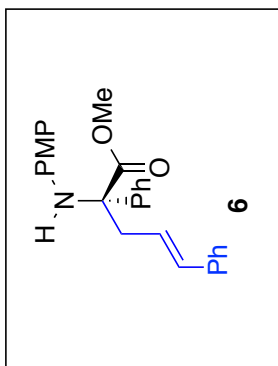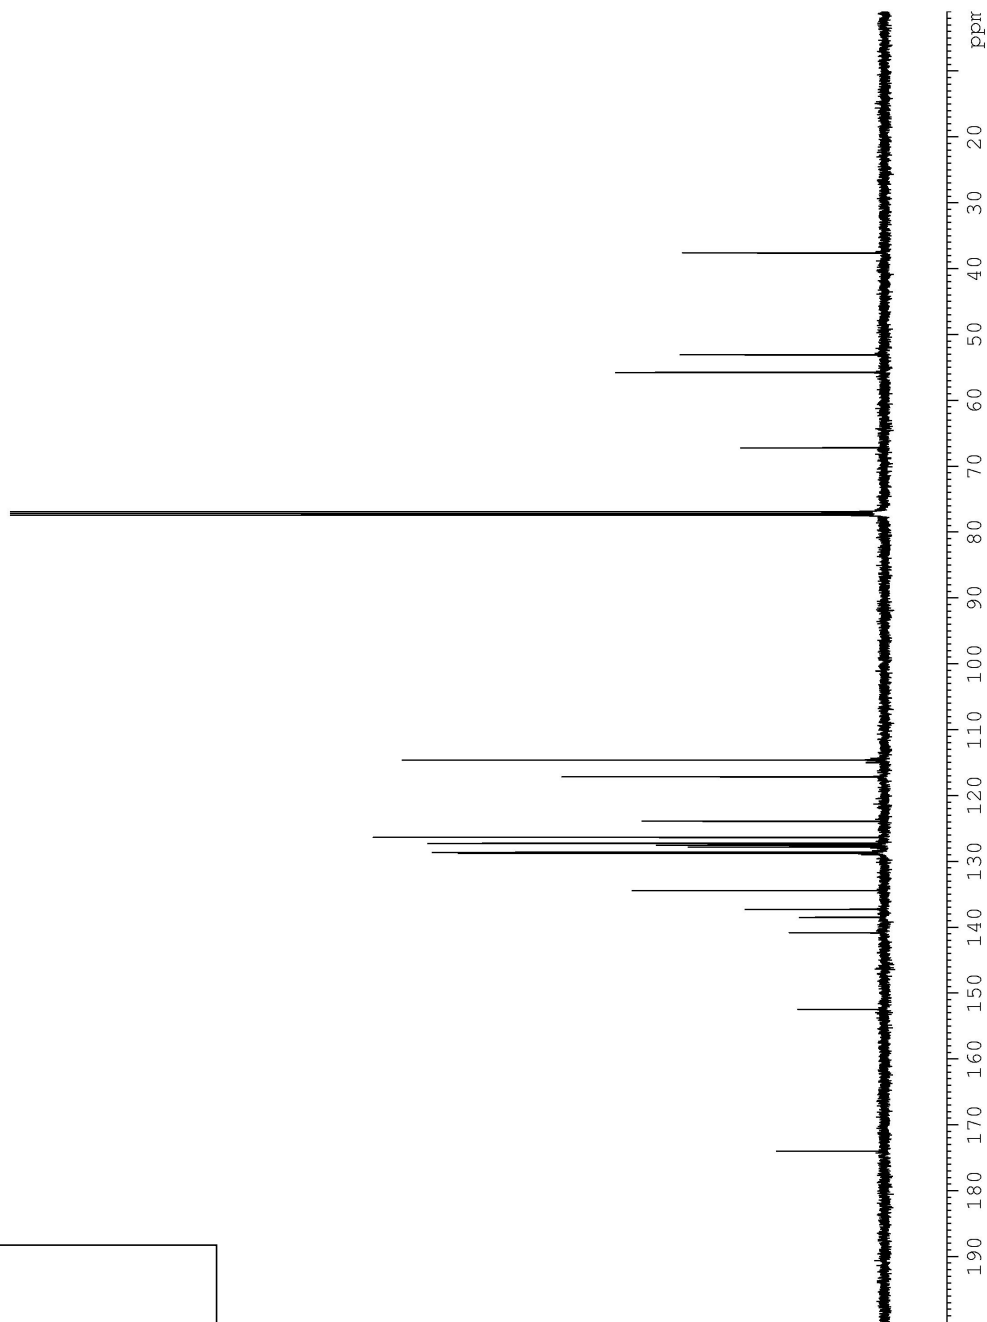

**Scheme 4.** 125 MHz <sup>13</sup>C NMR Spectrum of Compound 6 in CDCl<sub>3</sub>

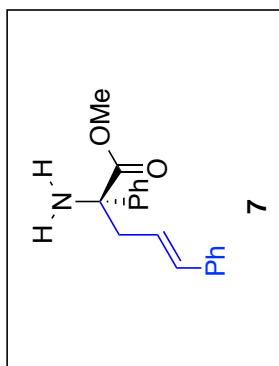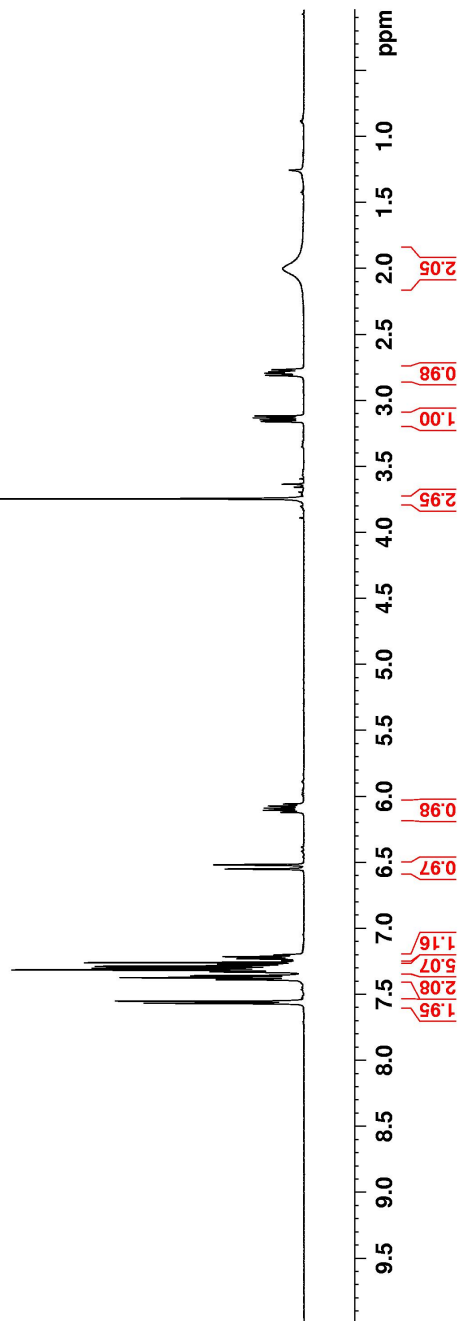

Scheme 4. 500 MHz <sup>1</sup>H NMR Spectrum of Compound 7 in CDCl<sub>3</sub>



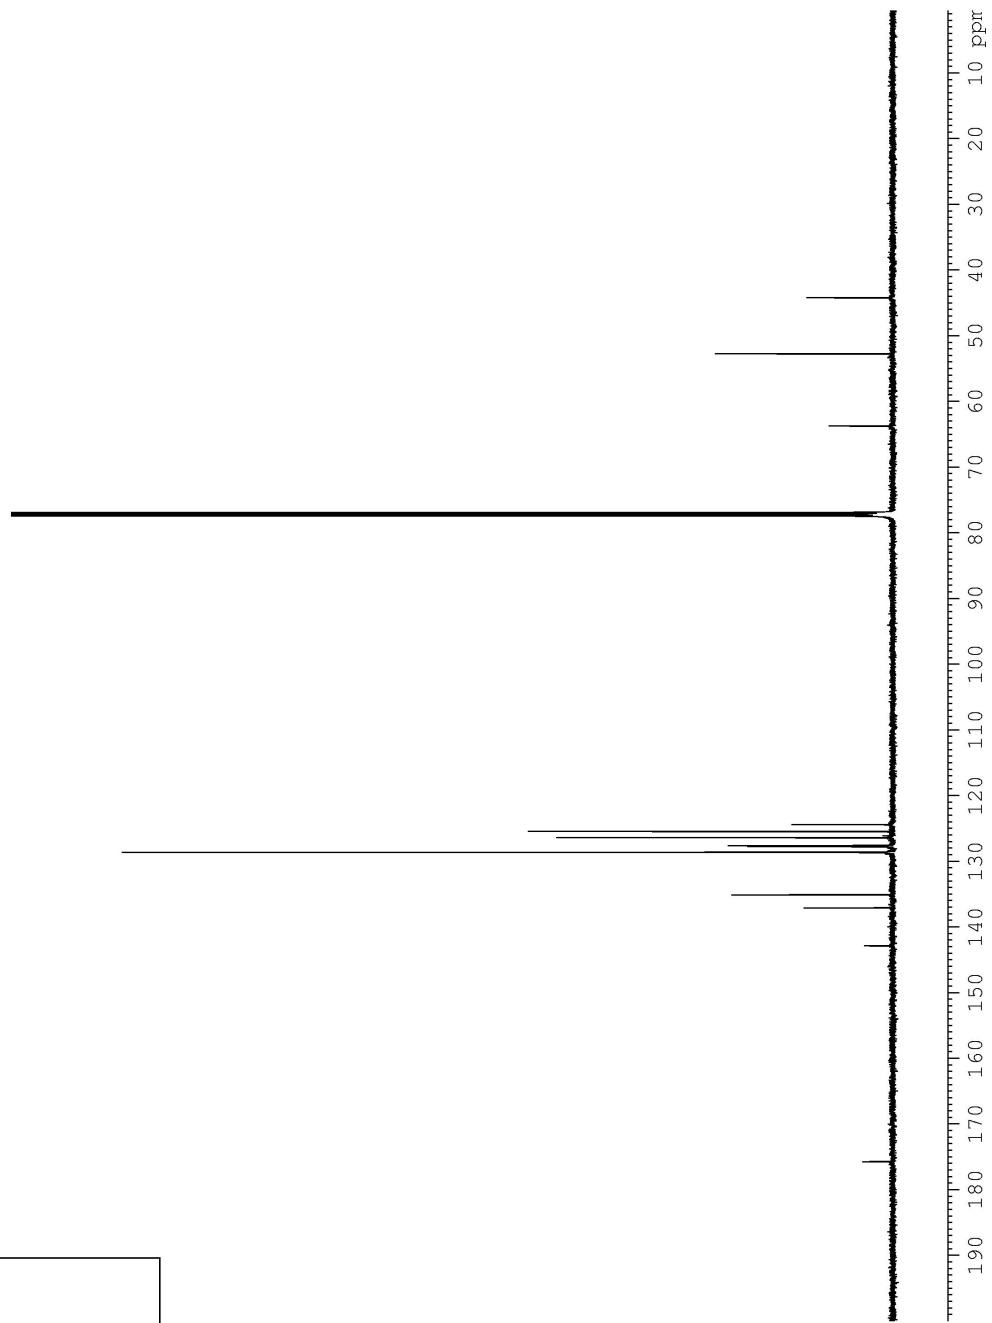

**Scheme 4.** 125 MHz <sup>13</sup>C NMR Spectrum of Compound 7 in CDCl<sub>3</sub>

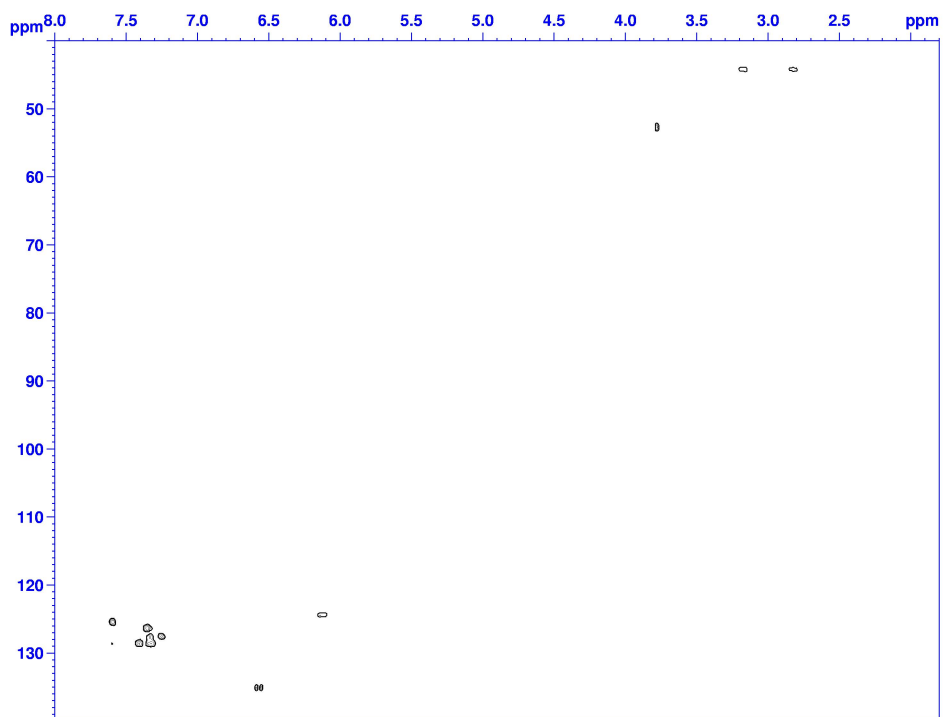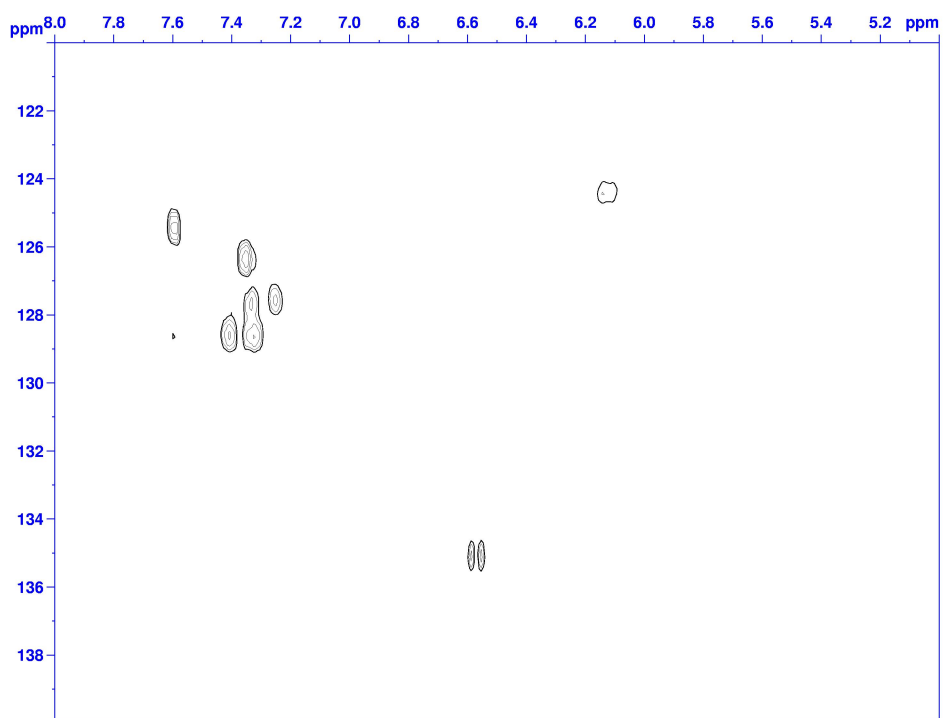

**Scheme 4.** 125 MHz HSQC Spectrum of Compound 7 in  $\text{CDCl}_3$

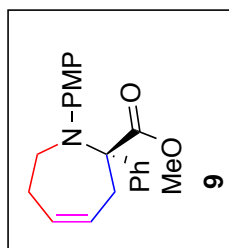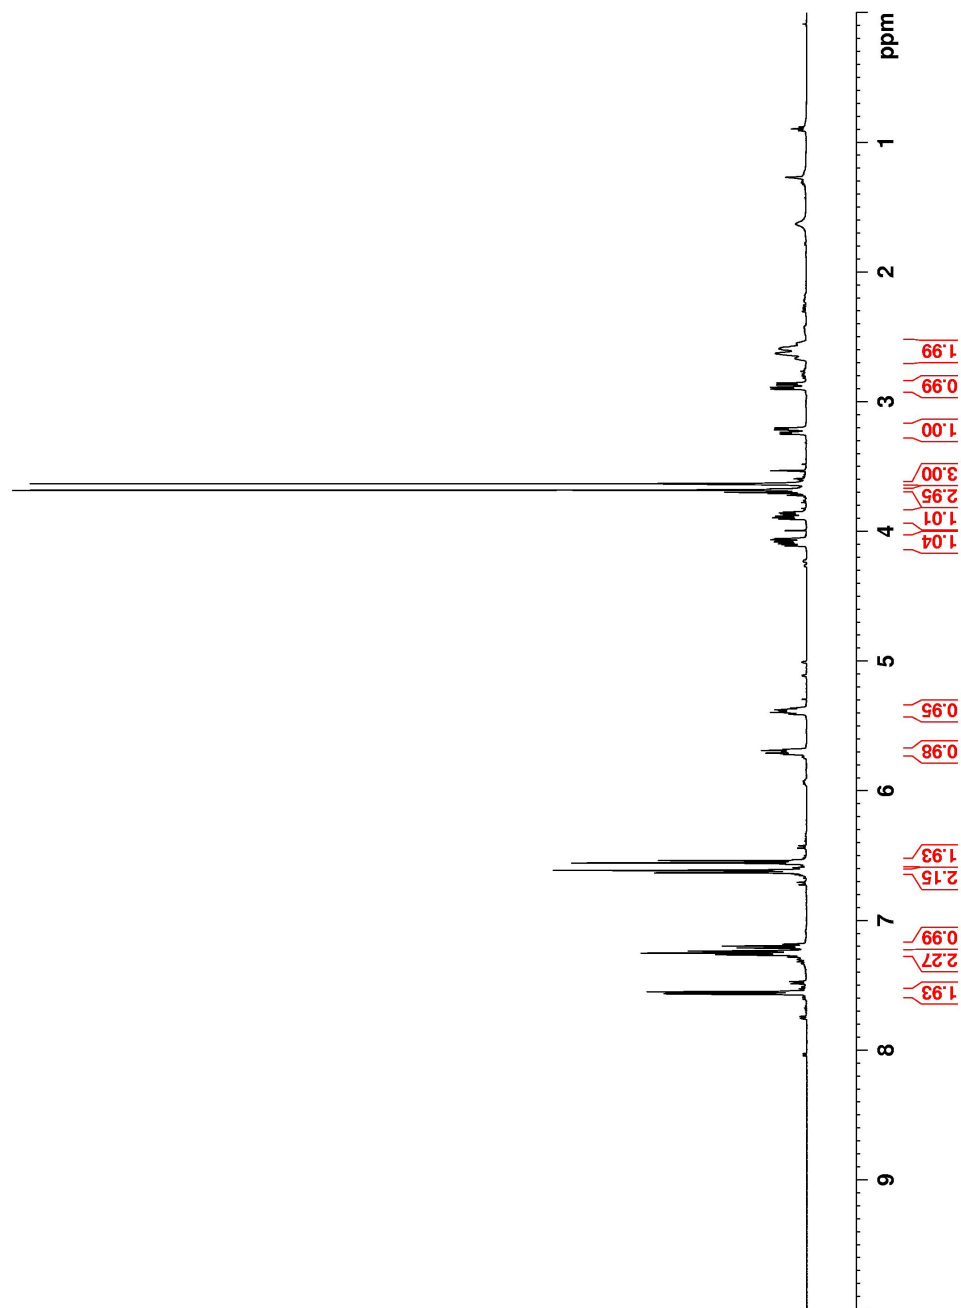

Scheme 5. 500 MHz <sup>1</sup>H NMR Spectrum of Compound 9 in CDCl<sub>3</sub>

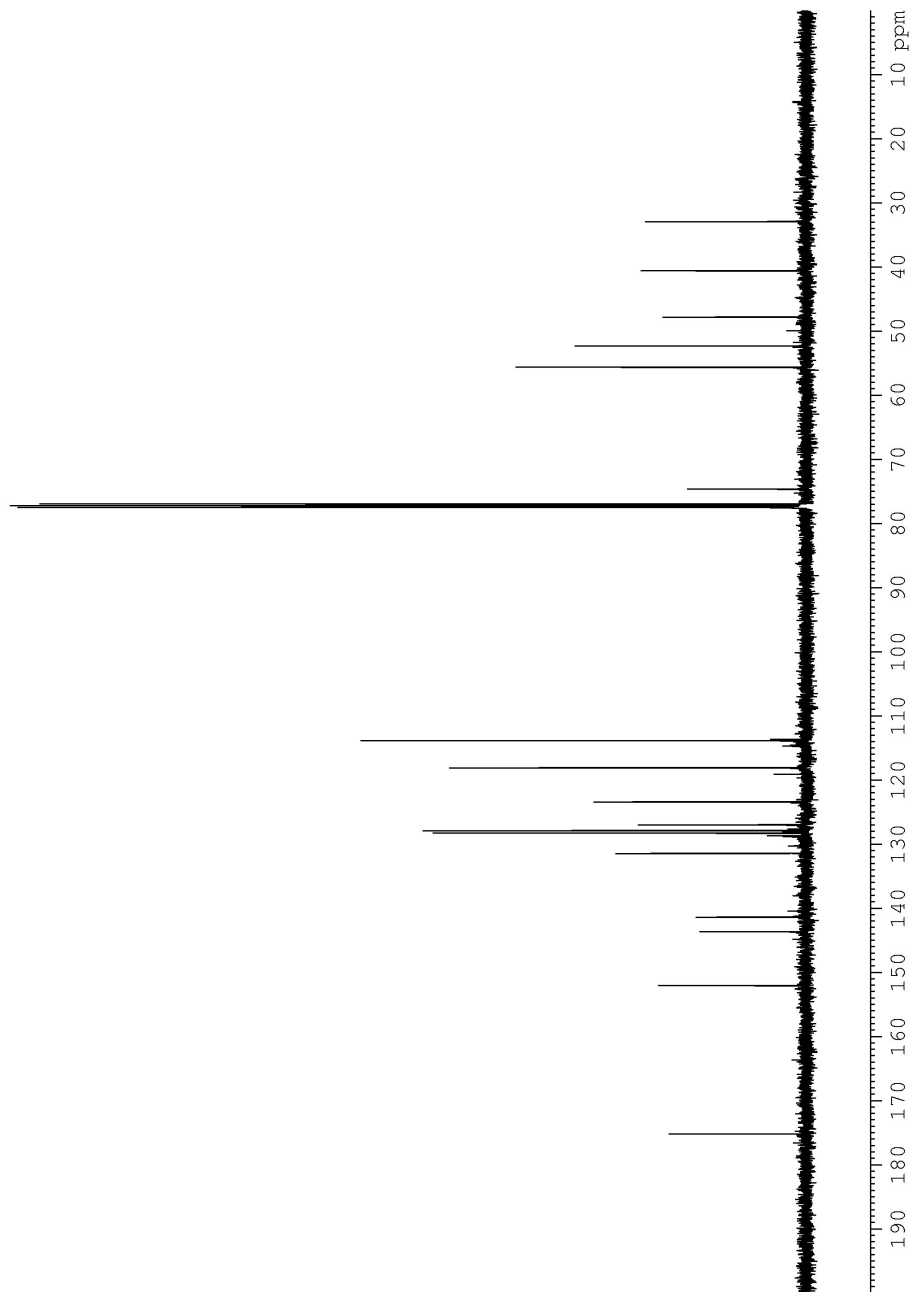

**Scheme 5.** 125 MHz  $^{13}\text{C}$  NMR Spectrum of Compound **9** in  $\text{CDCl}_3$

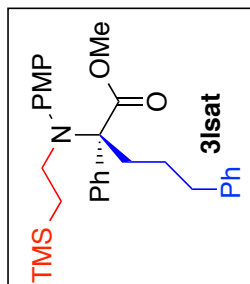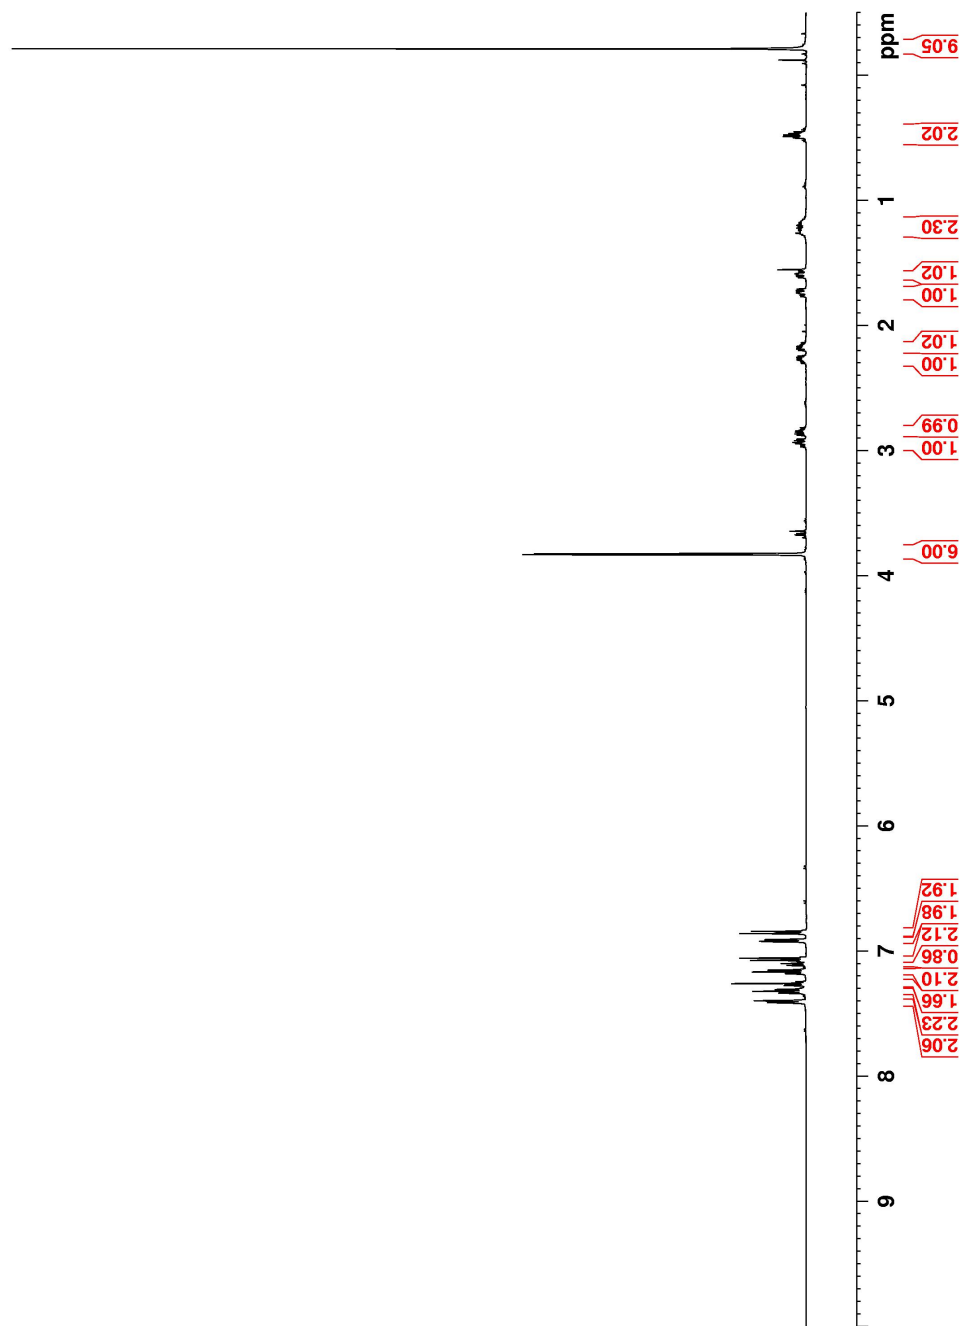

500 MHz  $^1\text{H}$  NMR Spectrum of Compound **31<sub>sat</sub>** in  $\text{CDCl}_3$

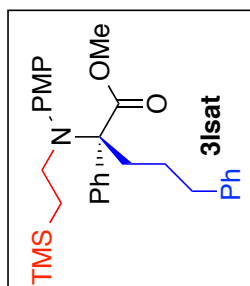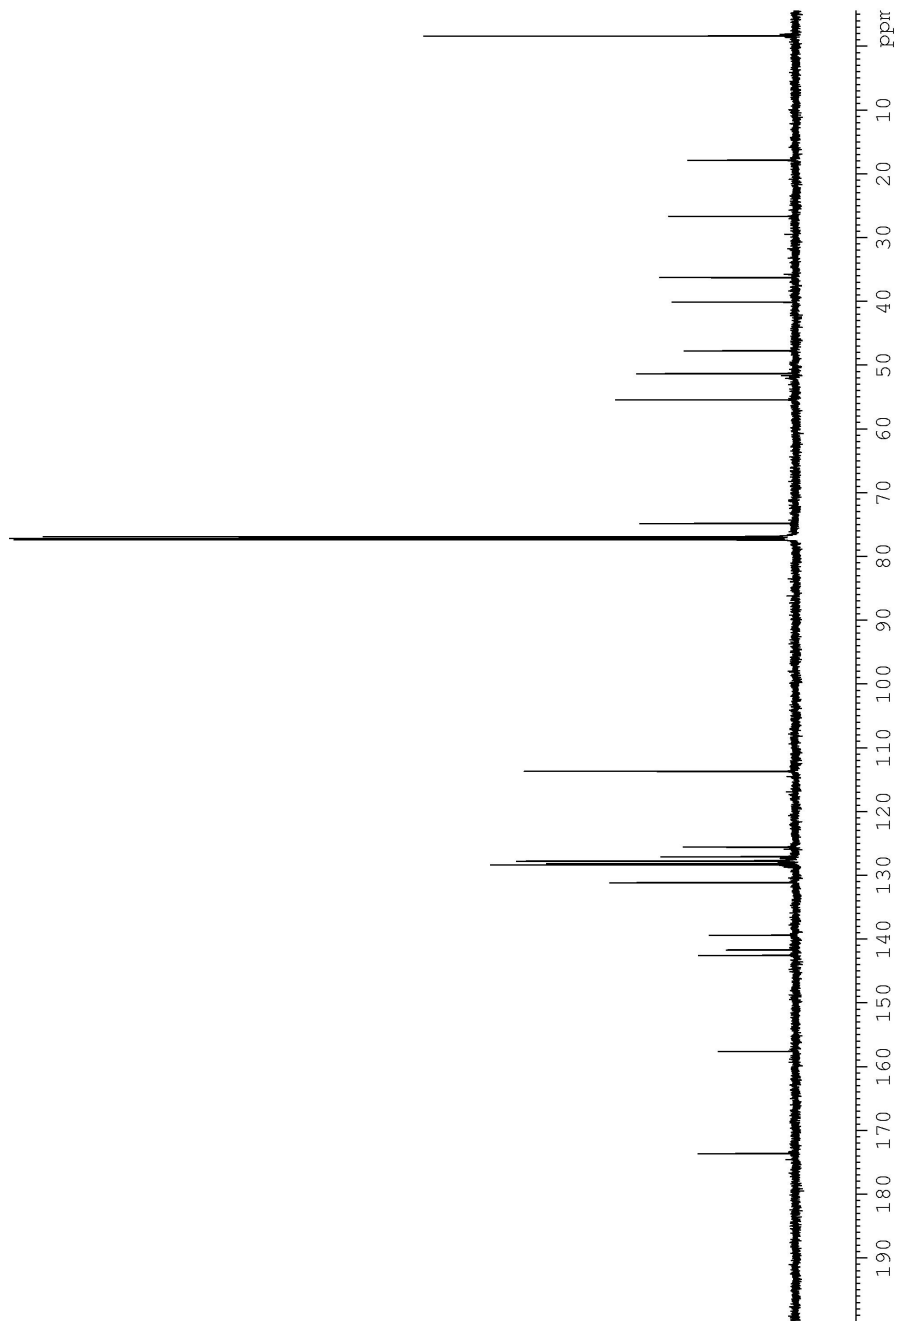

125 MHz  $^{13}\text{C}$  NMR Spectrum of Compound **3I<sub>sat</sub>** in  $\text{CDCl}_3$

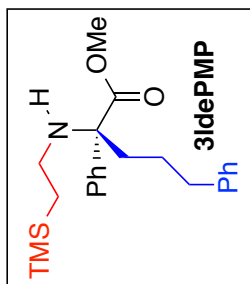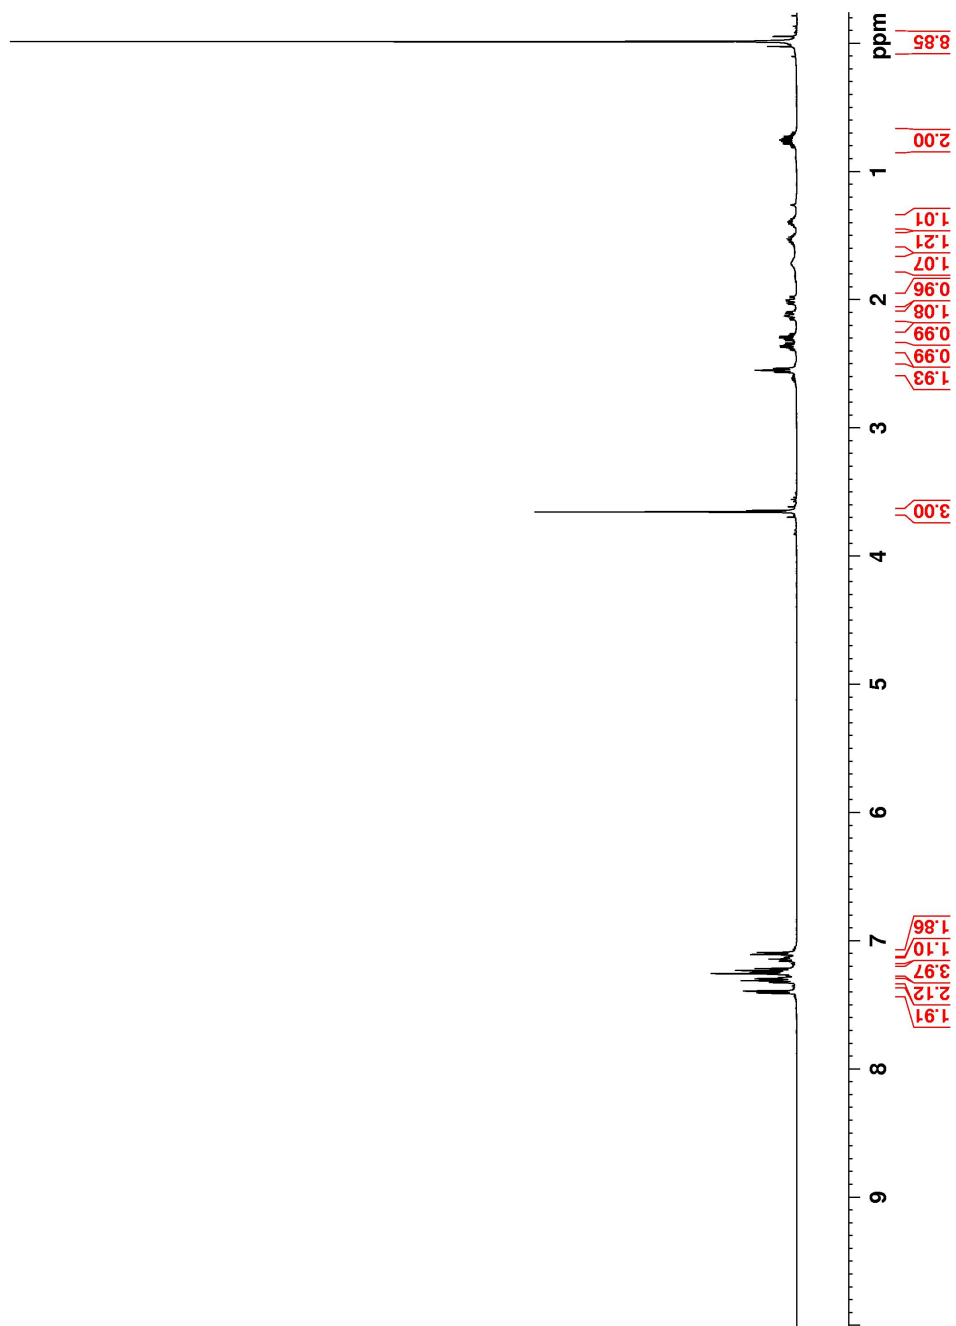

500 MHz <sup>1</sup>H NMR Spectrum of Compound **3IdePMP** in CDCl<sub>3</sub>

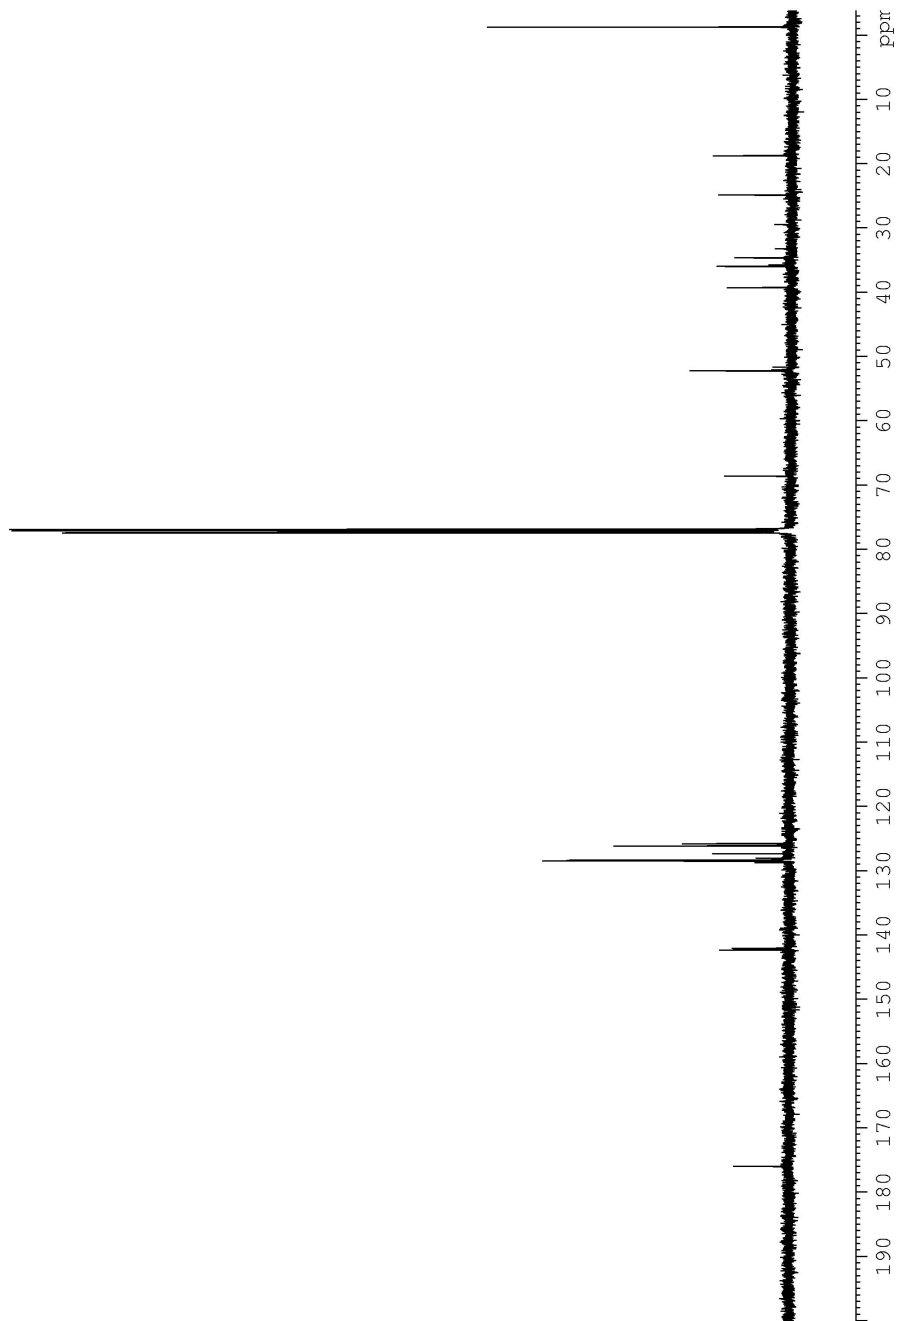

125 MHz  $^{13}\text{C}$  NMR Spectrum of Compound **3IdePMP** in  $\text{CDCl}_3$



# HPLC Chromatographs of Products 3a-3q

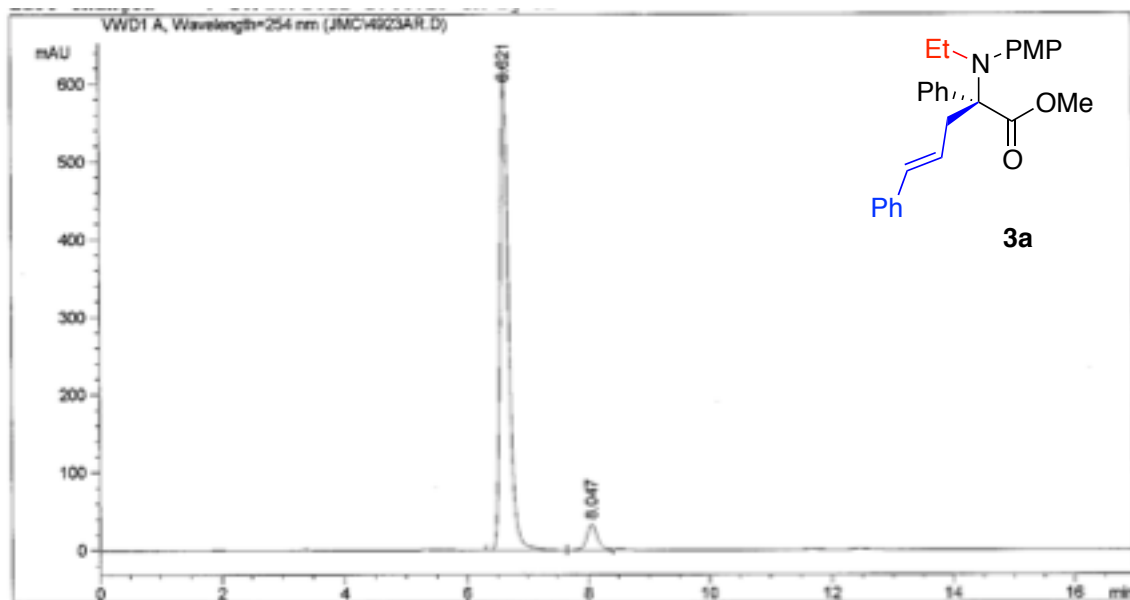

| Peak # | RetTime [min] | Type | Width [min] | Area mAU   | Area %  | Height [mAU] |
|--------|---------------|------|-------------|------------|---------|--------------|
| 1      | 6.621         | VV   | 0.1471      | 5976.35449 | 93.6448 | 621.60596    |
| 2      | 8.047         | VV   | 0.1825      | 405.58701  | 6.3552  | 33.38095     |

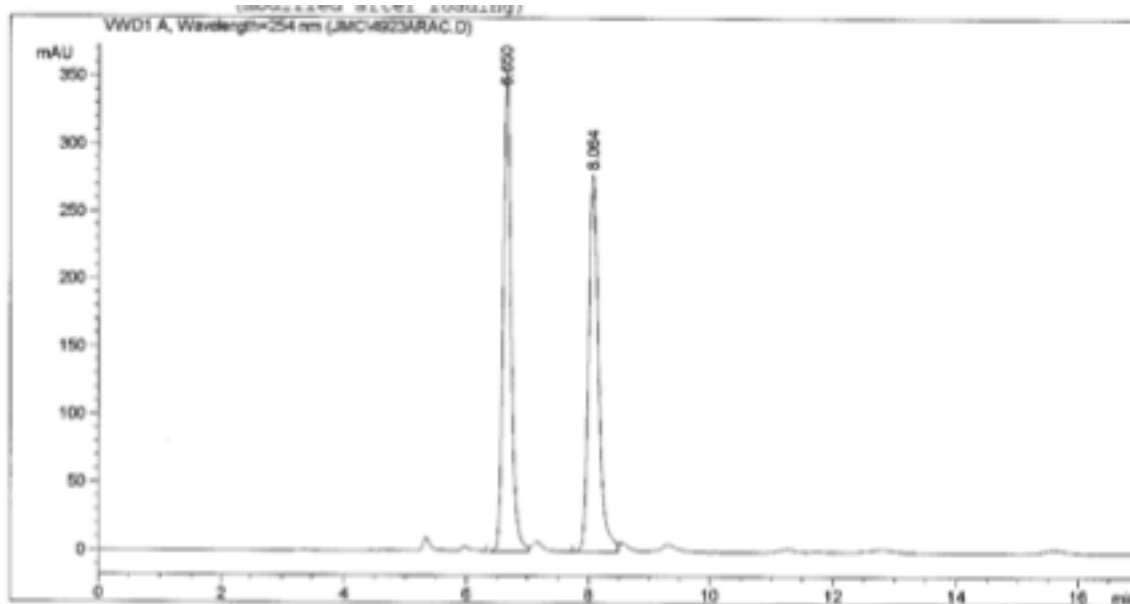

| Peak # | RetTime [min] | Type | Width [min] | Area mAU   | Area %  | Height [mAU] |
|--------|---------------|------|-------------|------------|---------|--------------|
| 1      | 6.650         | VV   | 0.1385      | 3241.94653 | 50.2807 | 355.08600    |
| 2      | 8.064         | VV   | 0.1751      | 3205.75415 | 49.7193 | 278.42767    |

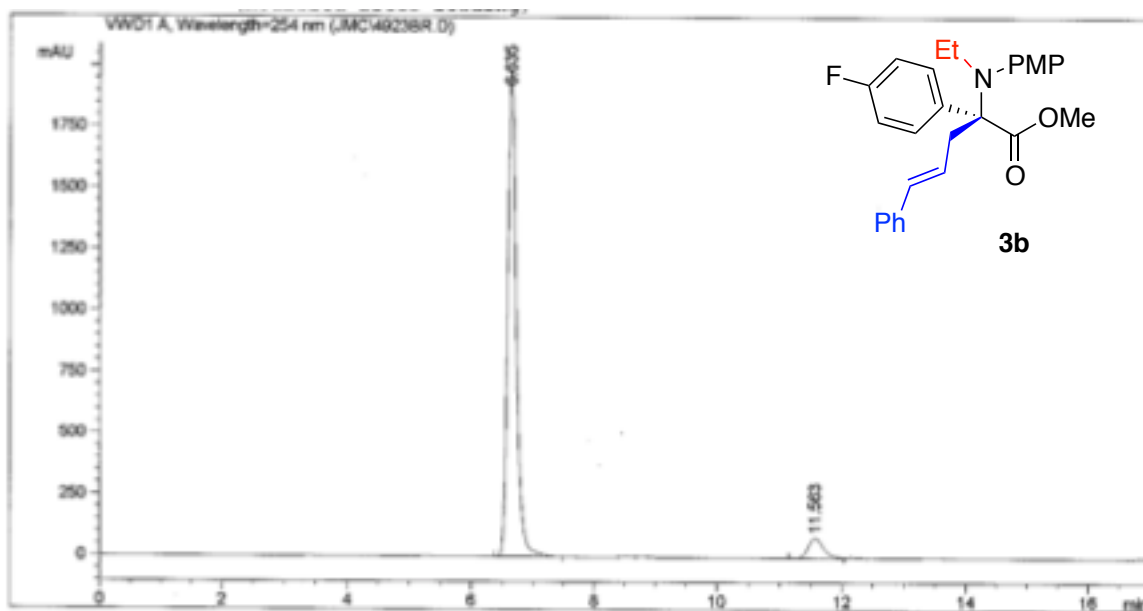

| Peak # | RetTime [min] | Type | Width [min] | Area mAU *s | Height [mAU] | Area %  |
|--------|---------------|------|-------------|-------------|--------------|---------|
| 1      | 6.635         | VV   | 0.1501      | 1.96298e4   | 1989.48999   | 93.2502 |
| 2      | 11.563        | VV   | 0.2626      | 1420.87073  | 82.26967     | 6.7498  |

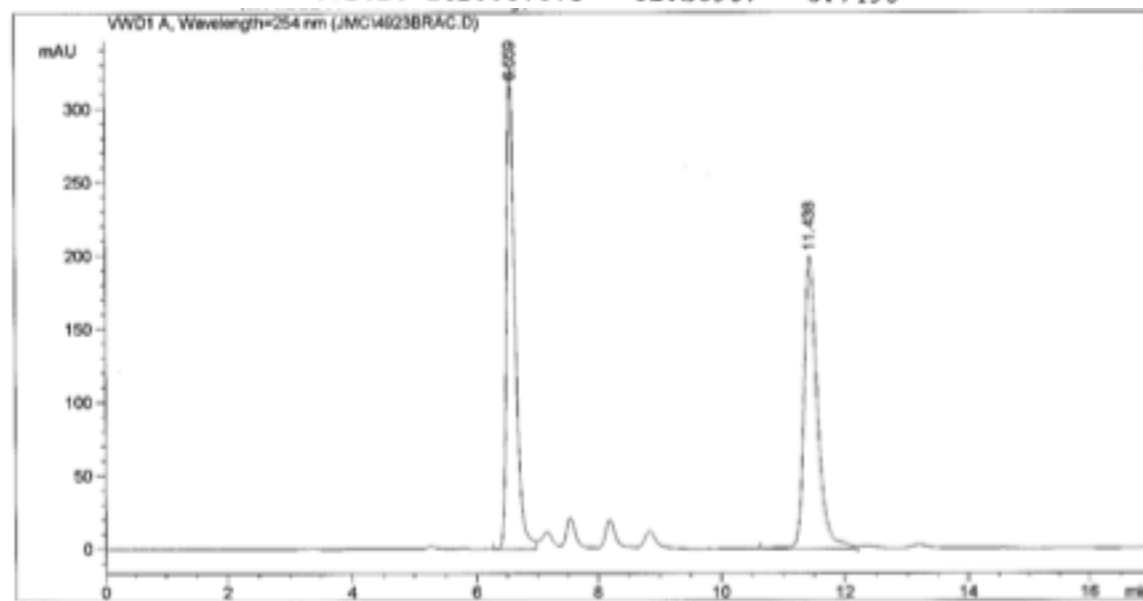

| Peak # | RetTime [min] | Type | Width [min] | Area mAU *s | Height [mAU] | Area %  |
|--------|---------------|------|-------------|-------------|--------------|---------|
| 1      | 6.559         | VV   | 0.1459      | 3217.70361  | 329.70172    | 51.0629 |
| 2      | 11.438        | VV   | 0.2328      | 3083.74341  | 199.46837    | 48.9371 |

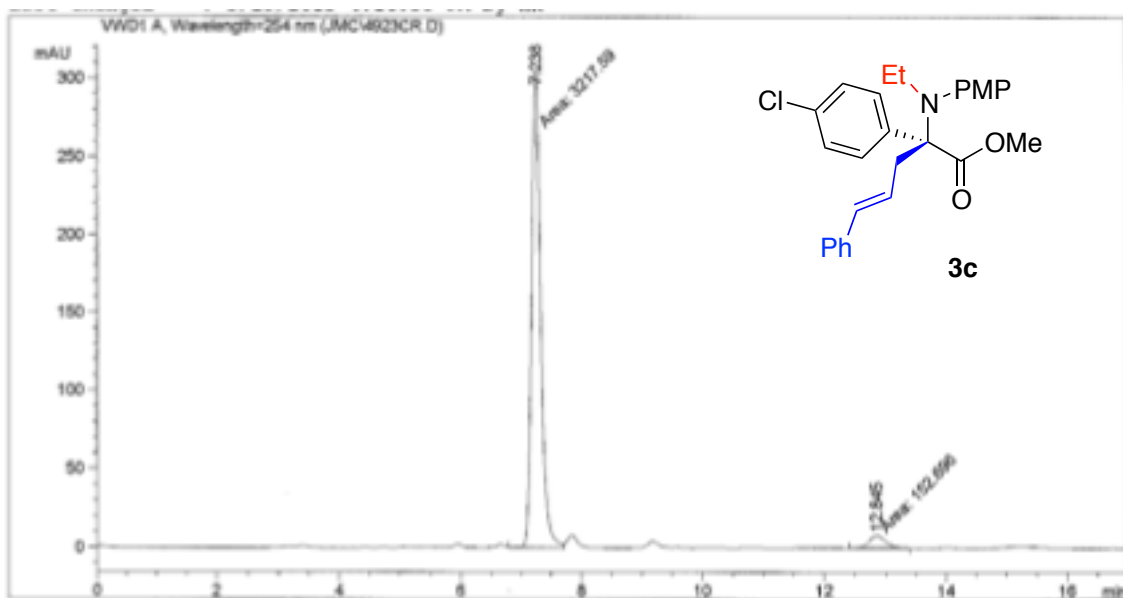

| Peak # | RetTime [min] | Type | Width [min] | Area mAU   | Area %  | Height [mAU] |
|--------|---------------|------|-------------|------------|---------|--------------|
| 1      | 7.238         | MF   | 0.1749      | 3217.59375 | 95.4694 | 306.66895    |
| 2      | 12.845        | MM   | 0.3231      | 152.69572  | 4.5306  | 7.87607      |

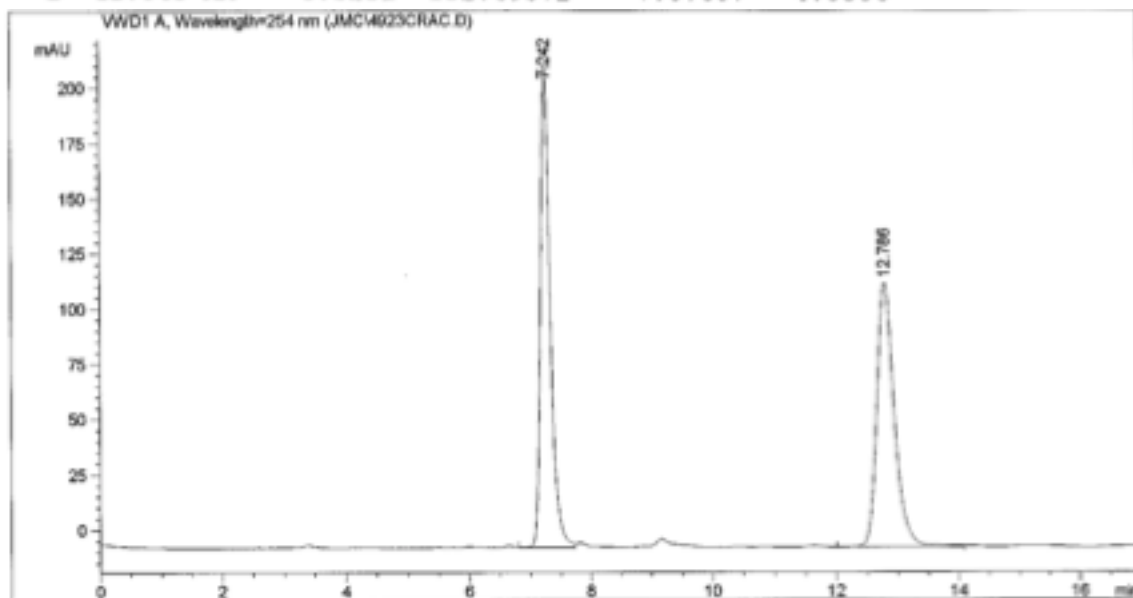

| Peak # | RetTime [min] | Type | Width [min] | Area mAU   | Area %  | Height [mAU] |
|--------|---------------|------|-------------|------------|---------|--------------|
| 1      | 7.242         | VV   | 0.1665      | 2416.30688 | 50.6319 | 219.06432    |
| 2      | 12.786        | VV   | 0.2971      | 2355.99194 | 49.3681 | 119.45978    |

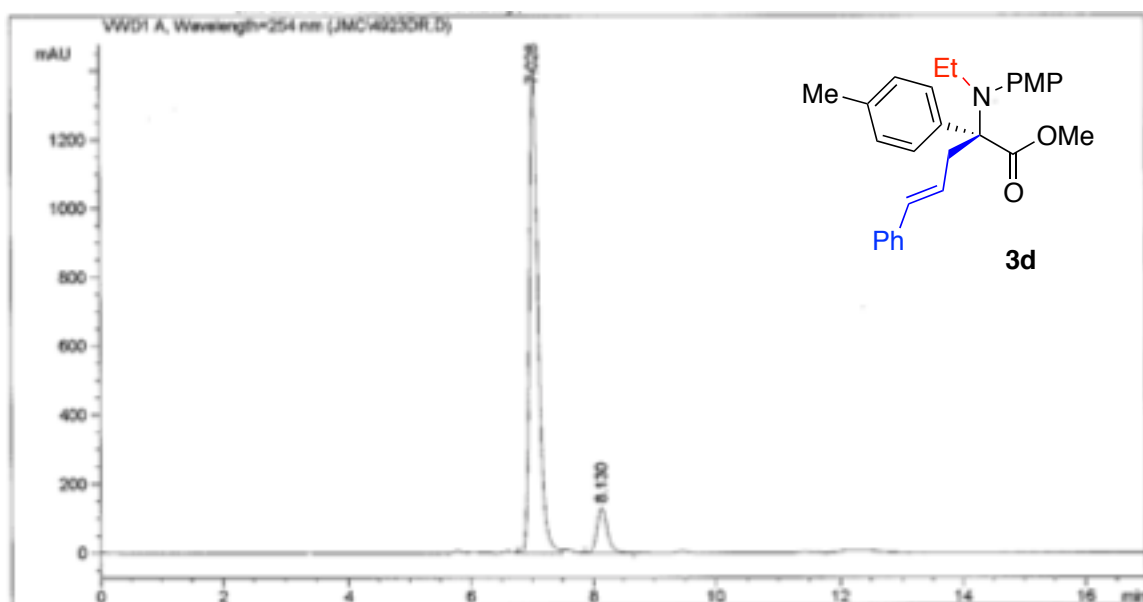

| Peak # | RetTime [min] | Type | Width [min] | Area mAU   | Area *s | Height [mAU] | Area %  |
|--------|---------------|------|-------------|------------|---------|--------------|---------|
| 1      | 7.028         | VV   | 0.1504      | 1.39221e4  |         | 1406.51208   | 89.5701 |
| 2      | 8.130         | VV   | 0.1878      | 1621.14404 |         | 131.21811    | 10.4299 |

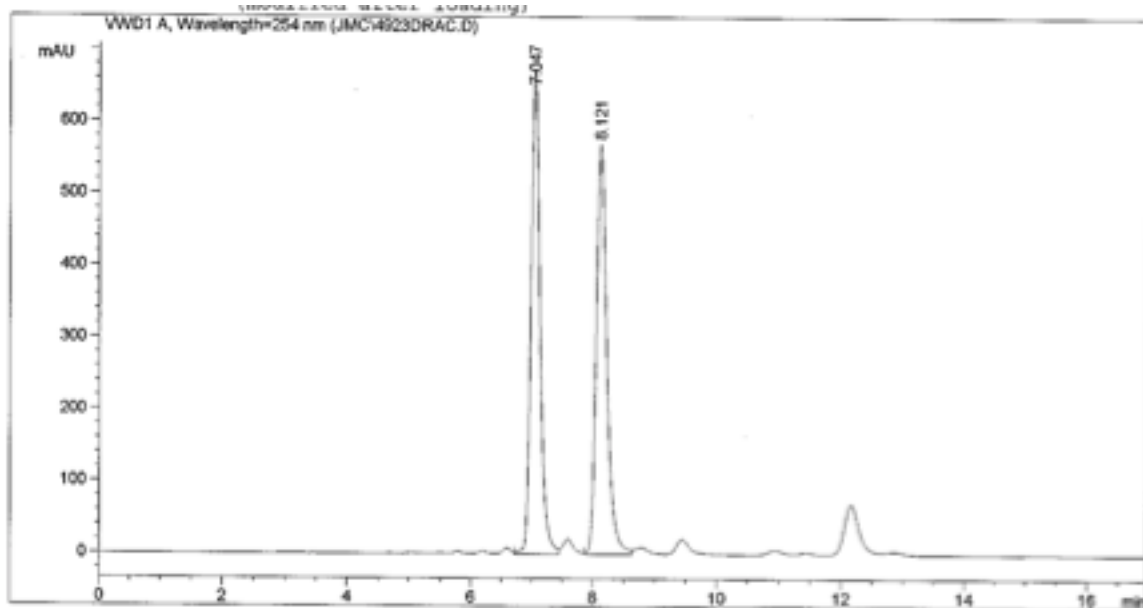

| Peak # | RetTime [min] | Type | Width [min] | Area mAU   | Area *s | Height [mAU] | Area %  |
|--------|---------------|------|-------------|------------|---------|--------------|---------|
| 1      | 7.047         | VV   | 0.1541      | 6874.57422 |         | 672.96912    | 49.9173 |
| 2      | 8.121         | VV   | 0.1822      | 6897.35107 |         | 568.98853    | 50.0827 |

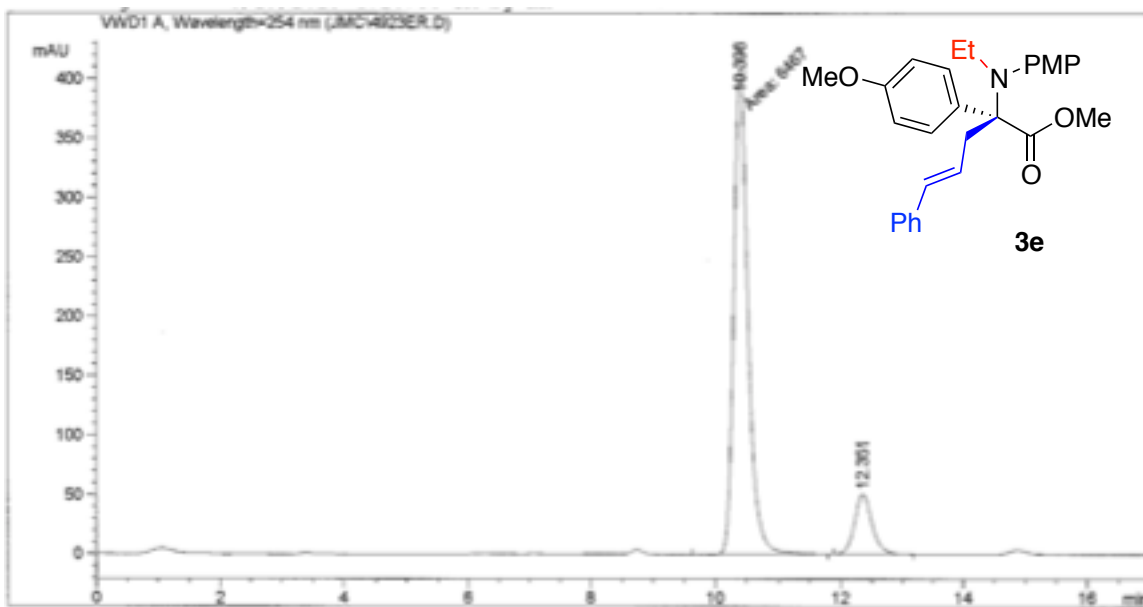

| Peak # | RetTime [min] | Type | Width [min] | Area mAU   | Area %  | Height [mAU] |
|--------|---------------|------|-------------|------------|---------|--------------|
| 1      | 10.398        | MM   | 0.2622      | 6467.00488 | 86.6428 | 411.06500    |
| 2      | 12.351        | BB   | 0.2958      | 996.97931  | 13.3572 | 50.82684     |

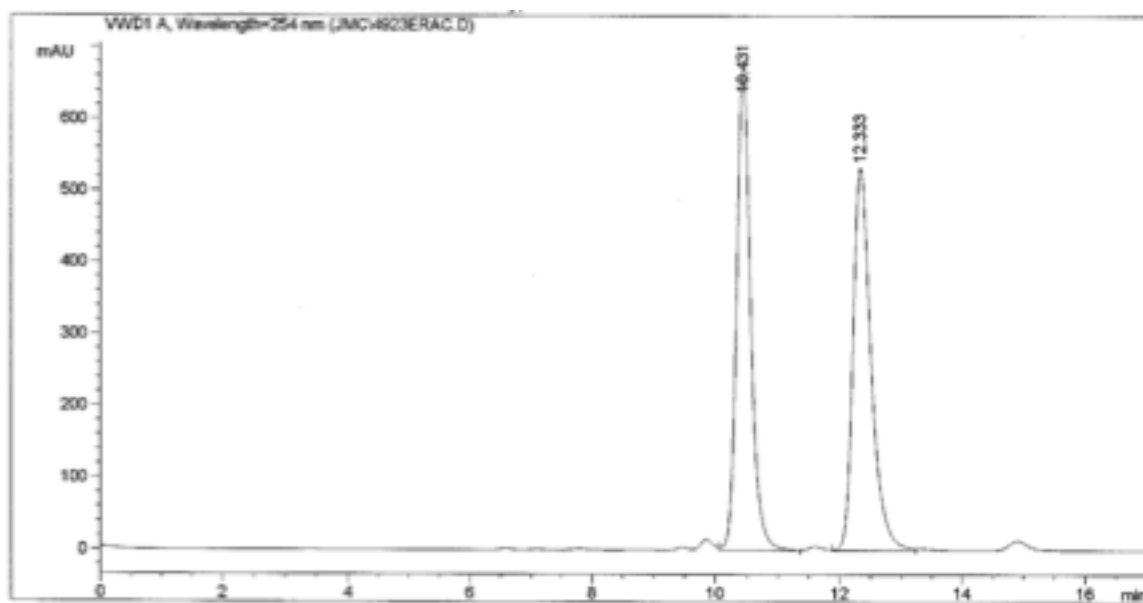

| Peak # | RetTime [min] | Type | Width [min] | Area mAU  | Area %  | Height [mAU] |
|--------|---------------|------|-------------|-----------|---------|--------------|
| 1      | 10.431        | VV   | 0.2378      | 1.05023e4 | 49.5800 | 671.65704    |
| 2      | 12.333        | VV   | 0.3037      | 1.06802e4 | 50.4200 | 532.92847    |

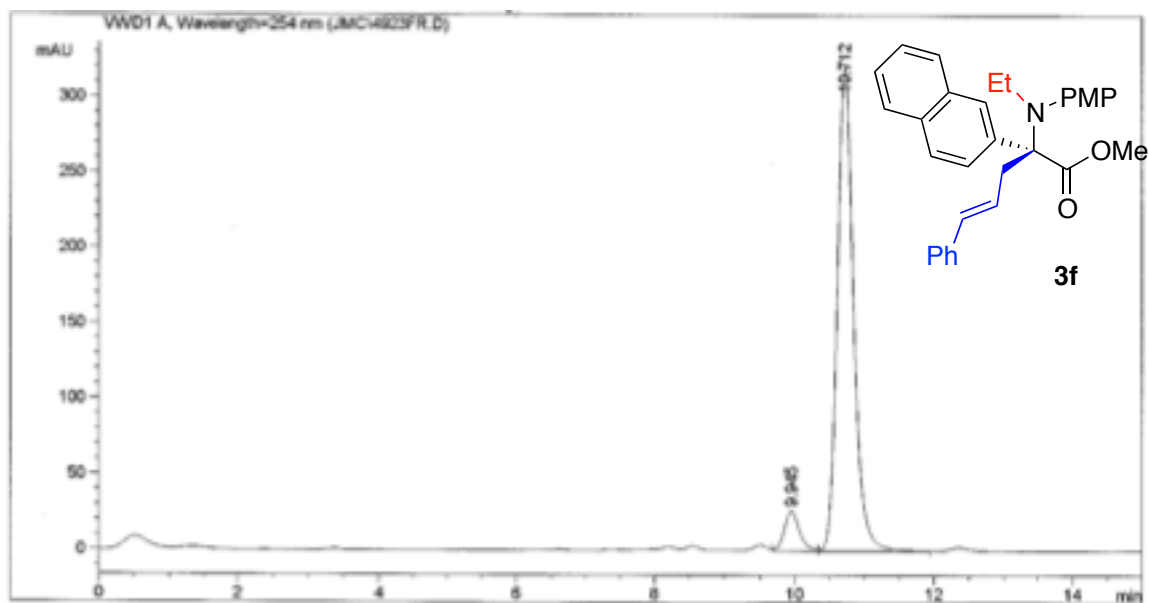

| Peak # | RetTime [min] | Type | Width [min] | Area mAU*s | Height [mAU] | Area %  |
|--------|---------------|------|-------------|------------|--------------|---------|
| 1      | 9.945         | VV   | 0.2324      | 397.46729  | 26.18261     | 7.1382  |
| 2      | 10.712        | VV   | 0.2468      | 5170.67871 | 319.90131    | 92.8618 |

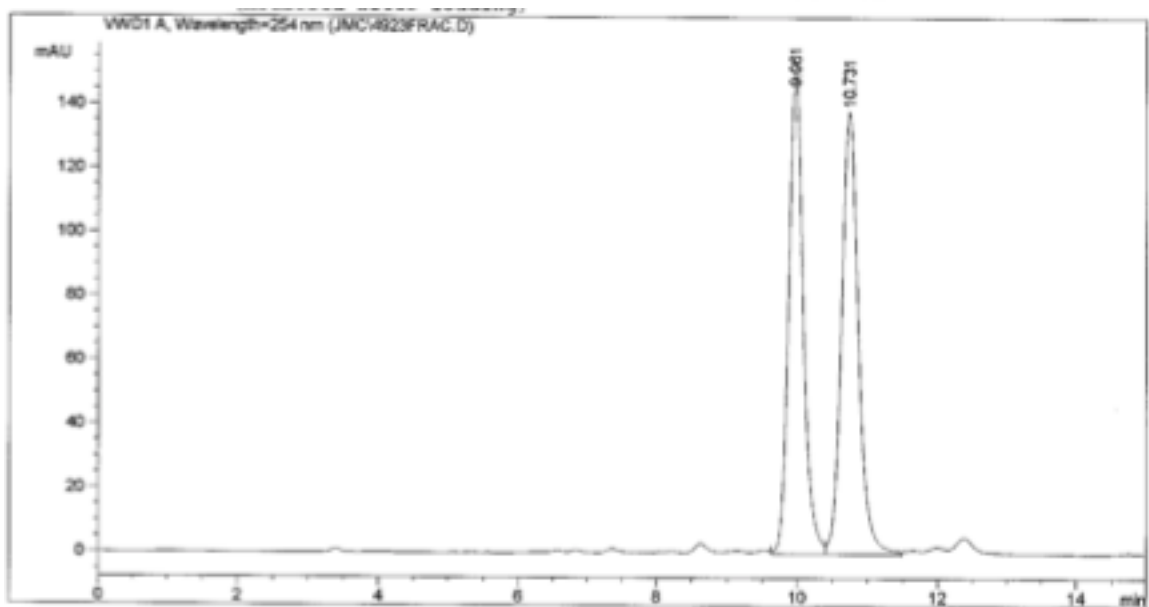

| Peak # | RetTime [min] | Type | Width [min] | Area mAU*s | Height [mAU] | Area %  |
|--------|---------------|------|-------------|------------|--------------|---------|
| 1      | 9.961         | VV   | 0.2217      | 2194.38525 | 151.25722    | 48.7568 |
| 2      | 10.731        | VV   | 0.2559      | 2306.28613 | 138.18172    | 51.2432 |

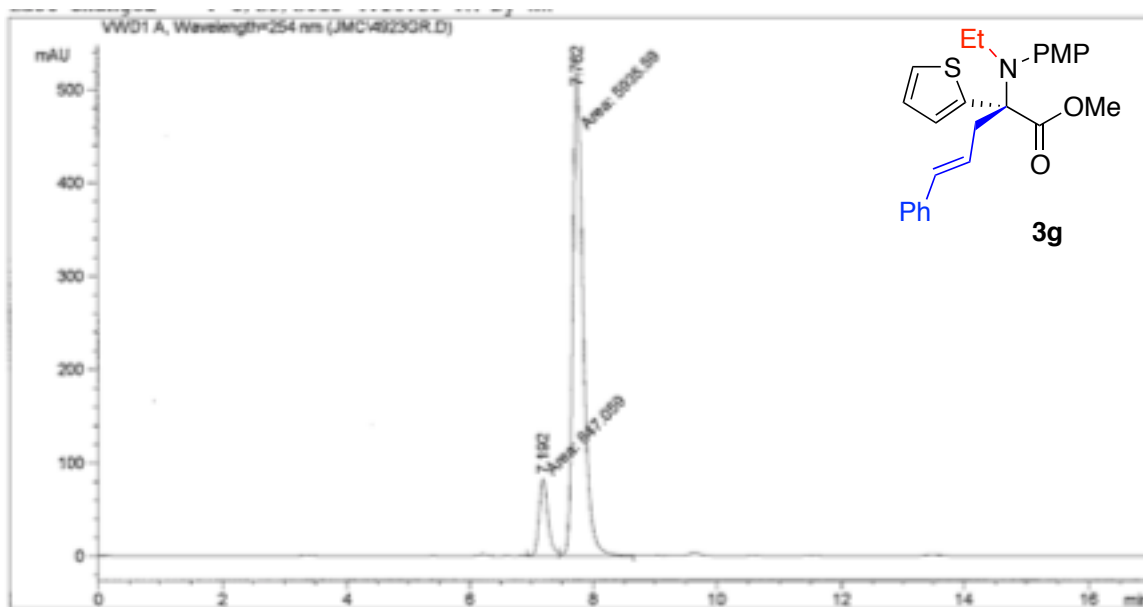

| Peak # | RetTime [min] | Type | Width [min] | Area mAU   | Area *s | Height [mAU] | Area %  |
|--------|---------------|------|-------------|------------|---------|--------------|---------|
| 1      | 7.192         | MF   | 0.1691      | 847.05865  |         | 83.46306     | 12.4886 |
| 2      | 7.762         | FM   | 0.1896      | 5935.58594 |         | 521.82330    | 87.5114 |

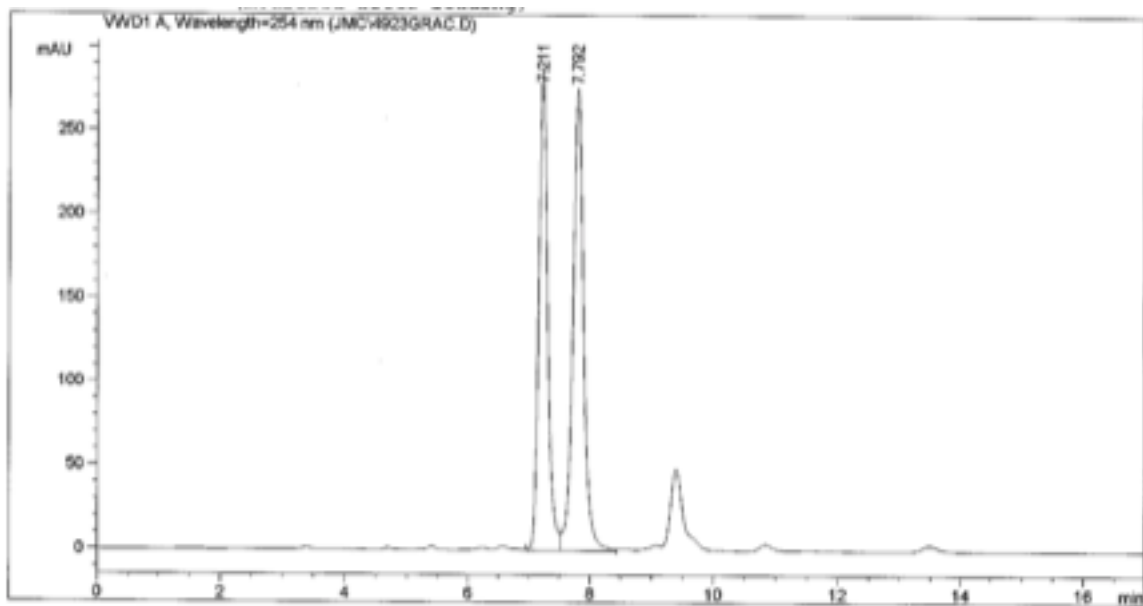

| Peak # | RetTime [min] | Type | Width [min] | Area mAU   | Area *s | Height [mAU] | Area %  |
|--------|---------------|------|-------------|------------|---------|--------------|---------|
| 1      | 7.211         | VV   | 0.1553      | 2979.05103 |         | 288.74097    | 47.3708 |
| 2      | 7.792         | VV   | 0.1807      | 3309.73682 |         | 275.88364    | 52.6292 |

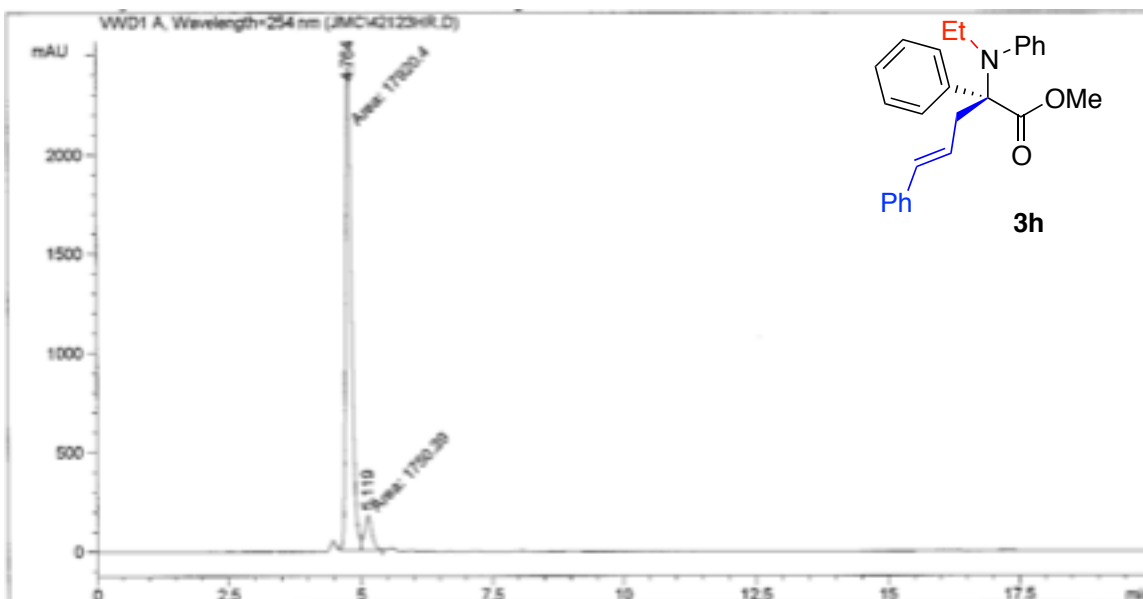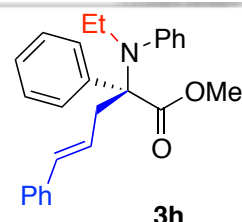

| Peak # | RetTime [min] | Type | Width [min] | Area mAU   | *s | Height [mAU] | Area %  |
|--------|---------------|------|-------------|------------|----|--------------|---------|
| 1      | 4.764         | MF   | 0.1222      | 1.79204e4  |    | 2443.26367   | 91.1016 |
| 2      | 5.119         | FM   | 0.1642      | 1750.38867 |    | 177.63388    | 8.8984  |

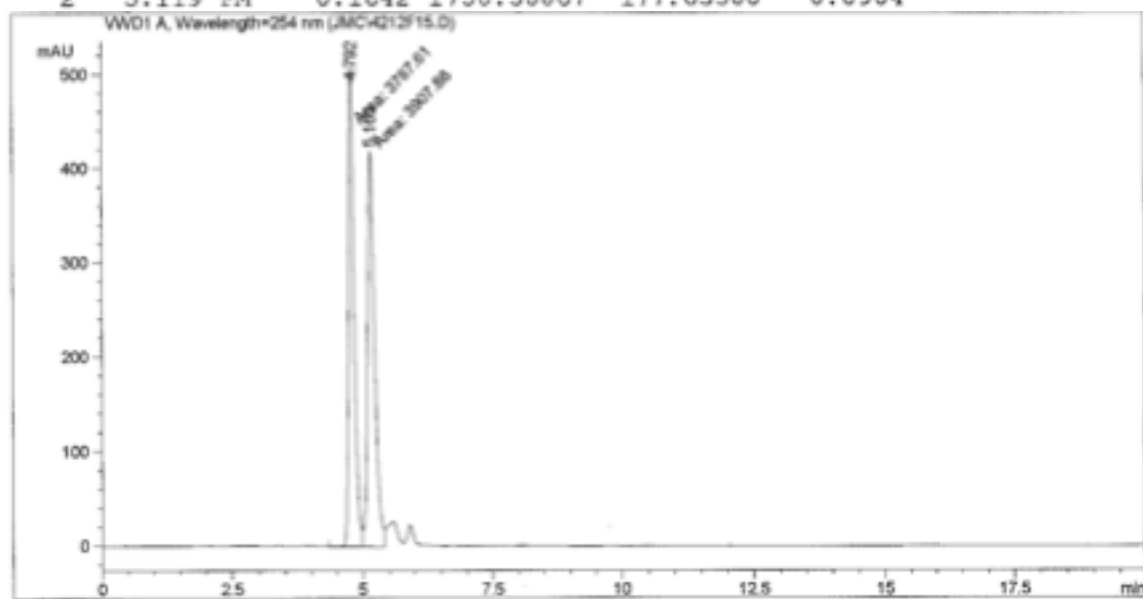

| Peak # | RetTime [min] | Type | Width [min] | Area mAU   | *s | Height [mAU] | Area %  |
|--------|---------------|------|-------------|------------|----|--------------|---------|
| 1      | 4.792         | MF   | 0.1235      | 3787.60913 |    | 511.08856    | 49.2186 |
| 2      | 5.165         | MF   | 0.1555      | 3907.88037 |    | 418.90485    | 50.7814 |



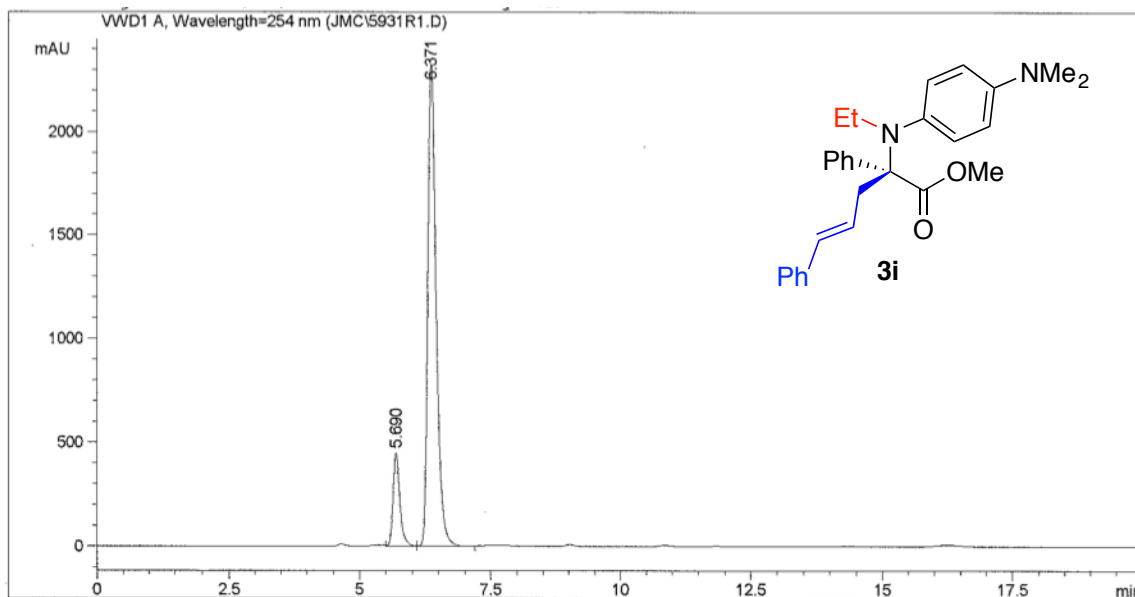

| Peak # | RetTime [min] | Type | Width [min] | Area mAU   | Area *s | Height [mAU] | Area %  |
|--------|---------------|------|-------------|------------|---------|--------------|---------|
| 1      | 5.690         | VV   | 0.1335      | 3961.77930 |         | 448.95929    | 13.4362 |
| 2      | 6.371         | VV   | 0.1658      | 2.55241e4  |         | 2327.74609   | 86.5638 |

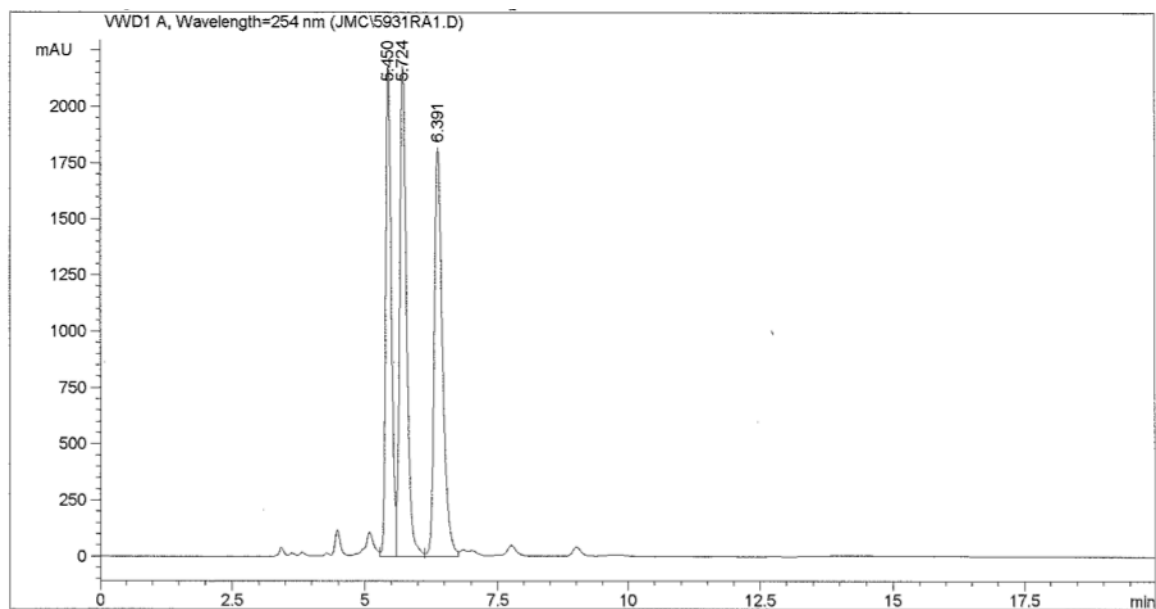

| Peak # | RetTime [min] | Type | Width [min] | Area mAU  | Area *s | Height [mAU] | Area %  |
|--------|---------------|------|-------------|-----------|---------|--------------|---------|
| 1      | 5.450         | VV   | 0.1139      | 1.61563e4 |         | 2184.89258   | 29.2162 |
| 2      | 5.724         | VV   | 0.1366      | 1.95502e4 |         | 2181.27148   | 35.3536 |
| 3      | 6.391         | VV   | 0.1634      | 1.95926e4 |         | 1820.32642   | 35.4302 |

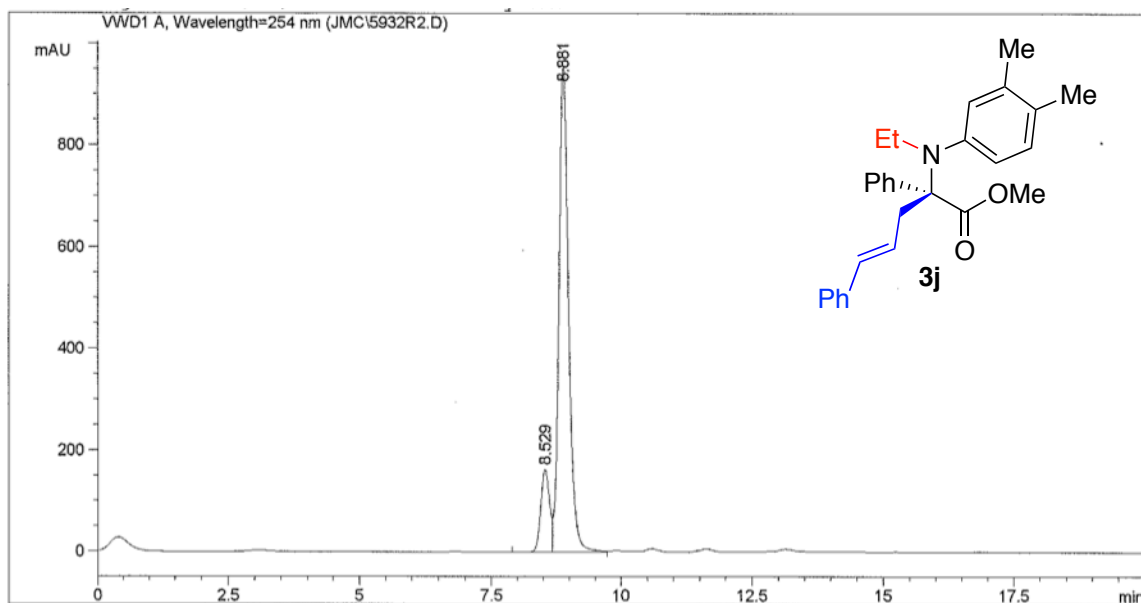

| Peak # | RetTime [min] | Type | Width [min] | Area mAU *s | Height [mAU] | Area %  |
|--------|---------------|------|-------------|-------------|--------------|---------|
| 1      | 8.529         | VV   | 0.1804      | 1916.47498  | 163.50797    | 13.4865 |
| 2      | 8.881         | VV   | 0.1936      | 1.22938e4   | 956.88660    | 86.5135 |

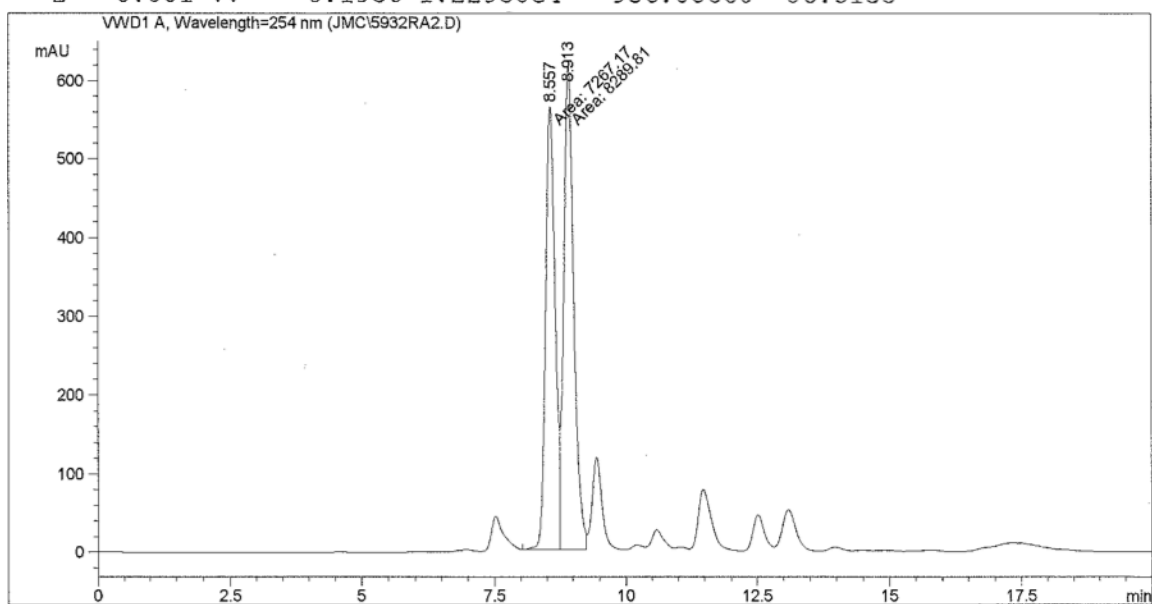

| Peak # | RetTime [min] | Type | Width [min] | Area mAU *s | Height [mAU] | Area %  |
|--------|---------------|------|-------------|-------------|--------------|---------|
| 1      | 8.557         | MF   | 0.2149      | 7267.17090  | 563.56427    | 46.7133 |
| 2      | 8.913         | MF   | 0.2242      | 8289.80762  | 616.21008    | 53.2867 |

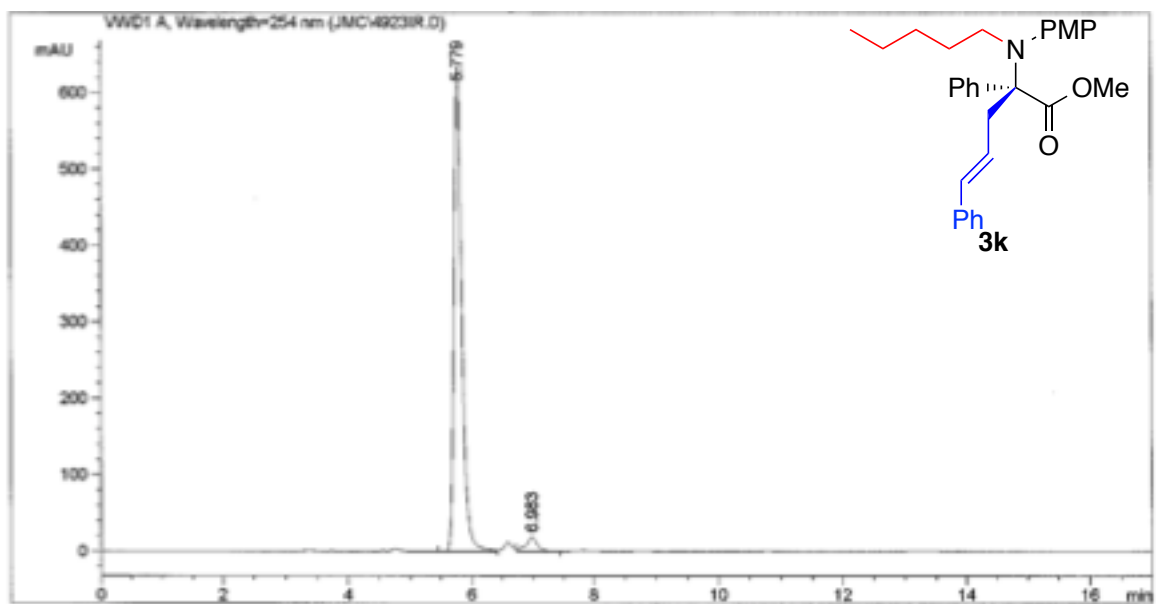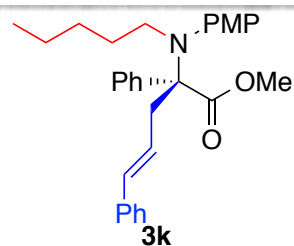

| Peak # | RetTime [min] | Type | Width [min] | Area mAU   | Area %  | Height [mAU] |
|--------|---------------|------|-------------|------------|---------|--------------|
| 1      | 5.779         | VV   | 0.1335      | 5534.55566 | 95.7266 | 636.15051    |
| 2      | 6.983         | VV   | 0.1803      | 247.06935  | 4.2734  | 18.79782     |

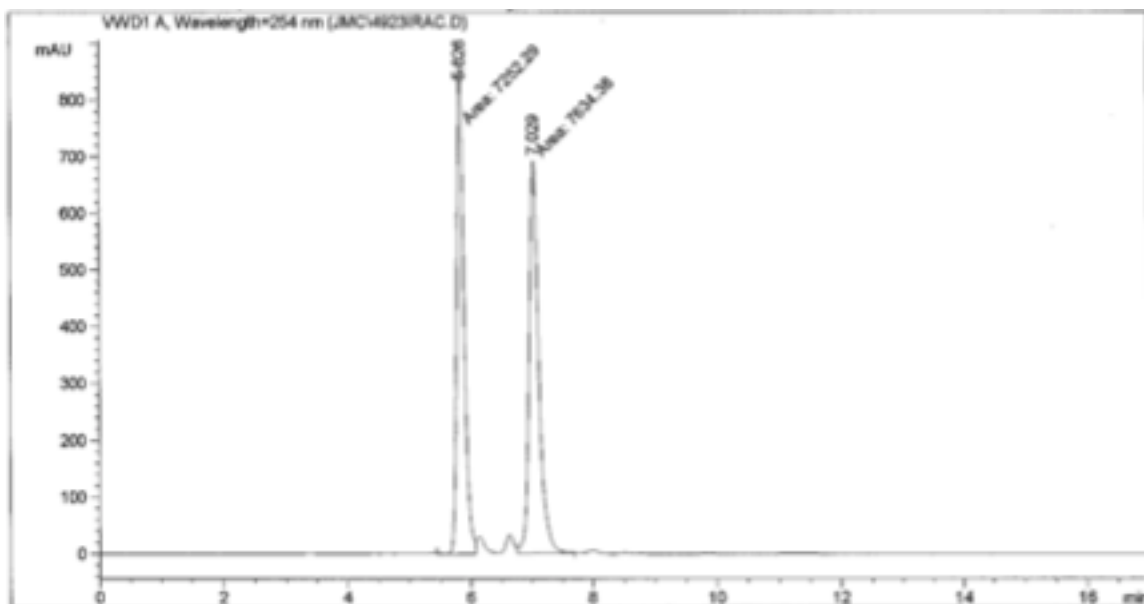

| Peak # | RetTime [min] | Type | Width [min] | Area mAU   | Area %  | Height [mAU] |
|--------|---------------|------|-------------|------------|---------|--------------|
| 1      | 5.826         | MF   | 0.1396      | 7252.29297 | 48.7168 | 865.64648    |
| 2      | 7.029         | FM   | 0.1837      | 7634.35547 | 51.2832 | 692.02214    |

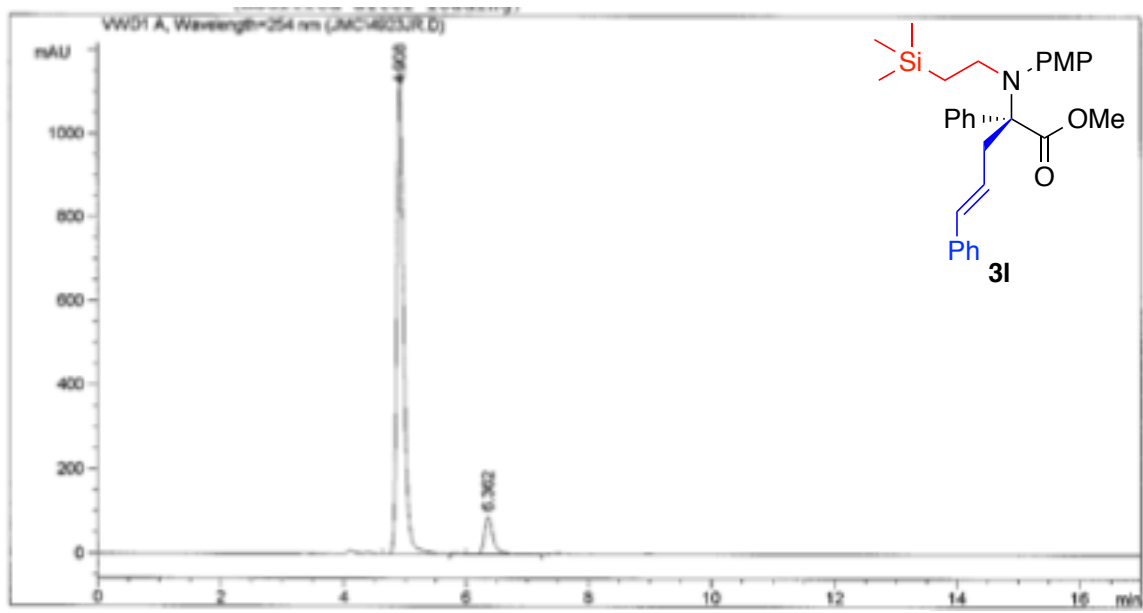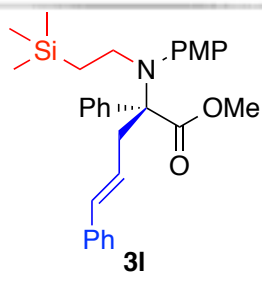

| Peak # | RetTime [min] | Type | Width [min] | Area mAU   | Height [mAU] | Area %  |
|--------|---------------|------|-------------|------------|--------------|---------|
| 1      | 4.908         | VV   | 0.1162      | 8926.06543 | 1157.04175   | 90.7419 |
| 2      | 6.362         | VV   | 0.1503      | 910.69373  | 89.83418     | 9.2581  |

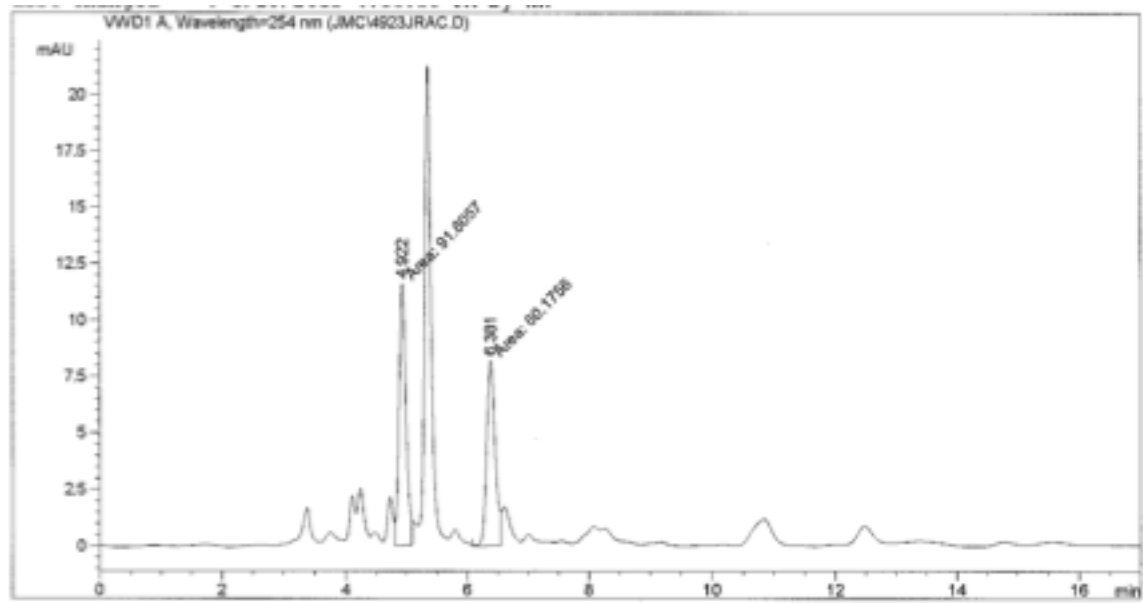

| Peak # | RetTime [min] | Type | Width [min] | Area mAU | Height [mAU] | Area %  |
|--------|---------------|------|-------------|----------|--------------|---------|
| 1      | 4.922         | MF   | 0.1317      | 91.80573 | 11.61616     | 53.3812 |
| 2      | 6.381         | MF   | 0.1626      | 80.17558 | 8.21881      | 46.6188 |

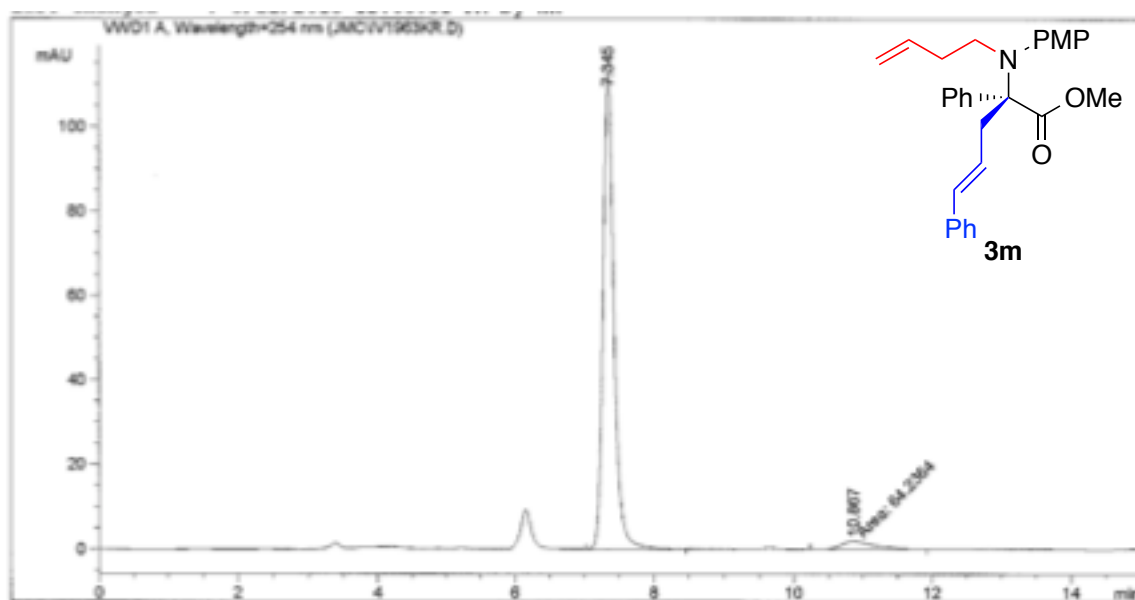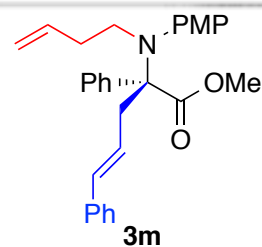

| Peak # | RetTime [min] | Type | Width [min] | Area mAU *s | Height [mAU] | Area %  |
|--------|---------------|------|-------------|-------------|--------------|---------|
| 1      | 7.345         | BB   | 0.1665      | 1250.30359  | 113.41366    | 95.1134 |
| 2      | 10.867        | MM   | 0.5677      | 64.23636    | 1.88575      | 4.8866  |

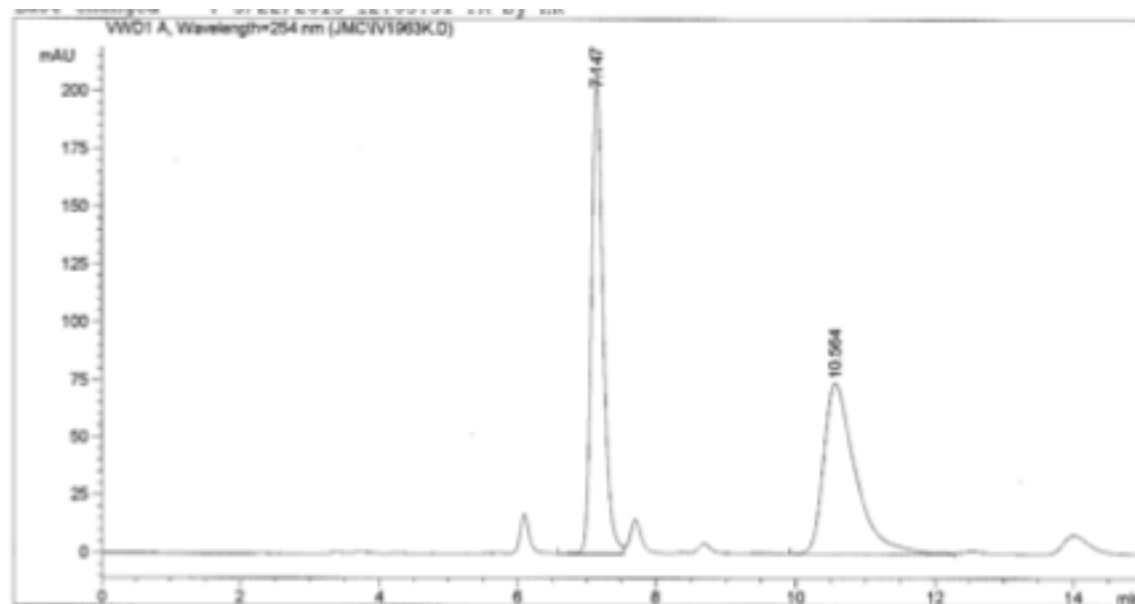

| Peak # | RetTime [min] | Type | Width [min] | Area mAU *s | Height [mAU] | Area %  |
|--------|---------------|------|-------------|-------------|--------------|---------|
| 1      | 7.147         | VV   | 0.1736      | 2405.96509  | 208.96895    | 50.1774 |
| 2      | 10.564        | VV   | 0.4710      | 2388.95190  | 74.33871     | 49.8226 |

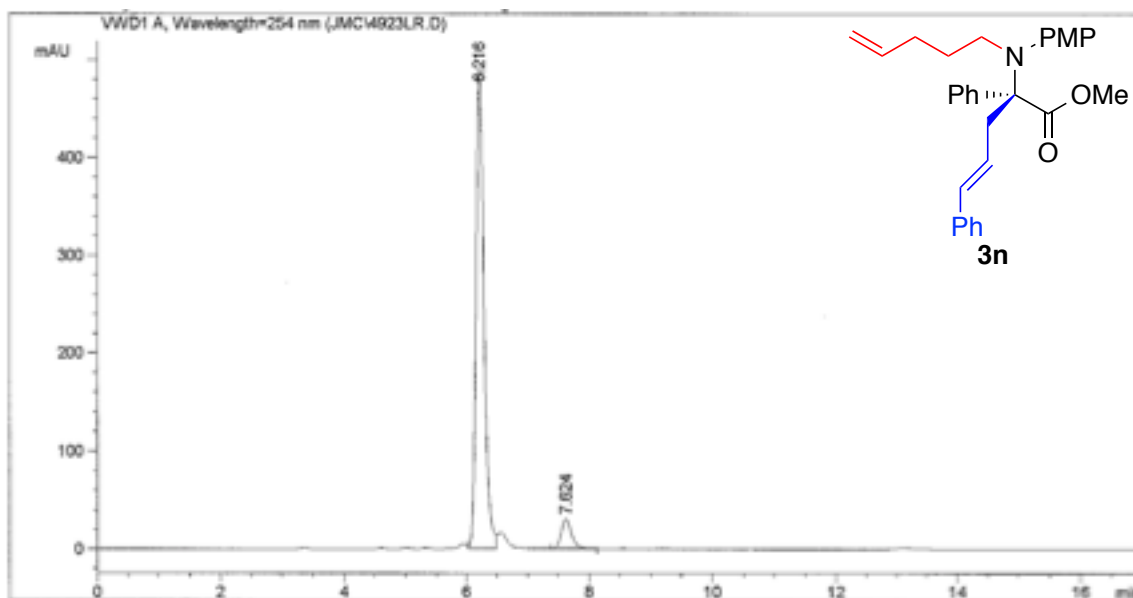

| Peak # | RetTime [min] | Type | Width [min] | Area mAU   | Area %  | Height [mAU] |
|--------|---------------|------|-------------|------------|---------|--------------|
| 1      | 6.216         | VV   | 0.1374      | 4459.02783 | 92.6531 | 493.72812    |
| 2      | 7.624         | BB   | 0.1758      | 353.57953  | 7.3469  | 30.54416     |

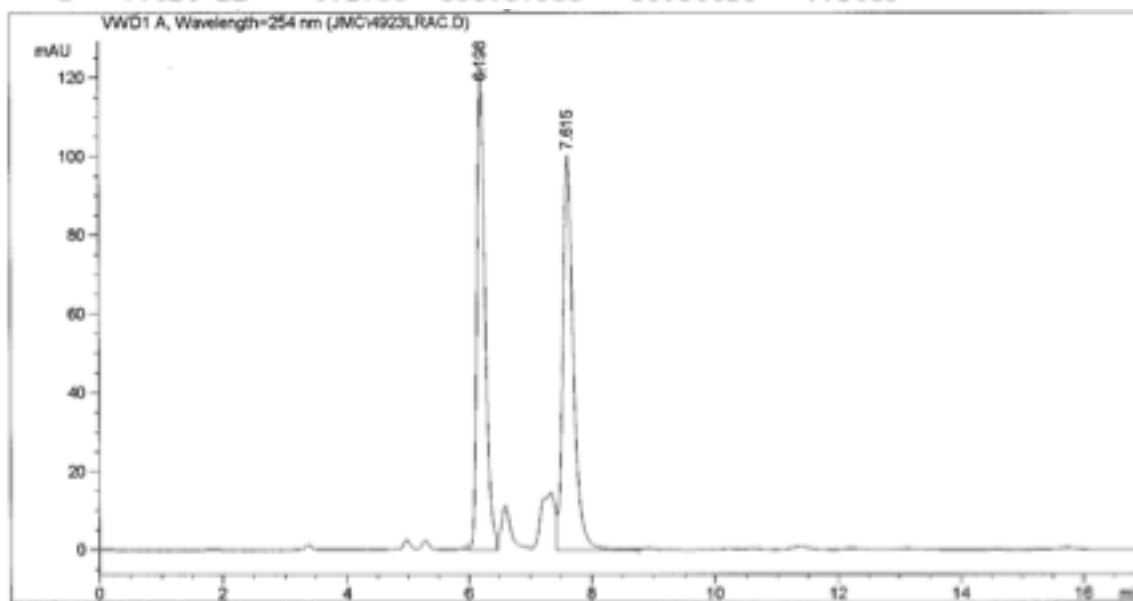

| Peak # | RetTime [min] | Type | Width [min] | Area mAU   | Area %  | Height [mAU] |
|--------|---------------|------|-------------|------------|---------|--------------|
| 1      | 6.198         | VV   | 0.1391      | 1129.90991 | 48.3108 | 123.10315    |
| 2      | 7.615         | VV   | 0.1813      | 1208.92627 | 51.6892 | 100.34201    |

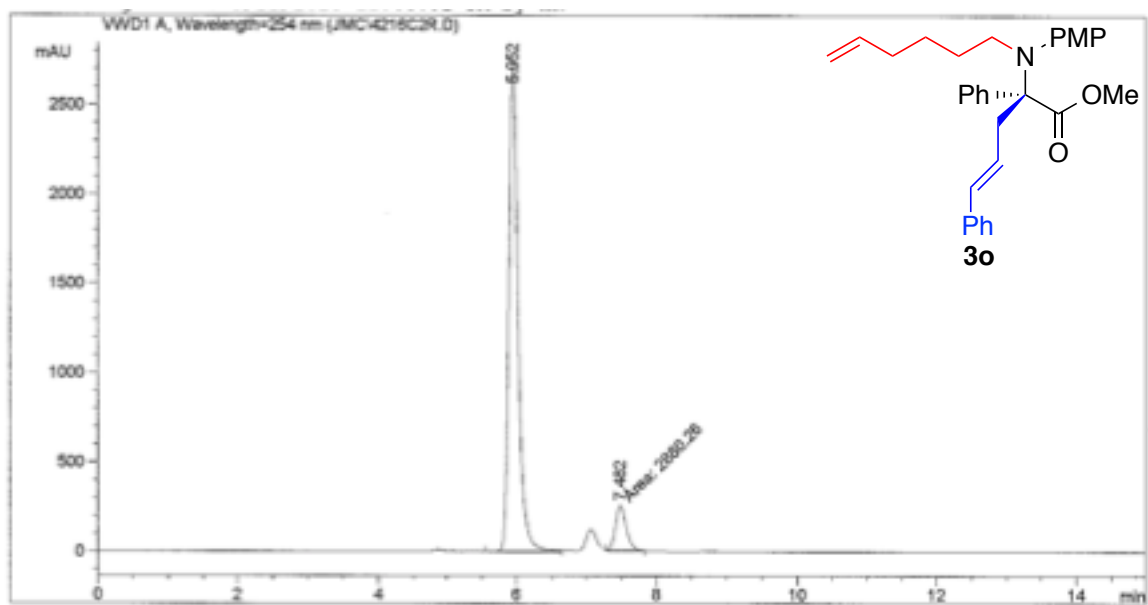

| Peak # | RetTime [min] | Type | Width [min] | Area mAU   | *s | Height [mAU] | Area %  |
|--------|---------------|------|-------------|------------|----|--------------|---------|
| 1      | 5.952         | VV   | 0.1444      | 2.54457e4  |    | 2711.85498   | 89.8317 |
| 2      | 7.482         | FM   | 0.1881      | 2880.25732 |    | 255.14885    | 10.1683 |

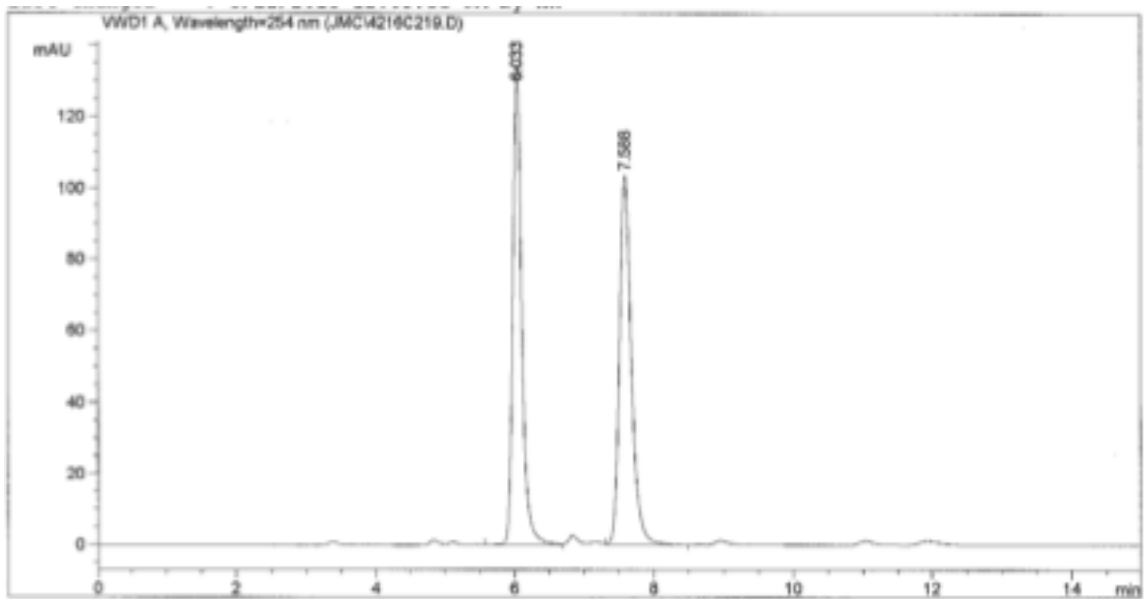

| Peak # | RetTime [min] | Type | Width [min] | Area mAU   | *s | Height [mAU] | Area %  |
|--------|---------------|------|-------------|------------|----|--------------|---------|
| 1      | 6.033         | VV   | 0.1360      | 1214.39587 |    | 134.45268    | 50.1560 |
| 2      | 7.588         | VV   | 0.1766      | 1206.84045 |    | 103.69136    | 49.8440 |

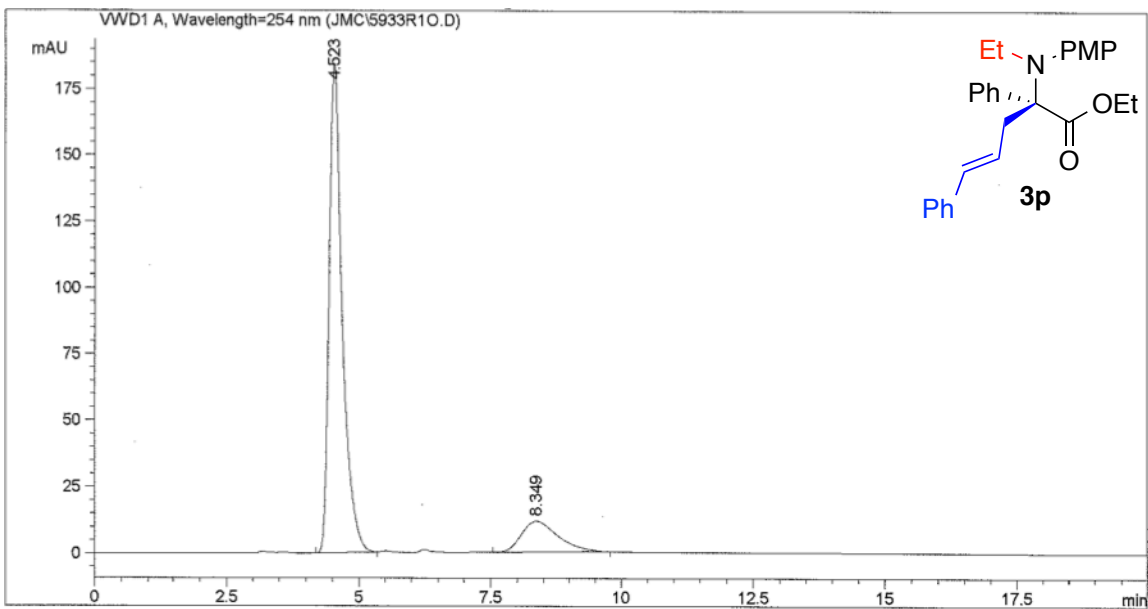

| Peak # | RetTime [min] | Type | Width [min] | Area mAU   | Height [mAU] | Area %  |
|--------|---------------|------|-------------|------------|--------------|---------|
| 1      | 4.523         | BB   | 0.2535      | 3156.64819 | 184.45398    | 84.4770 |
| 2      | 8.349         | PB   | 0.7349      | 580.04828  | 11.71511     | 15.5230 |

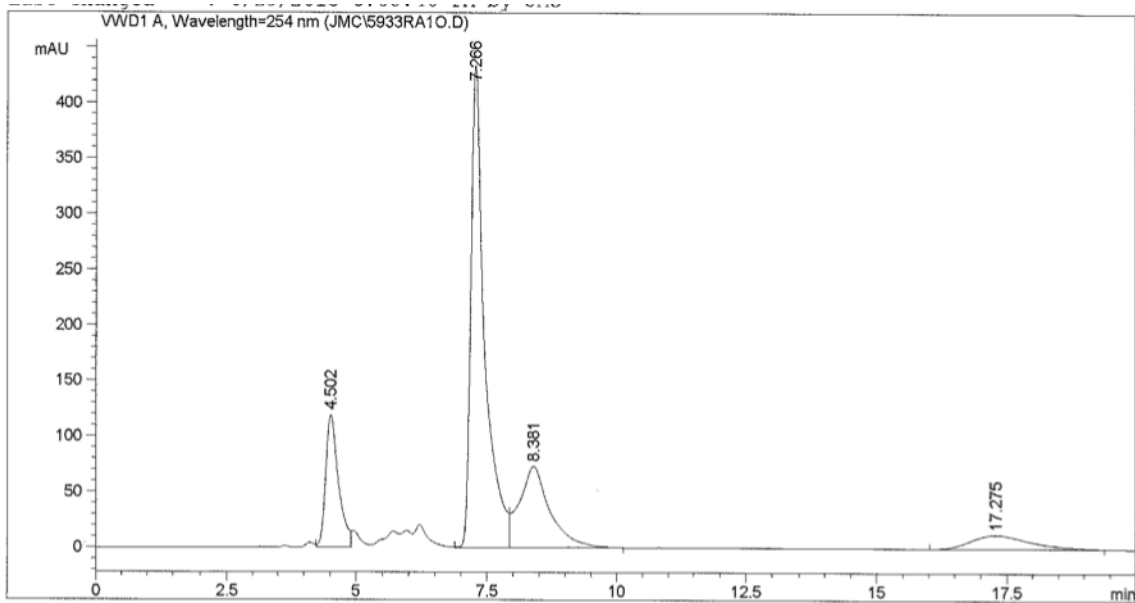

| Peak # | RetTime [min] | Type | Width [min] | Area mAU   | Height [mAU] | Area %  |
|--------|---------------|------|-------------|------------|--------------|---------|
| 1      | 4.502         | VV   | 0.2570      | 2056.02686 | 118.94724    | 14.6184 |
| 2      | 7.266         | BV   | 0.2642      | 8045.12988 | 434.20255    | 57.2012 |
| 3      | 8.381         | VB   | 0.5615      | 2964.00098 | 72.93364     | 21.0742 |
| 4      | 17.275        | BB   | 1.1464      | 999.46112  | 12.56507     | 7.1062  |



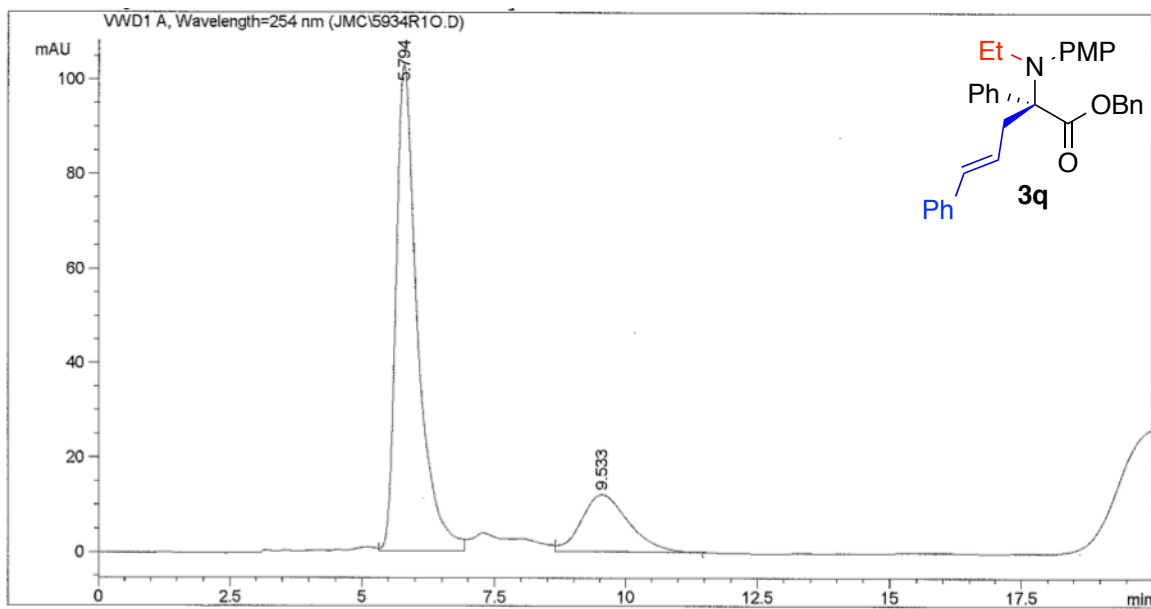

| Peak # | RetTime [min] | Type | Width [min] | Area mAU   | Area *s | Height [mAU] | Area %  |
|--------|---------------|------|-------------|------------|---------|--------------|---------|
| 1      | 5.794         | VB   | 0.4146      | 2884.59131 |         | 102.82536    | 78.8775 |
| 2      | 9.533         | VB   | 0.9499      | 772.46008  |         | 12.12699     | 21.1225 |

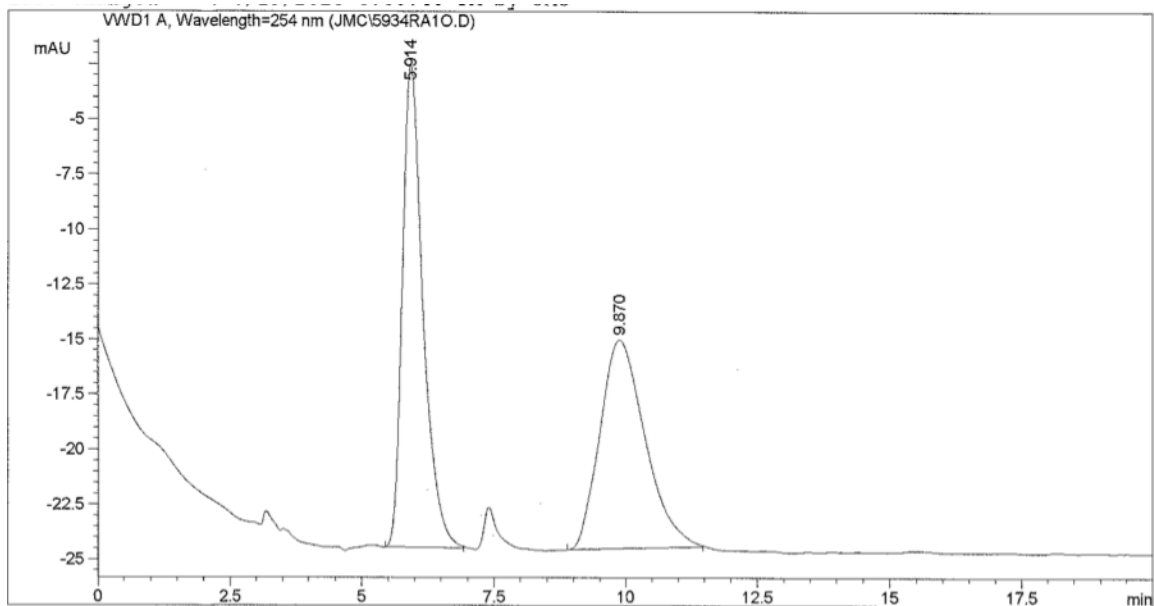

| Peak # | RetTime [min] | Type | Width [min] | Area mAU  | Area *s | Height [mAU] | Area %  |
|--------|---------------|------|-------------|-----------|---------|--------------|---------|
| 1      | 5.914         | PB   | 0.4099      | 596.24884 |         | 21.96358     | 50.8509 |
| 2      | 9.870         | BB   | 0.8968      | 576.29413 |         | 9.50249      | 49.1491 |

Enhancement of enantioenrichment of **3f**.

Pre-recrystallization:

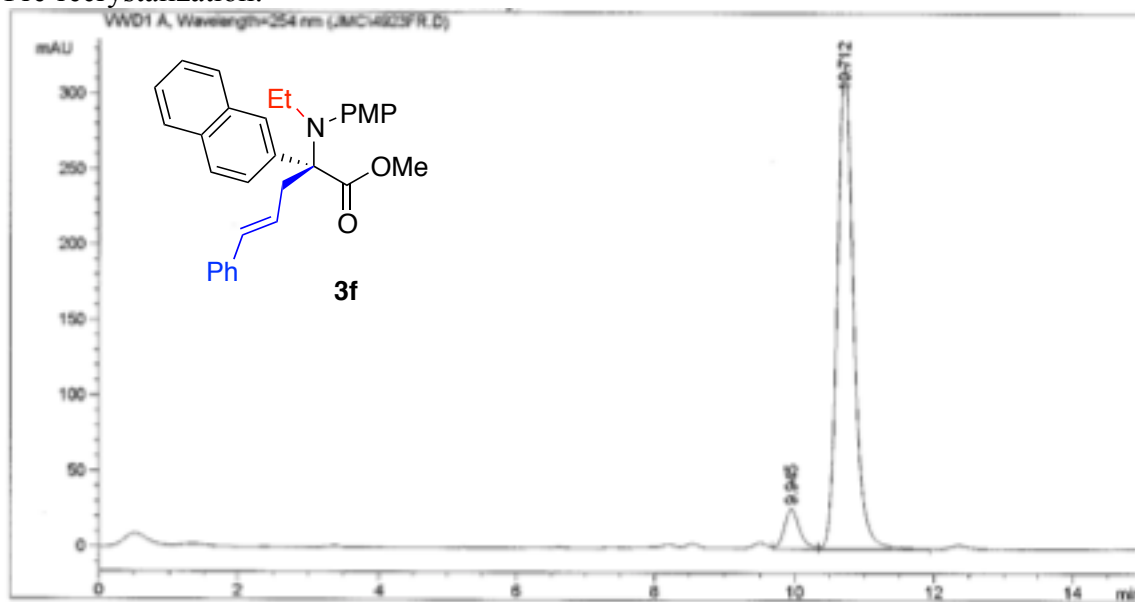

| Peak # | RetTime [min] | Type | Width [min] | Area mAU*s | Height [mAU] | Area %  |
|--------|---------------|------|-------------|------------|--------------|---------|
| 1      | 9.945         | VV   | 0.2324      | 397.46729  | 26.18261     | 7.1382  |
| 2      | 10.712        | VV   | 0.2468      | 5170.67871 | 319.90131    | 92.8618 |

Crystals after Trituration:

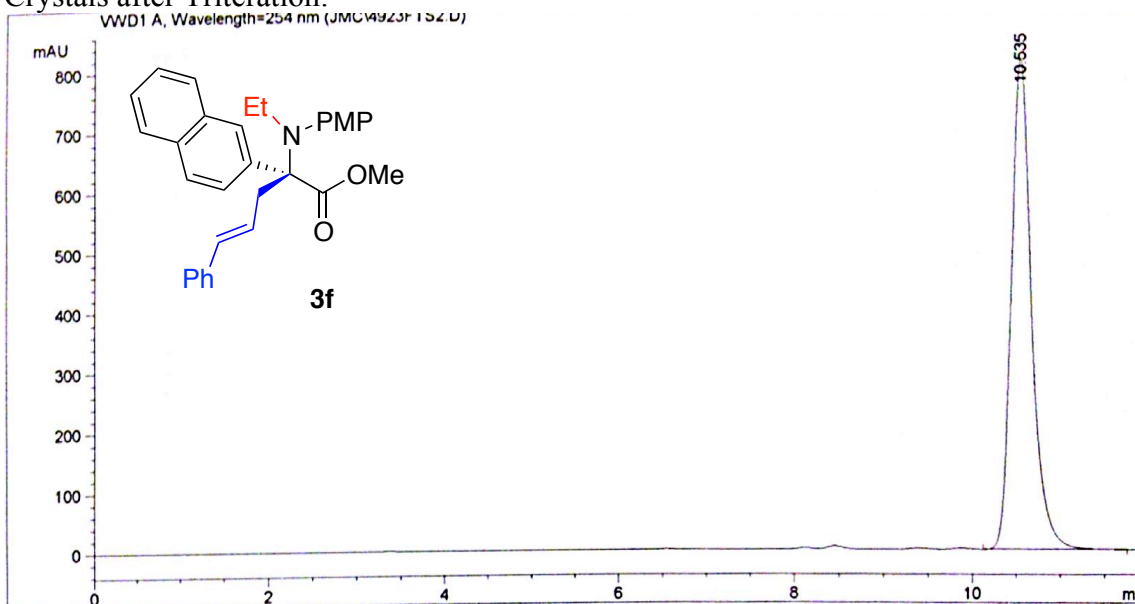

| Peak # | RetTime [min] | Type | Width [min] | Area mAU*s | Height [mAU] | Area %   |
|--------|---------------|------|-------------|------------|--------------|----------|
| 1      | 10.535        | VB   | 0.2425      | 1.31538e4  | 819.94324    | 100.0000 |
